1 The rice G protein  $\gamma$  subunit *qPE9-1* positively regulates grain-filling  
2 process by interacting with abscisic acid and auxin

3 Dongping Zhang<sup>1,2,#</sup>, Minyan Zhang<sup>1,#</sup>, Yong Zhou<sup>1,#</sup>, Yuzhu Wang<sup>1</sup>, Hongyingxue Chen<sup>1</sup>,  
4 Weifeng Xu<sup>3,\*</sup>, Lin Zhang<sup>1</sup>, Ting Pan<sup>1</sup>, Bing Lv<sup>1</sup>, Guohua Liang<sup>1,\*</sup>, Jiansheng Liang<sup>1,2,\*</sup>

5

6 <sup>1</sup>Jiangsu Key Laboratory of Crop Genetics and Physiology/Co-Innovation Center for Modern  
7 Production Technology of Grain Crops, Key Laboratory of Plant Functional Genomics of the  
8 Ministry of Education, Yangzhou University, Yangzhou, China, 225009

9 <sup>2</sup>Department of Biology, Southern University of Science and Technology, Shenzhen, China  
10 518055

11 <sup>3</sup>College of Life Sciences and Key Laboratory of Ministry of Education for Genetic Breeding  
12 and Multiple Utilization of Crops, Fujian Agriculture and Forestry University, Fuzhou,  
13 Fujian, China 350002

14

15

16

17 <sup>#</sup>These authors contributed equally to this work.

18 <sup>\*</sup>Corresponding author: Jiansheng Liang, Tel: +86 755 8801 0303, Fax: +86 755 8801 0304,

19 Email: liangjs@sustc.edu.cn; Weifeng Xu, Tel: +86 591 83737535, Fax: +86 591 83719866,

20 Email: wfxu@fafu.edu.cn; Guohua Liang, Tel: +86 13235277176, Fax: +514 87972138,

21 Email: ricegb@yzu.edu.cn

22

23

24 **Abstract**

25 The rice genome contains a single  $G_\alpha$  (*RGAI*) and  $G_\beta$  (*RGBI*) and five  $G_\gamma$  subunits. Recent  
26 genetic studies have shown that *DEP1/qPE9-1*, an atypical putative  $G_\gamma$  protein, is responsible  
27 for dense and erect panicles, but the biochemical and molecular mechanisms underlying  
28 control of grain size are not well understood. Here, we report that plants carrying *qPE9-1*  
29 have more endosperm cells per grain than plants contain the *qpe9-1* allele. The *qPE9-1* line  
30 has a higher rate and longer period of starch accumulation than the *qpe9-1* line. Additionally,  
31 the expression of several key genes encoding enzymes catalyzing sucrose metabolism and  
32 starch biosynthesis is higher in the *qPE9-1* line than in the *qpe9-1* line, especially from the  
33 mid to late grain-filling stage. Grains of the *qPE9-1* line also have higher contents of two  
34 phytohormones, ABA and IAA. Exogenous application of ABA or IAA enhanced starch  
35 accumulation and the expression of genes encoding grain-filling-related enzymes in the  
36 grains of *qPE9-1*, whereas only IAA produced these effects in *qpe9-1*. Based on these results,  
37 we conclude that *qPE9-1* promotes endosperm cell proliferation and positively regulates  
38 starch accumulation largely through ABA and IAA, which enhance the expression of genes  
39 encoding starch biosynthesis during the late grain-filling stage.

40

41 **Keywords:** G-protein, *qPE9-1*, starch biosynthesis, grain filling, hormones, *Oryza sativa*

42

43

44

45

46

## 47 **Introduction**

48 Rice is the major staple food for more than half of the global population. This crop provides  
49 approximately 20% of the global dietary energy supply and plays vital roles in sustaining  
50 global food security. Understandably, improving rice productivity is the predominant target  
51 in rice breeding because of the continuing increase in the global population. Rice yield is a  
52 complex trait that is influenced by numerous components, including the number of panicles  
53 per plant, the number of grains per panicle and the grain size (i.e., 1000-grain weight).  
54 Furthermore, these components interact with each other in most cases. Typically, the rice  
55 grain yield is determined by both the grain capacity (i.e., the grain number and size) and the  
56 grain-filling efficiency; the former is controlled by the numbers of spikelets per panicle and  
57 the numbers and sizes of endosperm cells per spikelet/grain, both of which determine the  
58 final grain number per panicle and the grain size. The grain-filling efficiency is closely  
59 related to the grain-filling rate and duration.

60 The heterotrimeric G protein (hereafter G protein)-mediated signal transduction pathway is  
61 considered one of the most important signaling mechanisms and regulates various important  
62 physiological and molecular processes in both mammals and higher plants (Urano *et al.*,  
63 2014). In this signaling pathway, the G protein, which is well-known to consist of three  
64 different subunits ( $\alpha$ ,  $\beta$  and  $\gamma$ ) acts as a signal intermediary in the transduction of numerous  
65 external signals (Milligan & Kostenis, 2006). Arabidopsis G-protein Gamma subunit 3  
66 (*AGG3*), which represents a novel class of canonical  $\gamma$  subunits in Arabidopsis, is widely  
67 spread throughout the plant kingdom but is not present in animals (Urano *et al.*, 2013).  
68 Recently, *AGG3* has been proposed to be an important regulator of organ size and a mediator  
69 of stress responses in *Arabidopsis*. Roy Choudhury *et al.* (2013) overexpressed *AGG3* in  
70 *Camelina* and found that it increased the seed size, seed mass and seed number per plant by  
71 15%-40%, effectively resulting in a significantly higher oil yield per plant. In addition,

72 recently *AGG3* has been shown to affect the guard cell K<sup>+</sup> channel, morphological  
73 development, ABA responses and cell proliferation (Chakravorty *et al.*, 2011; Li *et al.*, 2012;  
74 Roy Choudhury *et al.*, 2013). These observations draw a strong link between the roles of  
75 *AGG3* in regulating two critical yield parameters (seed traits and plant stress responses) and  
76 reveal an effective biotechnological tool to dramatically increase agricultural crop yield.

77 Homologs of *AGG3* in rice have been identified as important quantitative trait loci (QTL)  
78 for grain size and yield. The major rice QTL [i.e., *GRAIN SIZE 3 (GS3)* and *DENSE AND*  
79 *ERECT PANICLE1 (DEP1)/PANICLE ERECTNESS (qPE9-1)*] have 29.4% and 22.5%  
80 amino acid sequence identities, respectively, with *AGG3* (Li *et al.*, 2012). As an atypical G<sub>γ</sub>  
81 protein, rice *GS3* has been proposed to negatively affect cell proliferation, whereas  
82 *DEP1/qPE9-1* plays a positive role (Fan *et al.*, 2006; Huang *et al.*, 2009). These findings  
83 suggest that *AGG3* and its homologs in rice may have divergent functions.

84 In the present study, we show that *qPE9-1* stimulates endosperm cell proliferation, grain  
85 filling and consequently the final grain weight. The results also indicate that *qPE9-1* exerts its  
86 effects at least in part by controlling abscisic acid (ABA) and indole-3-acetic acid (IAA)  
87 biosynthesis.

88

## 89 **Materials and Methods**

### 90 **Plant material and treatments**

91 The experiment was carried out at the farm of Yangzhou University (32°30'N, 119°25'E)  
92 during the rice (*Oryza sativa*) growing season (from early May to early September).

93 Transgenic rice *qPE9-1* and the donor Wuyunjing 8 (*qpe9-1*) were grown in the field (see  
94 Zhou *et al.*, 2009). At the heading stage, 500 uniformly growing and headed panicles (1-2  
95 panicles per plant) were chosen, and spikelets on the selected panicles with the same

96 flowering date were labeled for each cultivar/line. The flowering date and position of each  
97 spikelet on the labeled panicles were recorded. Approximately 45 labeled panicles were  
98 sampled at each time point from flowering to maturity. Half of the sampled grains were  
99 frozen in liquid nitrogen for at least 2 min and then stored at  $-80^{\circ}\text{C}$  for subsequent analyses.  
100 The other half of the grains were dried at  $80^{\circ}\text{C}$  for approximately 72 h to a constant weight  
101 and used for the starch analyses.

102 The hormone treatment consisted of 80 plastic pots with planted rice (three hills per pot)  
103 maintained under open field conditions. Each pot (0.6 m in height with 0.5 m and 0.3 m top  
104 and bottom diameters, respectively) was filled with sandy loam soil that contained the same  
105 nutrient contents as the field soil. The sowing date and cultivation were the same as those for  
106 the field experiment. After flowering, either  $50\ \mu\text{M}$  ABA or  $110\ \mu\text{M}$  IAA was sprayed at a  
107 rate of 10 ml per pot on the top of the plants (spikes) every 3 days. Both ABA and IAA were  
108 applied between 16:00 h and 18:00 h. All of the solutions contained ethanol and Tween 20 at  
109 final concentrations of 0.1% (v/v) and 0.01% (v/v), respectively. The control plants were  
110 sprayed with the same volume of deionized water containing the same ethanol and Tween 20  
111 concentrations. Each treatment consisted of 13 pots, and the labeled spikelets were sampled.  
112

### 113 **Isolation and counting of endosperm cells**

114 The endosperm cells of the grains were isolated and counted according to the procedures  
115 described by Singh & Jenner (1982). Briefly, fixed grains (10 grains from five labeled  
116 panicles) were transferred to 0.7:1 (v:v) ethanol:water and dehulled. The dehulled grains  
117 were transferred to 0.5:1 (v:v) ethanol, 0.25:1 (v:v) ethanol and finally to distilled water for  
118 5~7 h prior to dissection of the endosperms. The endosperms were isolated under a dissecting  
119 microscope and dyed using Delafield's hematoxylin solution for 24~30 h, washed several

120 times with distilled water and then hydrolyzed in a 0.1% cellulase solution at 40°C. The  
121 degree of recovery of the cells after digestion was 80~95%. The isolated endosperm cells  
122 were diluted to 2~10 ml according to the developmental stage of the endosperm, from which  
123 5 subsamples (20 ml per subsample) were transferred to a counting chamber (1-cm<sup>2</sup> area).  
124 The endosperm cell number in 10 grids per counting chamber was counted using a light  
125 microscope. The number of nuclei was counted as the number of endosperm cells. The total  
126 endosperm cell numbers were calculated using the following equation (Liang *et al.*, 2001):

$$\text{Endosperm cell number} = \frac{\frac{\text{cell number}}{\text{grid}} \times \text{counting chamber area}}{\frac{\text{area of each grid}}{\text{volume of each subsample}}} \times \text{total volume of sample}$$

127

### 128 **Gene expression analysis**

129 Total RNA was extracted from the grains (10~20 grains from five labeled panicles) using the  
130 RNAPrep Pure Plant Kit (cat. no. DP441; Tiangen, Beijing, China). The HiScript II Q Select  
131 RT SuperMix (Vazyme, Nanjing, China) was used for cDNA synthesis. The transcript level  
132 of each gene was measured by qRT-PCR using the 7500 Real-Time PCR System (ABI) with  
133 the PowerUp™ SYBR® Green Master Mix (Thermo Fisher Scientific, San Jose, USA). Gene  
134 expression was quantified during the logarithmic phase using expression of the housekeeping  
135 gene *Ubq* (LOC\_Os03g13170) as an internal control. Three biological replicates were  
136 performed for each experiment. The primer sequences used for qRT-PCR are described by  
137 Wang *et al.* (2013).

138

### 139 **Hormone quantification**

140 The IAA and ABA levels were determined by Zoonbio Biotechnology Co., Ltd (Nanjing,  
141 China). Approximately 0.5 g of the samples were ground in a precooled mortar that contained

142 5 ml of extraction buffer composed of isopropanol/hydrochloric acid. The extract was shaken  
143 at 4°C for 30 min. Then, 10 ml of dichloromethane was added, and the sample was shaken at  
144 4°C for 30 min and centrifuged at 13,000 rpm for 5 min at the same temperature. We  
145 extracted the lower organic phase. The organic phase was dried under N<sub>2</sub>, dissolved in 150 µl  
146 of methanol (0.1% methane acid) and filtered with a 0.22-µm filter membrane. The purified  
147 product was subjected to high-performance liquid chromatography-tandem mass  
148 spectrometry (HPLC-MS/MS) analysis. The HPLC analysis was performed using a  
149 ZORBAX SB-C18 (Agilent Technologies) column (2.1 mm × 150 mm; 3.5 mm). The mobile  
150 phase A solvent consisted of methanol/0.1% methanoic acid, and the mobile phase B solvent  
151 consisted of ultrapure water/0.1% methanoic acid. The injection volume was 2 µl. The MS  
152 conditions were as follows: the spray voltage was 4500 V; the pressure of the air curtain,  
153 nebulizer and aux gas were 15, 65 and 70 psi, respectively; and the atomizing temperature  
154 was 400°C.

155

### 156 **Enzyme activity assays**

157 The dehulled grains (10 grains from five labeled panicles) were homogenized with a  
158 prechilled mortar and pestle in 100 mM HEPES buffer (pH 7.5) containing 8 mM MgCl<sub>2</sub>, 2  
159 mM EDTA, 50 mM 2-mercaptoethanol, 12% (v/v) glycerol and 1% (w/v)  
160 polyvinylpyrrolidone (PVP). After centrifugation at 30,000 x g for 10 min at 4°C, the  
161 supernatant was desalted through a dialytic membrane. The dialysis buffer contained 5 mM  
162 HEPES-NaOH, pH 7.4, 5 mM MgCl<sub>2</sub>, 1 mM EDTA and 0.5 mM DTT. The enzyme activity  
163 of SUS (in the cleavage direction), SS and BE was determined as described by Nakamura *et*  
164 *al.* (1989), Jiang *et al.* (2003) and Tang *et al.* (2009). The grain starch contents were  
165 determined according to Lü *et al.* (2008).

166

## 167 **Protein blotting analysis**

168 Rice grains (~10 grains from five labeled panicles of different plants) were homogenized in  
169 TEDM buffer (20 mM Tris/HCl, pH 7.5, 1 mM DTT, 5 mM EDTA and 10 mM MgCl<sub>2</sub>)  
170 containing a complete protease inhibitor cocktail (Roche). The homogenate was centrifuged  
171 at 6,000 x g for 30 min at 4°C to remove cellular debris, and the supernatant was clarified by  
172 centrifugation at 5,000 x g for 90 min at 4°C. The soluble proteins were separated by SDS-  
173 PAGE on a 10% gel and blotted onto a Polyvinylidene difluoride (PVDF) membrane  
174 (Millipore, Bedford, MA, USA). The DEP1/qPE9-1 (LOC\_Os09g26999) and RGB1  
175 (LOC\_Os03g46650) antibodies were prepared by ABclonal (Wuhan, China). Serum was  
176 collected from a rabbit after multiple injections of the RGB1 (full-length) protein and a  
177 polypeptide (MEAPRPKSPPRYPDLC) of qPE9-1 as the antigen. The evaluation of antibody  
178 valence is shown in Figure S1.

179

## 180 **Statistical analysis**

181 The data are presented as the mean ± SD. The SPSS 16.0 software was used for all statistical  
182 analyses. Statistical significance was determined for independent biological samples using  
183 Student's t-test for comparison of two groups and one-way ANOVA for comparison of three  
184 or more groups. Differences were considered statistically significant when  $P < 0.05$ . An  
185 asterisk (\*) is presented when  $P \leq 0.05$ .

186

## 187 **Results**

188 ***qPE9-1* positively controls grain size**



189 Using QTL analysis, two independent research groups originally identified rice *qPE9-1* as  
190 controlling the panicle morphology and grain number per panicle (Huang *et al.*, 2009; Zhou  
191 *et al.*, 2009). However, the biochemical and molecular mechanisms underlying control of the  
192 rice grain size and weight are largely unknown. In the present study, we compared the  
193 differences in grain size of Wuyunjing 8, which contains the *qpe9-1* allele (hereafter *qpe9-1*),  
194 and the *qPE9-1* transgenic line (hereafter *qPE9-1*). The results showed that the *qpe9-1* grain  
195 was approximately 12% shorter than that of *qPE9-1* (Fig. 1a and f) and that *qPE9-1* had a  
196 larger grain size during the grain-filling stage than *qpe9-1* (Fig. 1c). However, the width and  
197 thickness of the *qpe9-1* and *qPE9-1* grains did not differ significantly (Fig. 1b and f). The  
198 1000-grain weight of *qPE9-1* was remarkable higher than that of *qpe9-1* (Fig. 1g). The  
199 mRNAs of *qPE9-1* are still present in *qpe9-1*, although neither the full-length protein (qPE9-  
200 1, predicted molecular weight 45.2 kDa) nor a truncated protein (qpe9-1, predicted molecular  
201 weight 21.5 kDa) was detected by immunoblotting with the anti-qPE9-1 antibody (Figs. 1d  
202 and e). These results indicate that the full-length qPE9-1 protein promotes the grain length in  
203 rice.

204

### 205 ***qPE9-1* endosperm cell proliferation**

206 Organ size and shape are determined by cell proliferation and expansion (Orozco-Arroyo *et*  
207 *al.*, 2015). We compared the numbers of endosperm cells in cross-sections of mature grains  
208 from *qpe9-1* and *qPE9-1* (Fig. 2a). No significant difference in the endosperm cell area was  
209 observed between the *qpe9-1* and *qPE9-1* lines (Fig. 2b). We also found that the number of  
210 endosperm cells per grain increased rapidly during early grain filling and that the peak values  
211 were reached nine days after flowering (9 DAF). The number of endosperm cells per grain of  
212 *qPE9-1* was significantly higher than that of *qpe9-1* (Fig. 2c). The long and short axes of the  
213 *qpe9-1* endosperm cells were slightly shorter than those of *qPE9-1*, but the differences were

214 not significant (Fig. 2d). These findings suggest that *qPE9-1* has no obvious effect on cell  
215 proliferation during grain growth and development and that the increase in endosperm (grain)  
216 size in *qPE9-1* results mainly from an increase in cell numbers during the early stage of grain  
217 development.

### 218 ***qPE9-1* enhances starch biosynthesis in rice grains**

219 The starch content of the grains increased rapidly after flowering in both genotypes. However,  
220 the grain of the *qPE9-1* line contained a much higher starch content than that of the *qpe9-1*  
221 line, and the final starch content measured in the *qPE9-1* grain was approximately 25%  
222 higher than that in *qpe9-1* (Fig. 3a). Interestingly, the maximum starch content was measured  
223 at 27 DAF in *qpe9-1* and remained relatively stable until the end of grain filling, whereas the  
224 starch content in *qPE9-1* increased continuously until 33 DAF (Fig. 3a). The rate of starch  
225 accumulation increased rapidly after flowering, reached its maximal level at 15 DAF and  
226 then decreased as the grain-filling process continued. Again, the rate of starch accumulation  
227 during grain filling was almost always higher in *qPE9-1* than in *qpe9-1*, especially from the  
228 mid to late grain-filling stage (from 18 to 33 DAF, Fig. 3b). These results clearly indicate that  
229 *qPE9-1* positively controls the starch accumulation process during grain filling and prolongs  
230 the duration of the grain-filling process. Furthermore, the total starch content in *qPE9-1* flour  
231 was significantly higher than that of *qpe9-1*, suggesting that *qPE9-1* increased conversion of  
232 sucrose to starch.

233

### 234 ***qPE9-1* stimulates the expression of genes encoding grain-filling-related enzymes**

235 Sucrose synthase (SUS), invertase (INV), ADP-glucose pyrophosphorylase (AGP), starch  
236 synthases (SS and GBSS), branching enzyme (BE) and debranching enzyme (DBE) are well-  
237 known to play key roles in the regulation of sucrose degradation, ADP-glucose and starch

238 biosynthesis (Liang *et al.*, 2001; Lü *et al.*, 2008; Tang *et al.*, 2009; also see reviews by  
239 Tetlow *et al.*, 2004; Keeling & Myers, 2010; Zeeman *et al.*, 2010). In this study, we found  
240 that the *OsSUS3*, *OsSSIIa* and *OsBEIIb* transcript levels were significantly higher in the  
241 *qPE9-1* grains than in the *qpe9-1* grains. Then, we examined the expression of these genes  
242 during the entire grain-filling stage. The results showed that the transcript levels of these  
243 genes were significantly higher in the *qPE9-1* grains than in the *qpe9-1* grains, especially at  
244 the later grain-filling stage (Fig. 4a). These results suggest that the molecular mechanisms  
245 that regulate sucrose degradation and starch biosynthesis may differ between *qpe9-1* and  
246 *qPE9-1*, which may explain the differences in the final grain weight between the two  
247 genotypes.

248 To elucidate the roles of these genes at the biochemical level, the activities of several  
249 enzymes encoded by these genes were measured in the grains of the two genotypes during  
250 grain filling. As shown in Fig. 4b, significant differences in SUS, SS, GBSS and BE activity  
251 were observed between *qpe9-1* and *qPE9-1*; the dynamic changes in the activities of these  
252 enzymes during grain filling were very similar to the expression patterns of the encoded  
253 genes. Taken together, our results suggest that *qPE9-1* plays key roles in controlling grain  
254 filling through its effects on gene expression and the activities of the encoded enzymes  
255 related to sucrose metabolism and starch biosynthesis during grain filling.

256

### 257 ***qPE9-1* enhances the accumulation of ABA and IAA in the endosperm during grain** 258 **filling**

259 Rice grain filling is a complicated process that involves the interconversion of many  
260 metabolites and the metabolism of bioactive compounds, including plant hormones. The rice  
261 grain-filling process is highly regulated by plant hormones (Tang *et al.*, 2009; Zhu *et al.*,

262 2011; Zhang *et al.*, 2016). We were interested in investigating whether *qPE9-1* controlled the  
263 grain-filling process through its effects on plant hormone homeostasis. Therefore, in the  
264 present study, the contents of two plant hormones were measured during grain filling.  
265 Significant changes in the endogenous ABA and IAA contents in the grains were found  
266 during grain filling (Figs. 5a and c). The ABA content increased during the early grain filling  
267 stage until 12 DAF and then decreased until the end of grain filling. The endogenous ABA  
268 content in the *qPE9-1* grains was always higher than that in *qpe9-1* (Fig. 5a). Very similar  
269 patterns of dynamic changes in the IAA content were observed, with the *qPE9-1* grains  
270 having higher IAA levels than *qpe9-1* during the grain-filling stages (Fig. 5c). The transcript  
271 levels of rice *OsNCED5*, which encodes a key enzyme catalyzing ABA biosynthesis [9-cis-  
272 epoxy-carotenoid dioxygenase (*NCED*)], during grain filling were higher in *qPE9-1* than in  
273 *qpe9-1* from 3 to 15 DAF (Fig. 5b). The change in the transcript level of one important IAA  
274 biosynthesis gene (*OsTAR1*) was highly synchronized with changes in the grain IAA level  
275 (Fig. 5d). These results suggest that ABA and IAA may be involved in grain-filling  
276 regulation and that *qPE9-1* may exert its effects by changing the biosynthesis of these  
277 hormones during grain filling.

278

### 279 ***qPE9-1* regulates starch biosynthesis in rice grains by ABA and IAA**

280 To verify the relationships between *qPE9-1* and the plant hormones ABA and IAA during the  
281 grain-filling stages, exogenous ABA and IAA were applied to the developing grains during  
282 the filling stage, and starch accumulation and gene expression were analyzed. As shown in  
283 Fig. 6, all treatments had stimulatory effects on *OsSUS3*, *OsBEI1b* and *OsSSI1a* gene  
284 expression and the activities of their encoded enzymes in the *qPE9-1* grains, but ABA  
285 application had no effects on starch accumulation or gene expression in the *qpe9-1* grains  
286 (i.e., ABA had either inhibitory or no effects on starch accumulation). Compared with *qpe9-1*

287 grains, *qPE9-1* grains showed enhanced starch accumulation upon treatment with either  
288 exogenous ABA or IAA, and this stimulatory effect of IAA was much more significant than  
289 that of ABA (Fig. 6a). Application of IAA and ABA also stimulated *OsSUS3*, *OsBEI1b* and  
290 *OsSSI1a* gene expression and the activities of their encoded enzymes in *qPE9-1* (Figs. 6b and  
291 c). These results indicate that starch accumulation in *qPE9-1* grains is largely, if not  
292 completely, dependent on high ABA and IAA levels.

293

## 294 **Discussion**

295 The rice *DEP1/qPE9-1* gene was formerly identified by two independent research groups as a  
296 gene that controls panicle erectness, grain number per panicle and, consequently, grain yield  
297 (Huang *et al.*, 2009; Zhou *et al.*, 2009). Sequential alignment at the amino acid level showed  
298 that *qPE9-1* was a homolog of *AGG3*, which is a  $\gamma$  subunit of the *Arabidopsis* heterotrimeric  
299 G protein, although its similarity and degree of homology were not as high. *AGG3* is a  
300 recently discovered novel protein that is almost twice as large as a typical  $G_\gamma$  protein. This  
301 protein exhibits a high degree of similarity with canonical  $G_\gamma$  proteins at the N-terminus,  
302 whereas the C-terminus is plant-specific and contains an extremely high number of cysteine  
303 residues (Chakravorty *et al.*, 2011; Botella, 2012). In plants, the  $G_\gamma$  and  $G_\beta$  subunits are  
304 tightly bound physically and exert their effects as a dimer in both the active and inactive  
305 states of the heterotrimeric G protein. Recent studies showed that based on the interaction  
306 between *DEP1/qPE9-1* and *RGB1* ( $G_\beta$  subunit of rice), *DEP1/qPE9-1* is a  $G_\gamma$  protein in rice  
307 (Botella, 2012; Sun *et al.*, 2014).

308 The functions and molecular mechanisms of *DEP1/qPE9-1* as a new  $G_\gamma$  subunit in rice are  
309 largely unknown. Because *DEP1/qPE9-1* has been cloned and identified as a gene controlling  
310 the panicle size and rice shape (Huang *et al.*, 2009; Zhou *et al.*, 2009), we can reasonably

311 assume that *DEP1/qPE9-1* may play important roles in regulating grain development and the  
312 grain-filling process. Rice grain formation and grain filling are rather complicated processes  
313 that involve approximately 21,000 genes, including 269 genes that are closely related to  
314 various physiological and biochemical pathways (Zhu *et al.*, 2003). Proteomic research  
315 indicates that 123 proteins and 43 phosphoproteins are involved in regulation of the grain-  
316 filling process (Zhang *et al.*, 2014). Furthermore, the grain-filling process is also regulated by  
317 plant hormones (e.g., ABA, IAA, cytokinin and ethylene), which fluctuate considerably  
318 during the grain-filling period (Yang *et al.*, 2001; 2003; 2006; Tang *et al.*, 2009). Although  
319 the carbohydrate interconversion biochemical pathway has clearly been elucidated during  
320 grain filling, the biochemical and molecular mechanisms controlling rice grain size and  
321 weight are largely unknown.

322 Overexpression of *Arabidopsis* atypical G<sub>γ</sub> (*AGG3*) promotes seed and organ growth by  
323 increasing cell proliferation, and *AGG3*-mutated lines have a small seed size (Chakravorty *et*  
324 *al.*, 2011; Li *et al.*, 2012; Roy Choudhury *et al.*, 2013). Similar results have been reported for  
325 rice plants. *GRAIN SIZE 3 (GS3)* and *DENSE AND ERECT PANICLE1 (DEP1)/PANICLE*  
326 *ERECTNESS (qPE9-1)* are involved in controlling either the grain size or panicle size in rice  
327 (Fan *et al.*, 2006; Huang *et al.*, 2009; Zhou *et al.*, 2009). However, in contrast to *Arabidopsis*,  
328 *GS3* negatively regulates the grain size, whereas *DEP1/qPE9-1* positively regulates both the  
329 grain and panicle size (Fan *et al.*, 2006; Huang *et al.*, 2009; Zhou *et al.*, 2009). Why this  
330 considerable difference exists between these plant species remains unclear and should be  
331 studied and elucidated in the future.

332 A comparison of the panicle morphology, grain size and final grain weight clearly  
333 indicated that *qpe9-1* had a smaller size and lower grain weight than *qPE9-1*, implying that  
334 *qPE9-1* positively regulated the grain size and final grain weight (Fig. 1). Our previous  
335 research and that conducted by other groups revealed that the grain size and final grain

336 weight were largely determined by two factors/processes: the number and size of endosperm  
337 cells (i.e., the sink size) and the grain-filling process, including the grain-filling rate and  
338 duration (i.e., the sink activity; Liang *et al.*, 2001). The smaller grain size and lower final  
339 grain weight of *qpe9-1* are a result of fewer endosperm cells and lower starch accumulation  
340 after flowering, the latter is partly due to reducing the duration of the grain-filling process  
341 (Figs. 2 and 3). However, the mechanisms underlying how *qPE9-1* controls endosperm cell  
342 proliferation and starch accumulation are unknown.

343 More than ten proteins/enzymes are directly involved in the biochemical pathways of  
344 carbohydrate interconversion and starch biosynthesis during rice grain filling (Tetlow *et al.*,  
345 2004; Ohdan *et al.*, 2005; Zhu *et al.*, 2011). What is the underlying cause of lower starch  
346 accumulation in *qpe9-1* aside from the lower numbers of endosperm cells? In other words, do  
347 significant differences exist in the expression of key protein/enzyme-encoding genes or the  
348 activity of these key enzymes between the two genotypes? To answer these questions, we  
349 compared differences in the expression of genes encoding several key enzymes that catalyzed  
350 carbohydrate interconversion and starch biosynthesis between the two genotypes used in this  
351 experiment. Our results clearly indicate that the lower expression levels of several key genes  
352 that encode enzymes catalyzing starch biosynthesis and the lower activities of these enzymes  
353 in the *qpe9-1* grains during the late grain filling stage are the most important factors resulting  
354 in the lower grain weight (Fig. 4).

355 The grain-filling process is a highly regulated process that involves both genetic and  
356 environmental factors. Plant hormones play important roles in grain growth and development  
357 (Tang *et al.*, 2009; Zhu *et al.*, 2011; Zhang *et al.*, 2016). However, little is known about the  
358 detailed mechanisms by which plant hormones regulate the grain-filling process. Yang *et al.*  
359 (2001) suggested that an altered hormonal balance, especially a decrease in GA and an  
360 increase in ABA, enhanced the remobilization of prestored carbon to the grains and

361 accelerated the grain-filling rate. In addition, IAA treatment increased spikelet growth and  
362 development in distal branches (Patel & Mohapatra, 1992). Recently, studies in peas  
363 provided direct evidence that auxin was required for a normal seed size and starch  
364 accumulation. The mutant of *TAR2*, which is an IAA biosynthesis gene, induces the  
365 formation of small seeds with reduced starch content and a wrinkled phenotype at the dry  
366 stage. Application of the synthetic auxin 2,4-D partially reversed the wrinkled phenotype but  
367 did not restore the starch content of the mutant seeds to that of the WT (McAdam et al.,  
368 2017). Our results showed considerable differences in the dynamics of the endogenous  
369 hormone levels in the grains during grain filling, and the endogenous ABA and IAA levels  
370 were positively related to grain filling during the entire grain-filling stage (Fig. 6). The levels  
371 of these endogenous plant hormones were significantly lower in the *qpe9-1* than in the *qPE9-*  
372 *1* grains during the grain-filling stages (Figs. 5a and c). Based on the effects of exogenous  
373 ABA and IAA on starch accumulation and the expression of genes that encode several key  
374 enzymes catalyzing starch biosynthesis, we conclude that the positive control of *qPE9-1* on  
375 the grain-filling process occurs largely through the biosynthesis of endogenous plant  
376 hormones.

377 Rice grain filling is a very complicated process that involves photoassimilate (mainly  
378 sucrose) translocation from photosynthetic sources (i.e., leaves and leaf sheaths), sucrose  
379 degradation, transmembrane transport and starch synthesis in the grains (i.e., the sink, Liang  
380 et al., 2001; Lü et al., 2008; Tang et al., 2009). Approximately twenty enzymes/proteins have  
381 been reported to be involved in these biochemical processes (Tetlow et al., 2004; Ohdan et  
382 al., 2005; Zhu et al., 2003). However, the mechanism of starch biosynthesis regulation in  
383 grains is not well understood. This research showed that the novel G protein  $\gamma$  subunit *qPE9-*  
384 *1* increased the numbers of endosperm cells and positively regulated starch biosynthesis,  
385 which enhanced the grain size and weight. *qPE9-1* also enhanced the accumulation of ABA



386 and IAA. In turn, these hormones regulate the expression of genes encoding several key  
387 enzymes that catalyze starch biosynthesis during the late grain filling stage and consequently  
388 affect the final grain weight.

389

## 390 **Supplementary Data**

391 **Figure S1.** The evaluation of antibody valence. **a** Analysis of the RGB1 protein using a  
392 RGB1 antibody; **b** Analysis of a peptide fragment of the DEP1/qPE9-1 protein using a  
393 DEP1/qPE9-1 antibody; **c** Detection of the His-tagged DEP1/qPE9-1 protein using both  
394 DEP1/qPE9-1 and His tag antibodies.

395

## 396 **Acknowledgements**

397 We thank Dr. Cunxu Wei (Yangzhou University) for the fruitful discussions and valuable  
398 suggestions on this study.

399

## 400 **Reference**

401 **Botella JR.** 2012. Can heterotrimeric G proteins help to feed the world? Trends in Plant  
402 Science 17, 563–568

403 **Chakravorty D, Trusov Y, Zhang W, Acharya BR, Sheahan MB, McCurdy DW,**

404 **Assmann SM, Botella JR.** 2011. An atypical heterotrimeric G-protein  $\gamma$ -subunit is involved  
405 in guard cell K<sup>+</sup>-channel regulation and morphological development in *Arabidopsis thaliana*.

406 Plant Journal 67, 840–851

- 407 **Fan C, Xing Y, Mao H, Lu T, Han B, Xu C, Li X, Zhang Q.** 2006. *GS3*, a major QTL for  
408 grain length and weight and minor QTL for grain width and thickness in rice, encodes a  
409 putative transmembrane protein. *Theoretical and Applied Genetics* 112, 1164–1171
- 410 **Huang X, Qian Q, Liu Z, Sun H, He S, Luo D, Xia G, Chu C, Li J, Fu X.** 2009. Natural  
411 variation at the *DEP1* locus enhances grain yield in rice. *Nature Genetics* 41, 494–497
- 412 **Jiang D, Cao W, Dai T, Jing Q.** 2003. Activities of key enzymes for starch synthesis in  
413 relation to growth of superior and inferior grains on winter wheat (*Triticum aestivum* L.)  
414 spike. *Plant Growth Regulation* 41, 247–257
- 415 **Keeling PL, Myers AM.** 2010. Biochemistry and genetics of starch synthesis. *Annual*  
416 *Review of Food Science and Technology* 1, 271–303
- 417 **Li S, Liu Y, Zheng L, et al.** 2012. The plant-specific G protein  $\gamma$  subunit AGG3 influences  
418 organ size and shape in *Arabidopsis thaliana*. *New Phytologist* 194, 690–703
- 419 **Liang J, Zhang J, Cao X.** 2001. Grain sink strength may be related to the poor grain filling  
420 of *indica-japonica* rice (*Oryza sativa*) hybrids. *Physiologia Plantarum* 112, 470–477
- 421 **Lü B, Guo Z, Liang J.** 2008. Effects of the activities of key enzymes involved in starch  
422 biosynthesis on the fine structure of amylopectin in developing rice (*Oryza sativa* L.)  
423 endosperms. *Science in China. Series C* 51, 863–871
- 424 **McAdam EL, Meitzel T, Quittenden LJ, Davidson SE, Dalmais M, Bendahmane AI, et**  
425 **al.** 2017. Evidence that auxin is required for normal seed size and starch synthesis in pea.  
426 *New Phytologist* 216, 193–204
- 427 **Milligan G, Kostenis E.** 2006. Heterotrimeric G-proteins: a short history. *British Journal of*  
428 *Pharmacology* 147 Suppl 1, S46–55
- 429 **Nakamura Y, Yuki K, Park S-Y, Ohya T.** 1989. Carbohydrate Metabolism in the  
430 Developing Endosperm of Rice Grains. *Plant and Cell Physiology* 30, 833–839

- 431 **Ohdan T, Francisco PB, Sawada T, Hirose T, Terao T, Satoh H, Nakamura Y.** 2005.  
432 Expression profiling of genes involved in starch synthesis in sink and source organs of rice.  
433 *Journal of Experimental Botany* 56, 3229–3244
- 434 **Orozco-Arroyo G, Paolo D, Ezquer I, Colombo L.** 2015. Networks controlling seed size in  
435 *Arabidopsis*. *Plant Reproduction* 28, 17–32
- 436 **Patel R, Mohapatra PK.** 1992. Regulation of spikelet development in rice by hormones.  
437 *Journal of Experimental Botany* 43, 257–262
- 438 **Roy Choudhury S, Riesselman AJ, Pandey S.** 2013. Constitutive or seed-specific  
439 overexpression of *Arabidopsis G-protein  $\gamma$  subunit 3 (AGG3)* results in increased seed and oil  
440 production and improved stress tolerance in *Camelina sativa*. *Plant Biotechnology Journal* 12,  
441 49–59
- 442 **Singh BK, Jenner CF.** 1982. A modified method for the determination of cell number in  
443 wheat endosperm. *Plant Science Letters* 26, 273–278
- 444 **Sun H, Qian Q, Wu K, Luo J, Wang S, Zhang C, Ma Y, Liu Q, Huang X, Yuan Q, et al.**  
445 2014. Heterotrimeric G proteins regulate nitrogen-use efficiency in rice. *Nature Genetics* 46,  
446 652–656
- 447 **Tang T, Xie H, Wang Y, Lü B, Liang J.** 2009. The effect of sucrose and abscisic acid  
448 interaction on sucrose synthase and its relationship to grain filling of rice (*Oryza sativa* L.).  
449 *Journal of Experimental Botany* 60, 2641–2652
- 450 **Tetlow IJ, Morell MK, Emes MJ.** 2004. Recent developments in understanding the  
451 regulation of starch metabolism in higher plants. *Journal of Experimental Botany* 55, 2131–  
452 2145
- 453 **Urano D, Alan AM.** 2014. Heterotrimeric G Protein-Coupled Signaling in Plants. *Annual*  
454 *Review of Plant Biology* 65, 365–84

- 455 **Urano D, Chen J-G, Botella JR, Jones AM.** 2013. Heterotrimeric G protein signalling in  
456 the plant kingdom. *Open biology* 3, 120186
- 457 **Wang J-C, Xu H, Zhu Y, Liu Q-Q, Cai X-L.** 2013. OsbZIP58, a basic leucine zipper  
458 transcription factor, regulates starch biosynthesis in rice endosperm. *Journal of Experimental*  
459 *Botany* 64, 3453–3466
- 460 **Yang J, Zhang J, Wang Z, Zhu Q.** 2003. Hormones in the grains in relation to sink strength  
461 and postanthesis development of spikelets in rice. *Plant Growth Regulation* 41, 185–195
- 462 **Yang J, Zhang J, Wang Z, Liu K, Wang P.** 2006. Post-anthesis development of inferior  
463 and superior spikelets in rice in relation to abscisic acid and ethylene. *Journal of*  
464 *Experimental Botany* 57, 149–160
- 465 **Yang J, Zhang J, Wang Z, Zhu Q, Wang W.** 2001. Hormonal changes in the grains of rice  
466 subjected to water stress during grain filling. *Plant Physiology* 127, 315–323
- 467 **Zeeman SC, Kossmann J, Smith AM.** 2010. Starch: its metabolism, evolution, and  
468 biotechnological modification in plants. *Annual Review of Plant Biology* 61, 209–234
- 469 **Zhang W, Cao Z, ZHOU Q, Chen J, Xu G, Gu J, Liu L, Wang Z, Yang J, Zhang H.**  
470 2016, Grain Filling Characteristics and Their Relations with Endogenous Hormones in  
471 Large- and Small-Grain Mutants of Rice. *PLoS ONE* 11, e0165321
- 472 **Zhang Z, Zhao H, Tang J, Li Z, Li Z, Chen D, Lin W.** 2014. A proteomic study on  
473 molecular mechanism of poor grain-filling of rice (*Oryza sativa* L.) inferior spikelets. *PLoS*  
474 *ONE* 9, e89140
- 475 **Zhou Y, Zhu J, Li Z, Yi C, Liu J, Zhang H, Tang S, Gu M, Liang G.** 2009. Deletion in a  
476 quantitative trait gene *qPE9-1* associated with panicle erectness improves plant architecture  
477 during rice domestication. *Genetics* 183, 315–324
- 478 **Zhu G, Ye N, Yang J, Peng X, Zhang J.** 2011. Regulation of expression of starch synthesis  
479 genes by ethylene and ABA in relation to the development of rice inferior and superior  
480 spikelets. *Journal of Experimental Botany* 62, 3907–3916

481 **Zhu T, Budworth P, Chen W, Provart N, Chang H-S, Guimil S, Su W, Estes B, Zou G,**  
482 **Wang X.** 2003. Transcriptional control of nutrient partitioning during rice grain filling. *Plant*  
483 *Biotechnology Journal* 1, 59–70

484

## 485 **Figure Legends**

486 **Figure 1. Grain performance of *qpe9-1* and *qPE9-1*.** **a** Grain length; **b** Grain width; **c**  
487 Brown rice during grain development; **d** qPE9-1 protein expression in grains at 5 DAF was  
488 analyzed by incubating isolated proteins with polyclonal antibodies against qPE9-1 or RGB1  
489 (as a loading control); **e** *qPE9-1* gene expression was monitored in grains at 5 DAF using  
490 qRT-PCR (n=3); **f** Comparisons between *qpe9-1* and *qPE9-1* with respect to the grain length,  
491 width and thickness; **g** The 1000-grain weight (n=3). DAF, days after flowering. Data are  
492 presented as the mean  $\pm$  SD. “\*” represents a significant difference at  $P < 0.05$ .

493

494 **Figure 2. Histological analyses of endosperms at maturity and changes in endosperm**  
495 **size after fertilization in *qpe9-1* and *qPE9-1*.** **a** Cross-sections of the endosperm between  
496 the dorsal and central points showing the cell sizes and numbers. Scale bars, 100  $\mu$ m; **b**  
497 Comparison of cell numbers in the endosperm cross-sections (n=5 endosperms from 5  
498 panicles); **c** Changes in the numbers of endosperm cells during grain filling (n=10  
499 endosperms from 5 panicles); **d** The long and short axes of endosperm cells during grain  
500 development. Data are presented as the mean  $\pm$  SD. “\*” represents a significant difference at  
501  $P < 0.05$ .

502

503 **Figure 3. Starch accumulation during grain filling.** **a** Starch accumulation of grains during  
504 the grain-filling stages (n=5); **b** The rate of starch accumulation during grain filling; **c** The

505 total starch content in the flour (n=5). Data are presented as the mean  $\pm$  SD. “\*” represents a  
506 significant difference at  $P < 0.05$ .

507

508 **Figure 4. Expression of several starch biosynthesis genes and changes in the activities of**  
509 **these enzymes during grain filling. a** *OsSUS3*, *OsSSIIa* and *OsBEIIb* expression levels  
510 during grain filling (n=3); **b** Changes in the SUS, SS and BE activities during grain filling  
511 (n=3), 1 U= 1  $\mu\text{g}/\text{min}/\text{mg}$  protein. Data are presented as the mean  $\pm$  SD. “\*” represents a  
512 significant difference at  $P < 0.05$ .

513

514 **Figure 5. Changes in the ABA and IAA contents and the expression of genes encoding**  
515 **key enzymes catalyzing their biosynthesis during grain filling. a** Changes in the ABA  
516 level in rice endosperm cells during seed development (n=3); **b** Changes in the expression  
517 profile of the ABA synthesis gene *OsNCED5* in rice endosperm cells during seed  
518 development (n=3); **c** Changes in the IAA levels in rice endosperm cells during seed  
519 development (n=3); **d** Changes in the expression profile of the IAA synthesis gene *OsTARI*  
520 in rice endosperm cells during seed development (n=3). Data are presented as the mean  $\pm$  SD.  
521 “\*” represents a significant difference at  $P < 0.05$ .

522

523

524 **Figure 6. Effects of exogenous ABA and IAA applications on starch biosynthesis. a**  
525 Effects of exogenous ABA and IAA on starch accumulation (n=5); **b** Effects of exogenous  
526 ABA and IAA on the SUS, SS and BE activities at 21 DAF (n=3), 1 U= 1  $\mu\text{g}/\text{min}/\text{mg}$  protein;  
527 **c** Effects of exogenous ABA and IAA on *OsSUS3*, *OsSSIIa* and *OsBEIIb* expression at 21  
528 DAF (n=3). Data are presented as the mean  $\pm$  SD. “\*” represents a significant difference at  $P$   
529  $< 0.05$ .

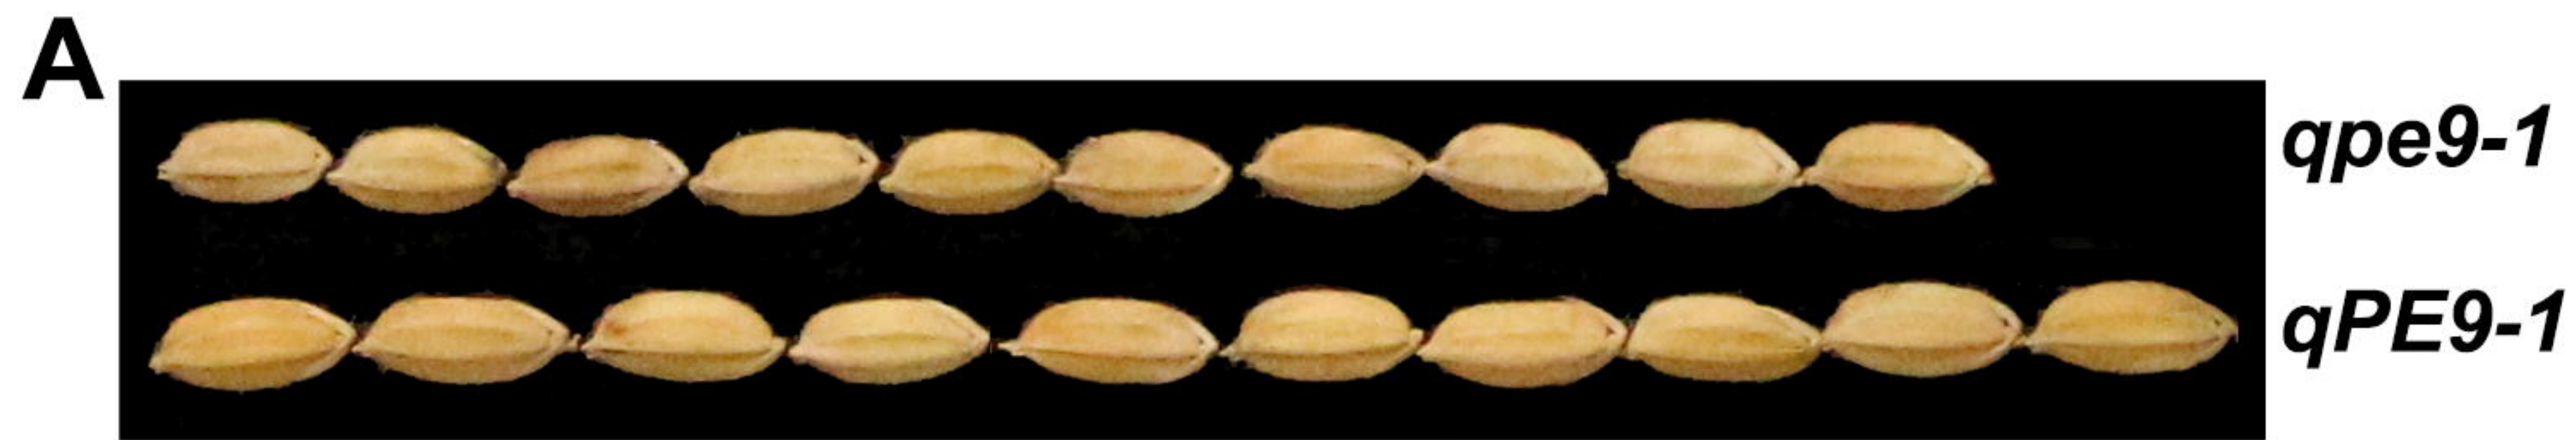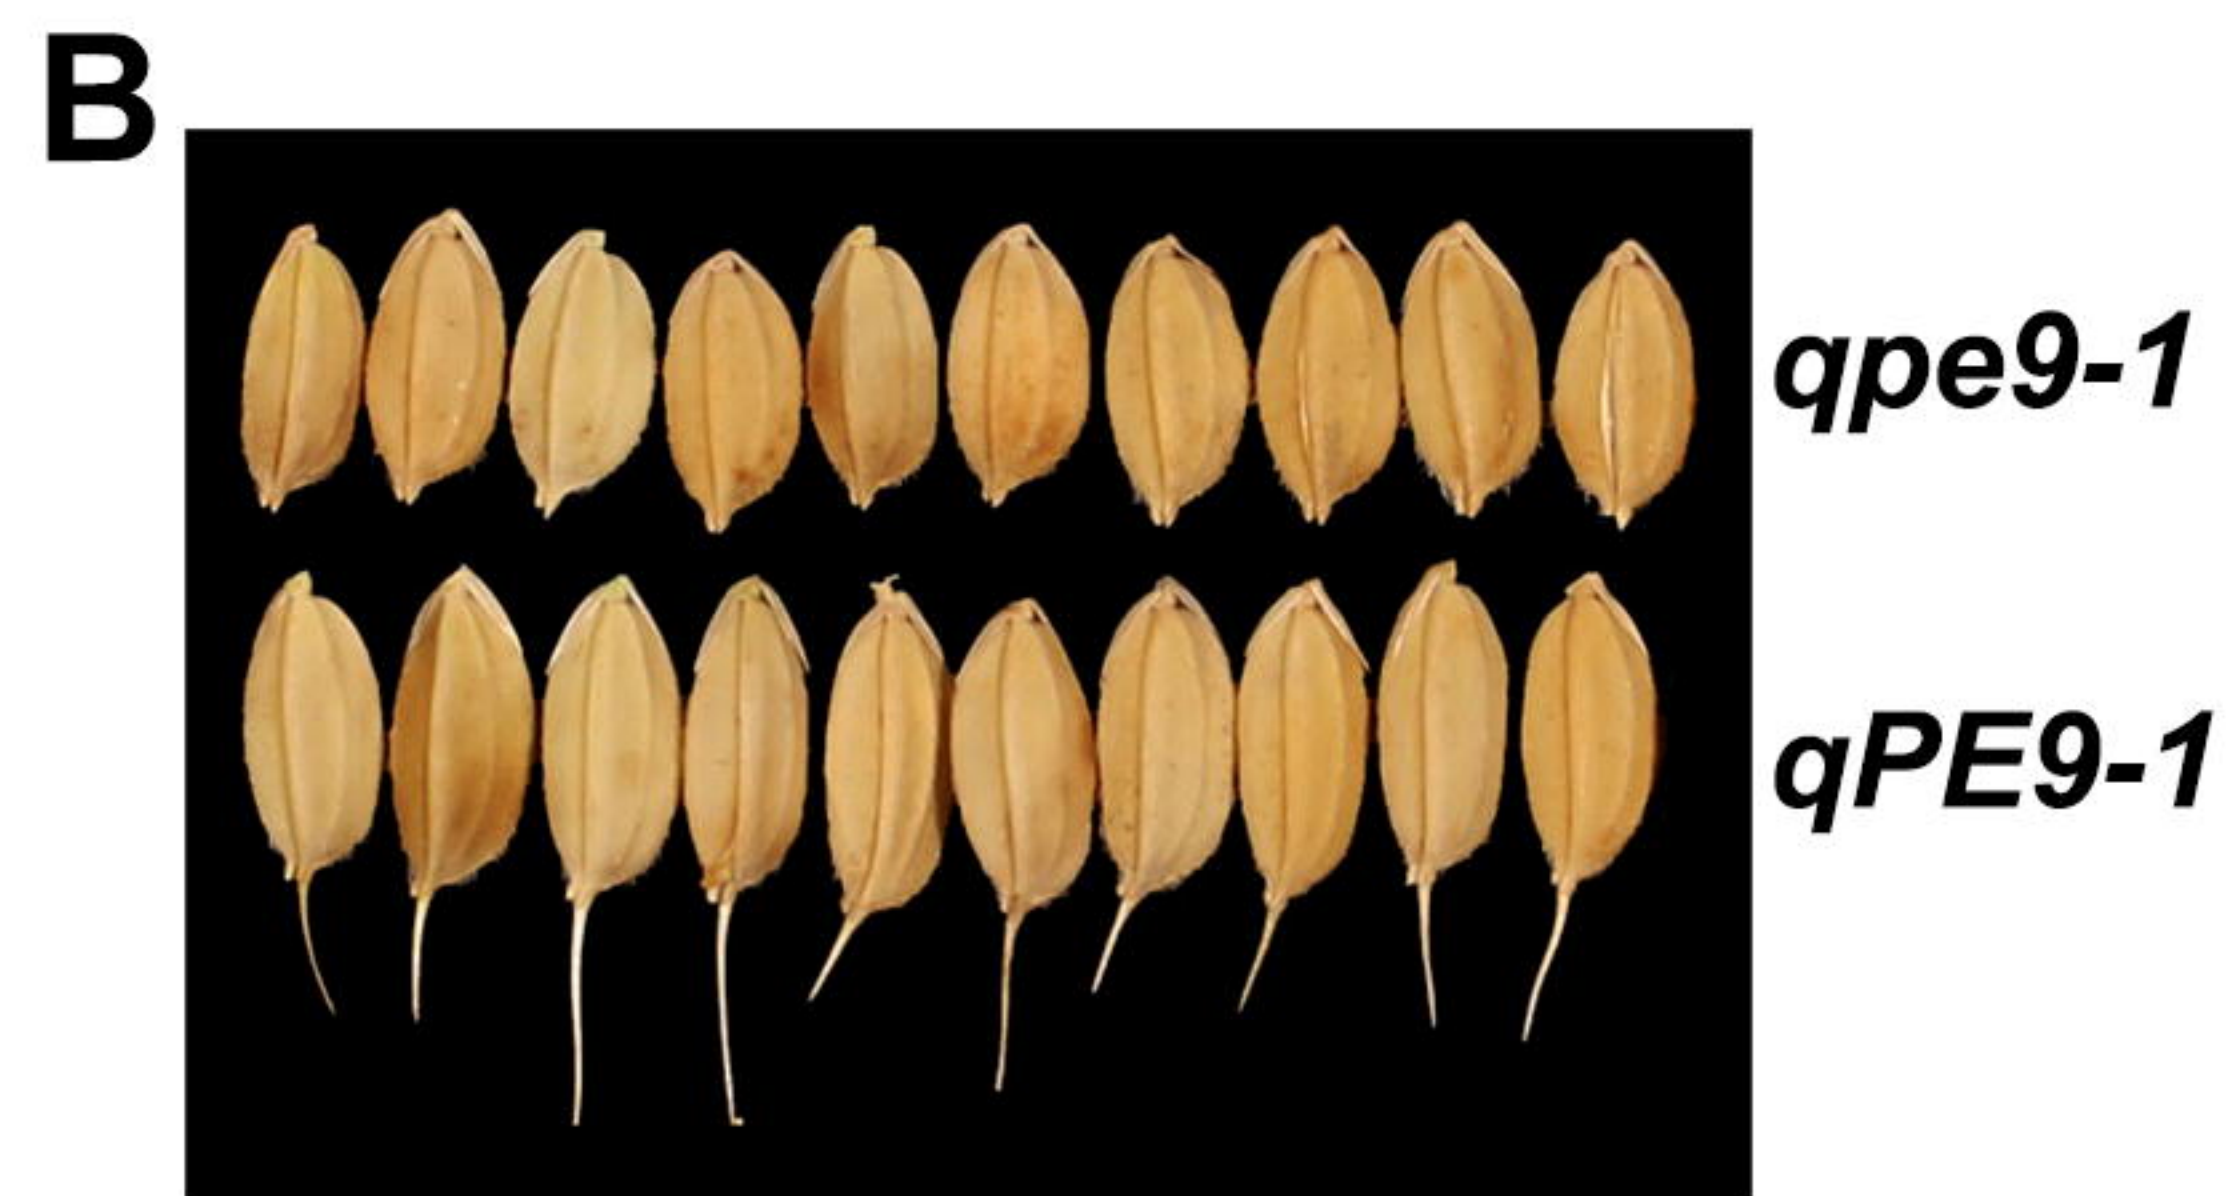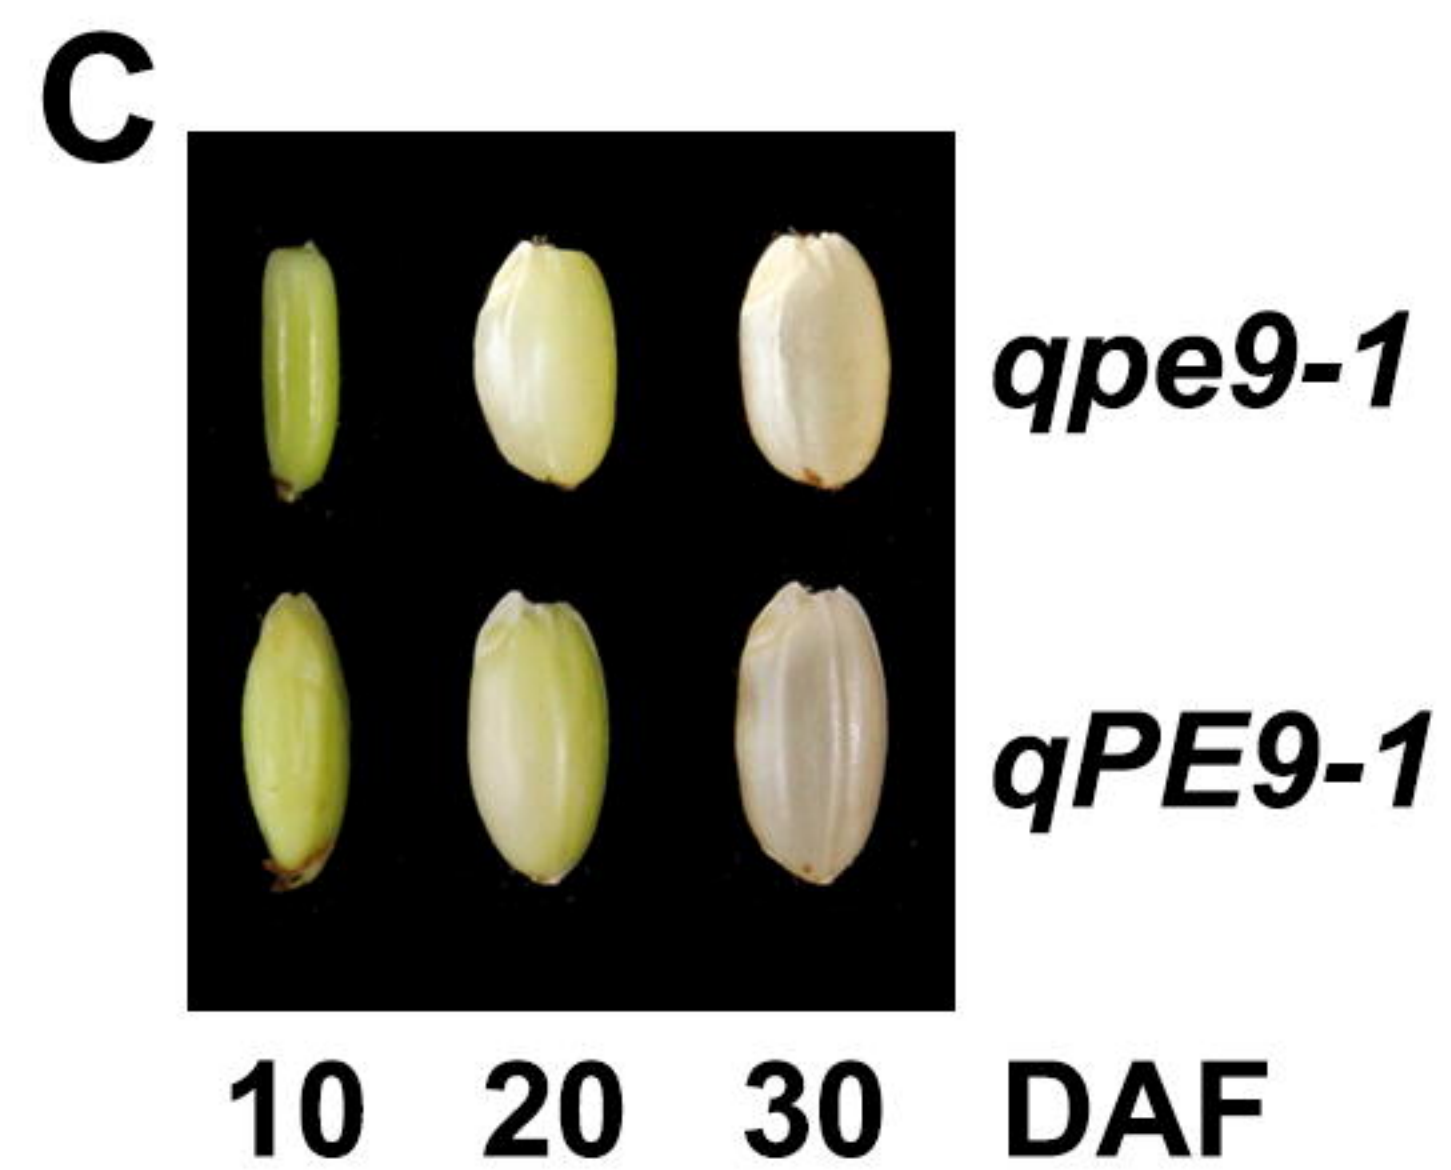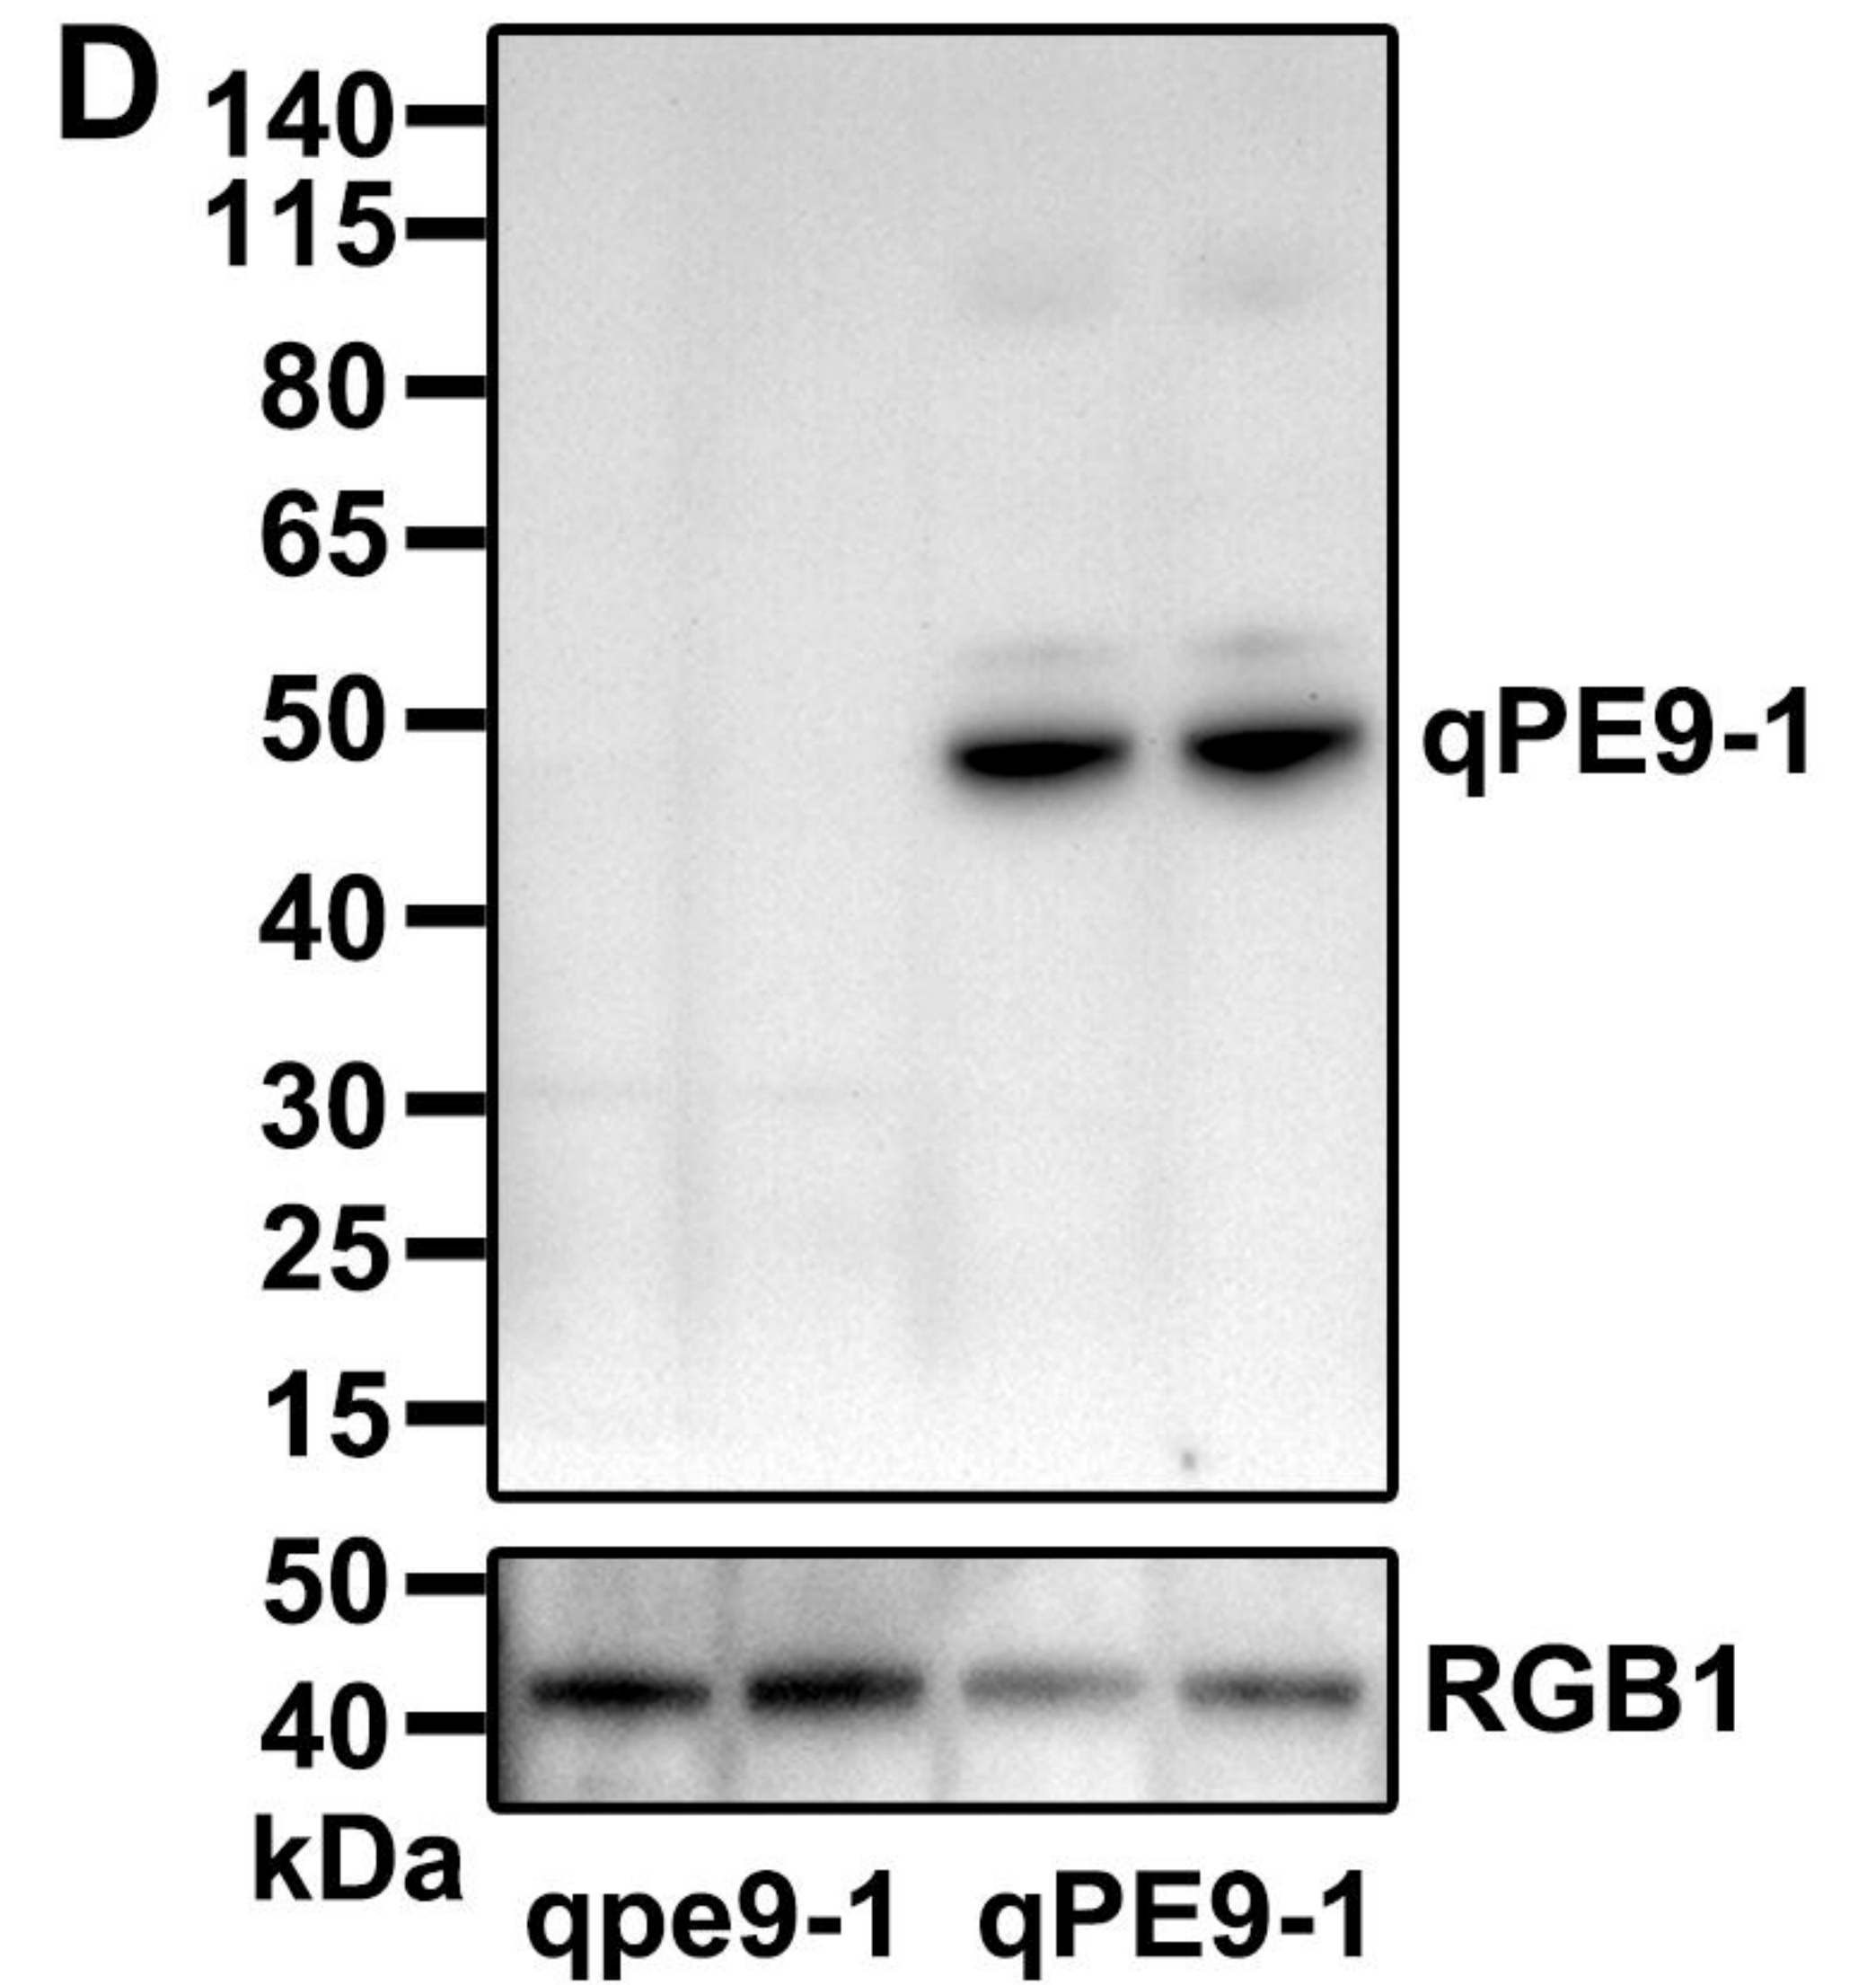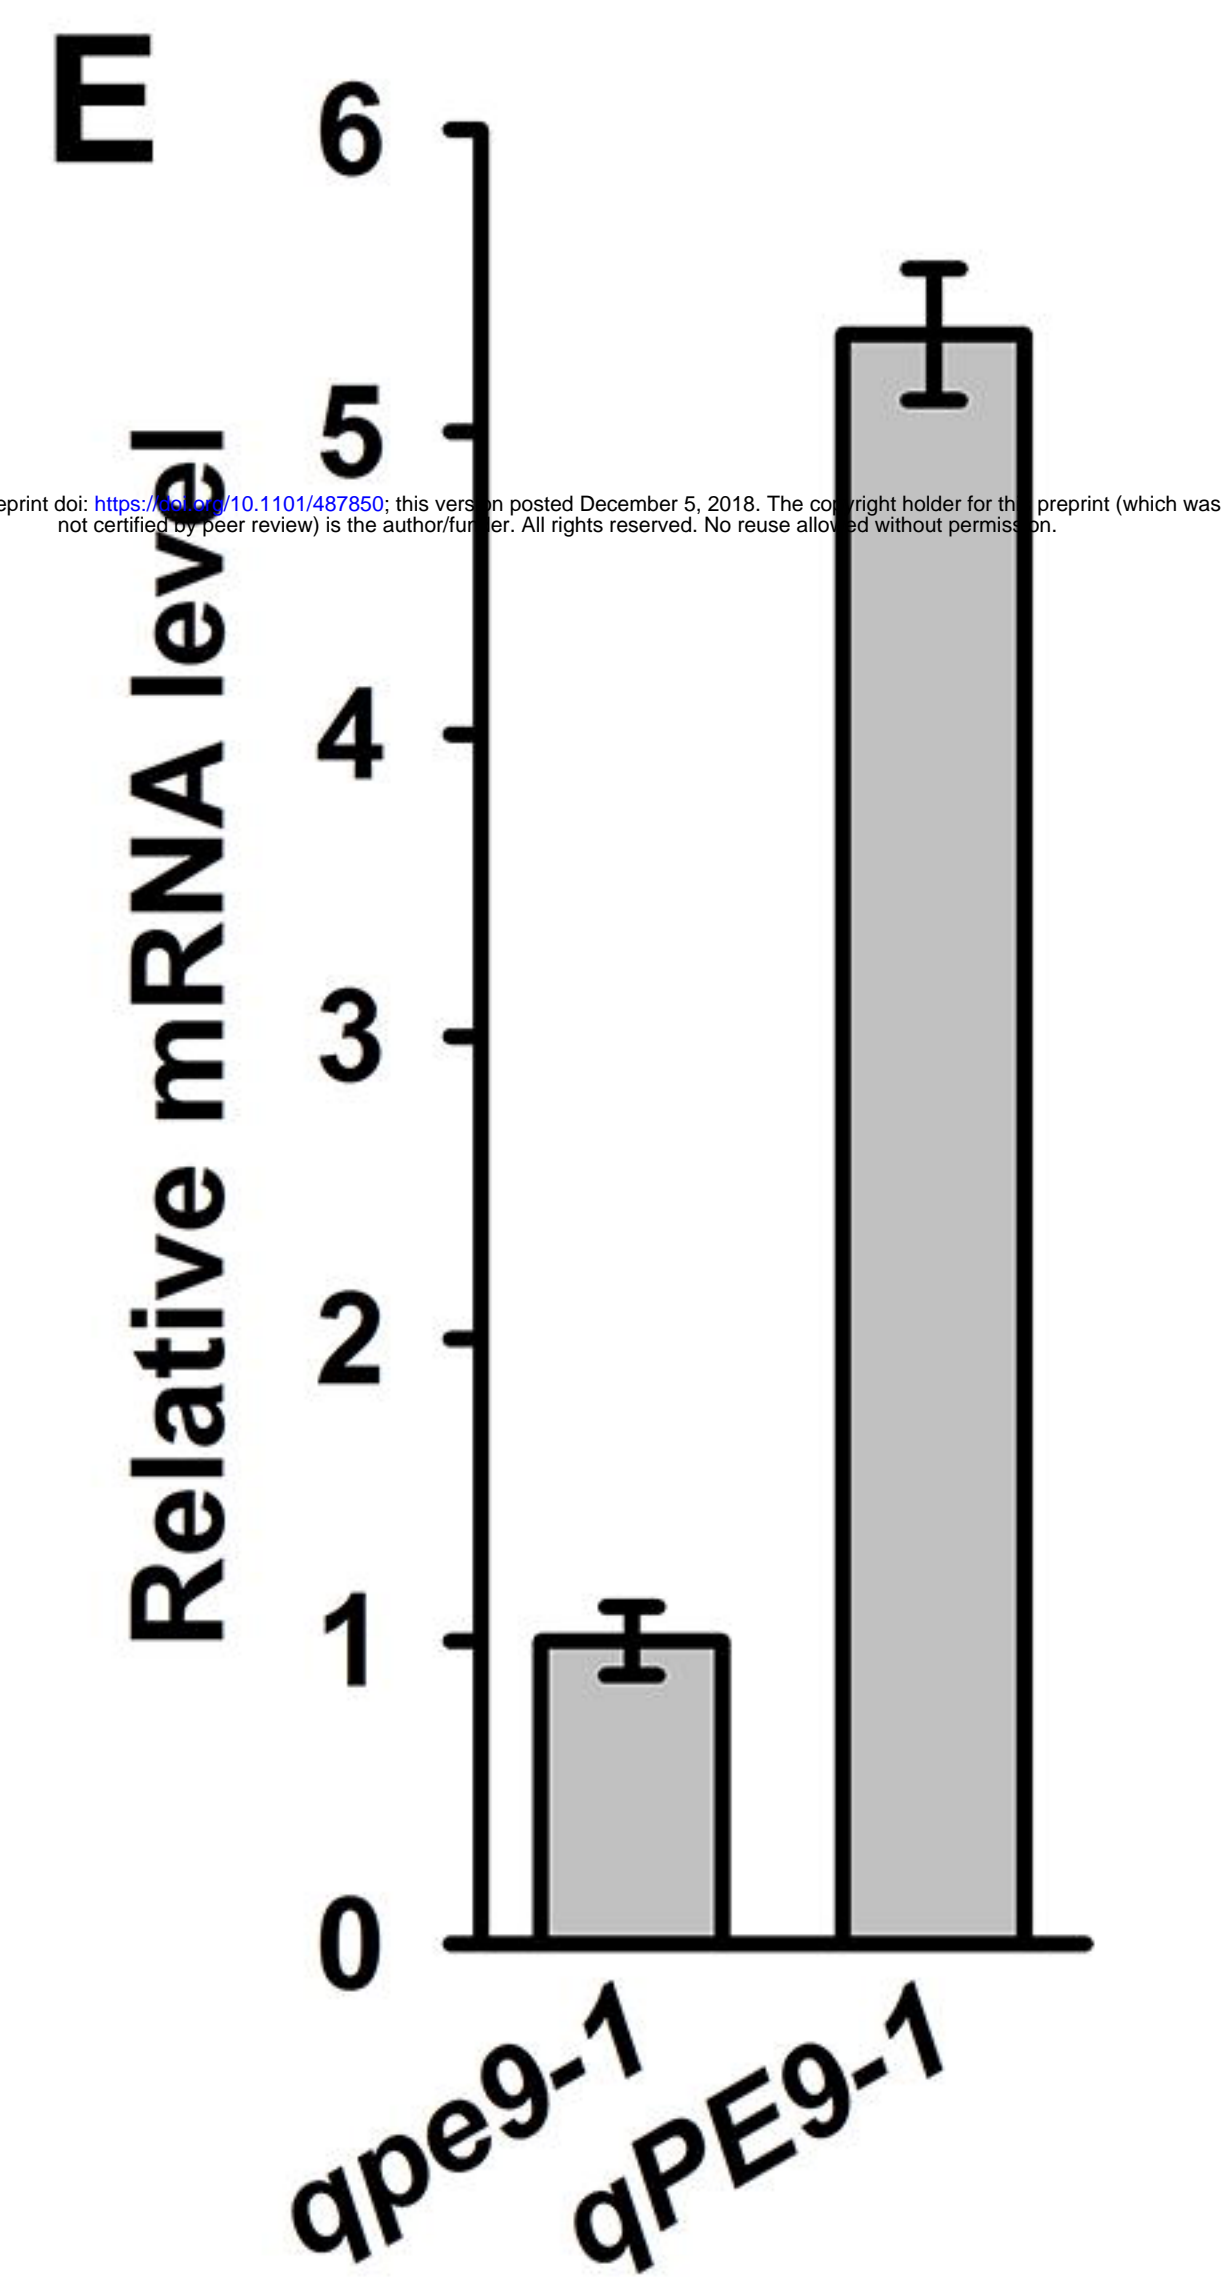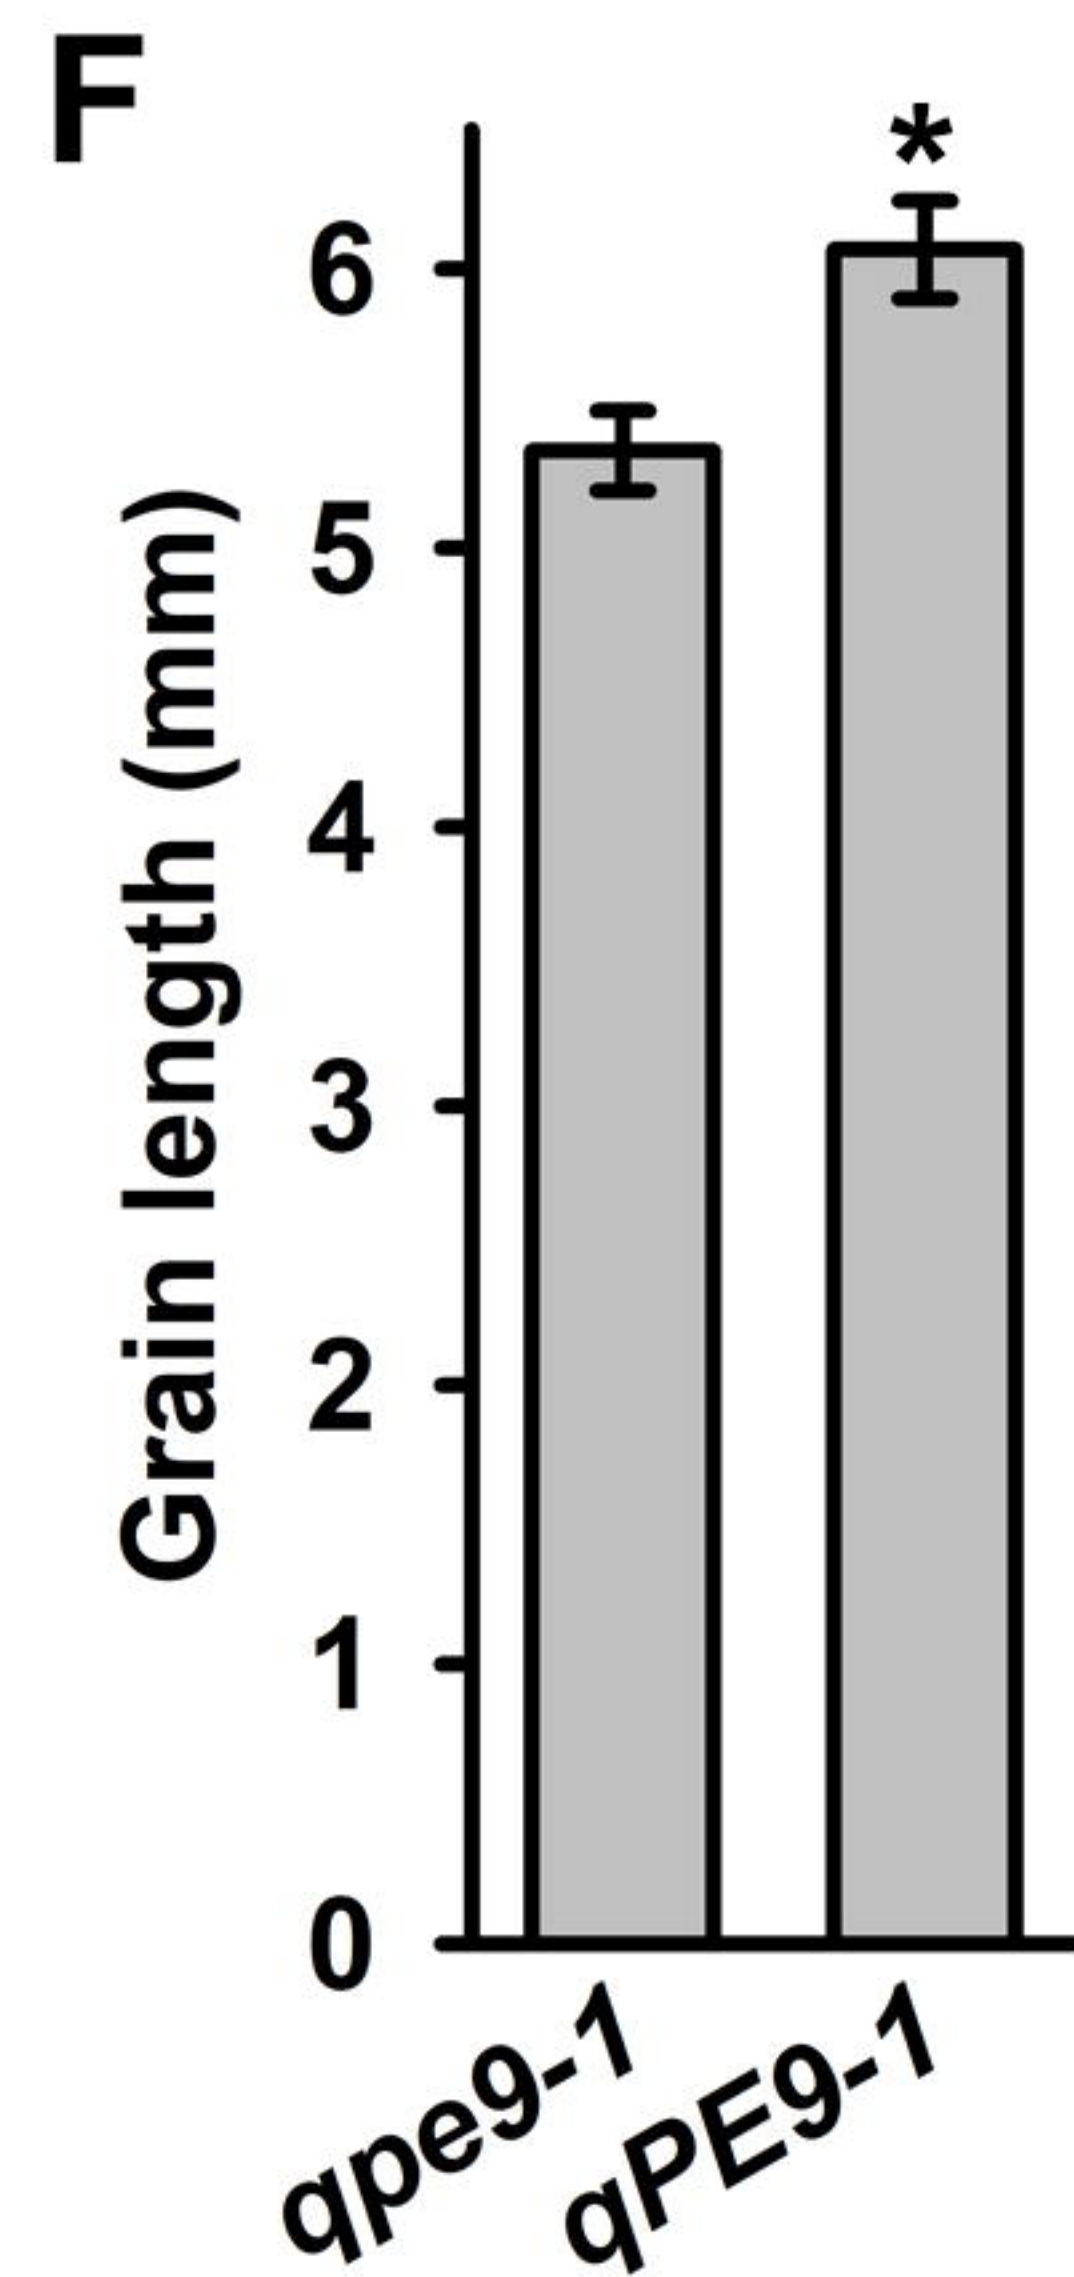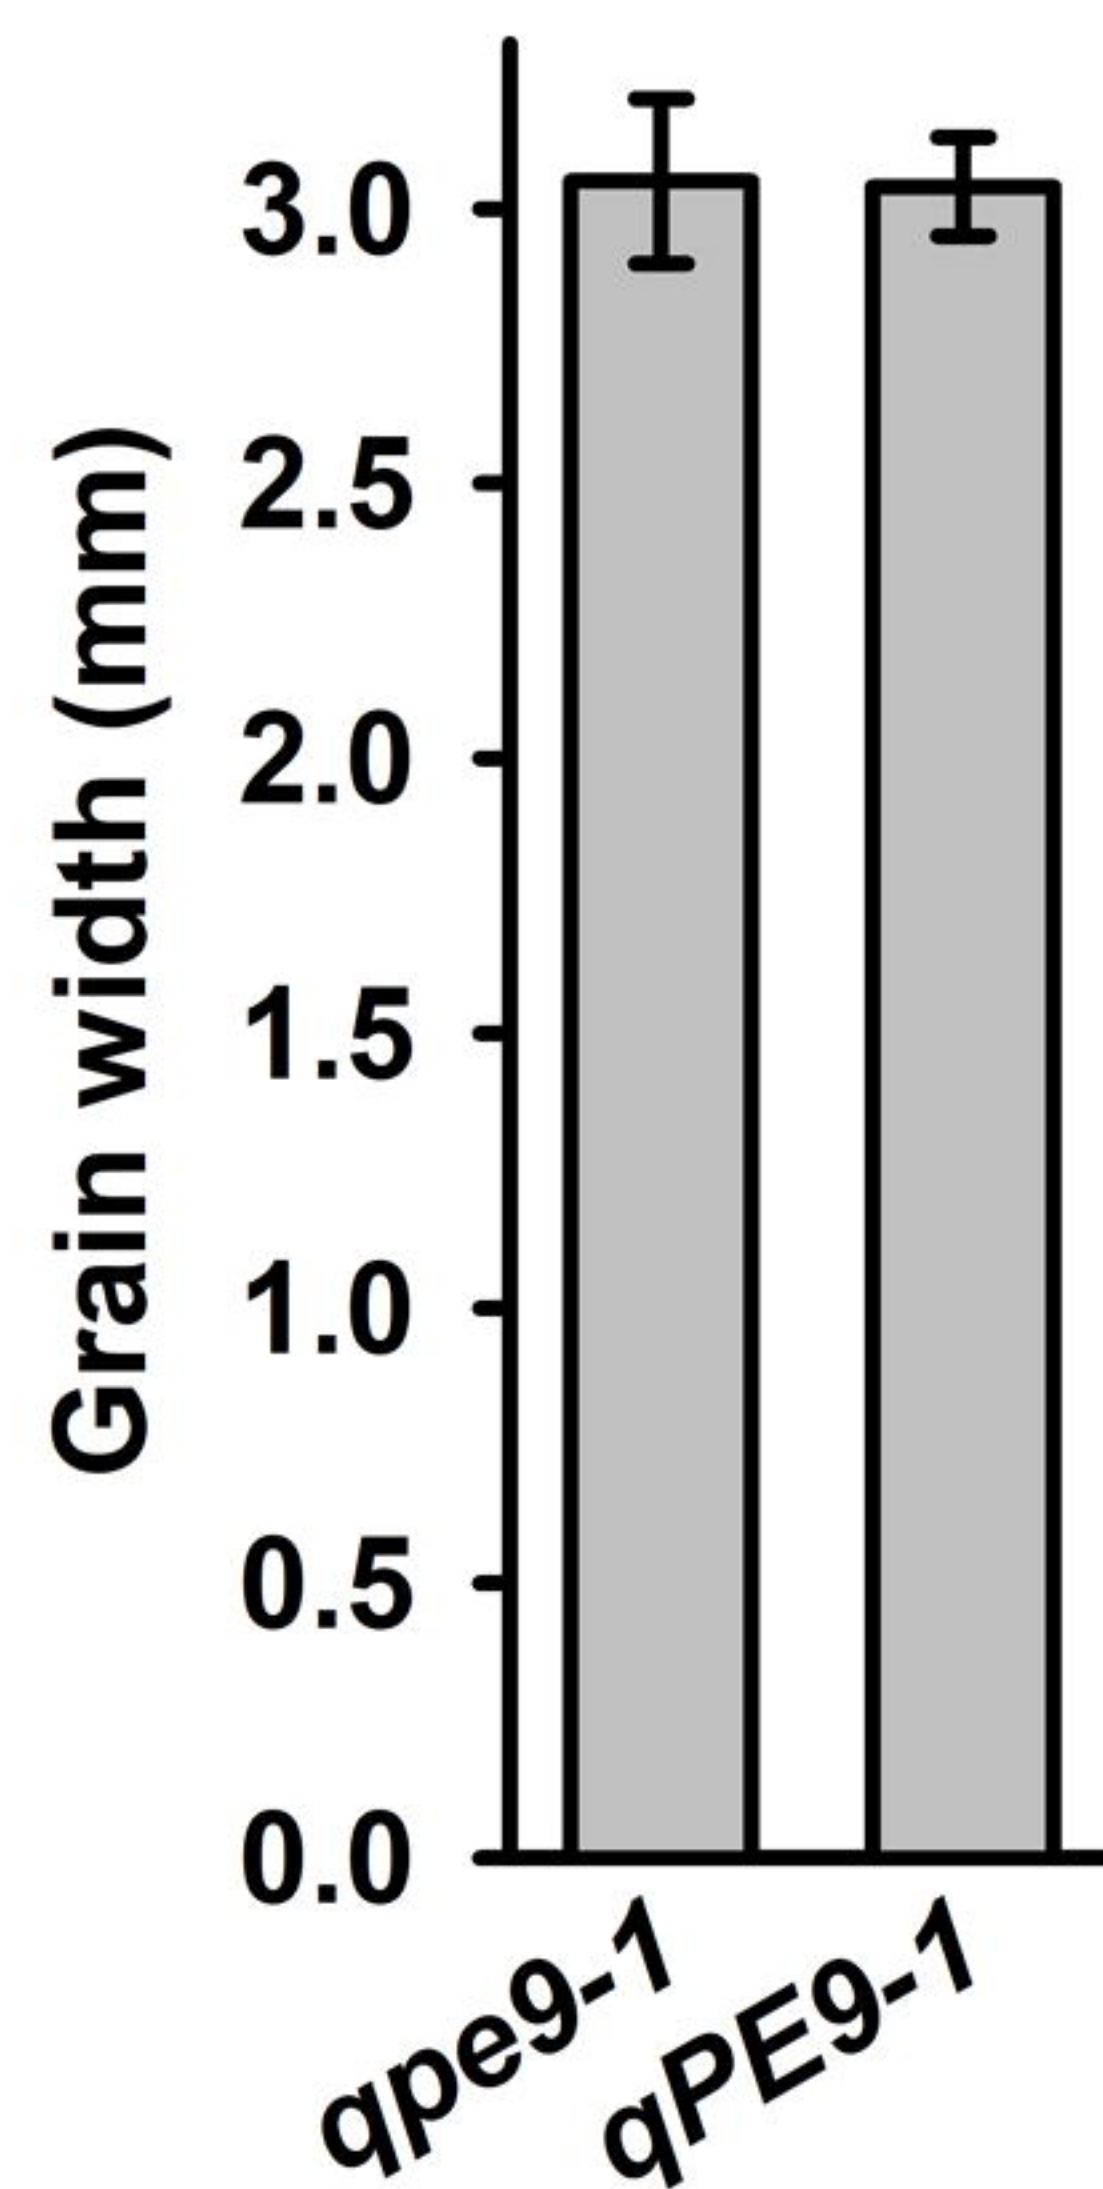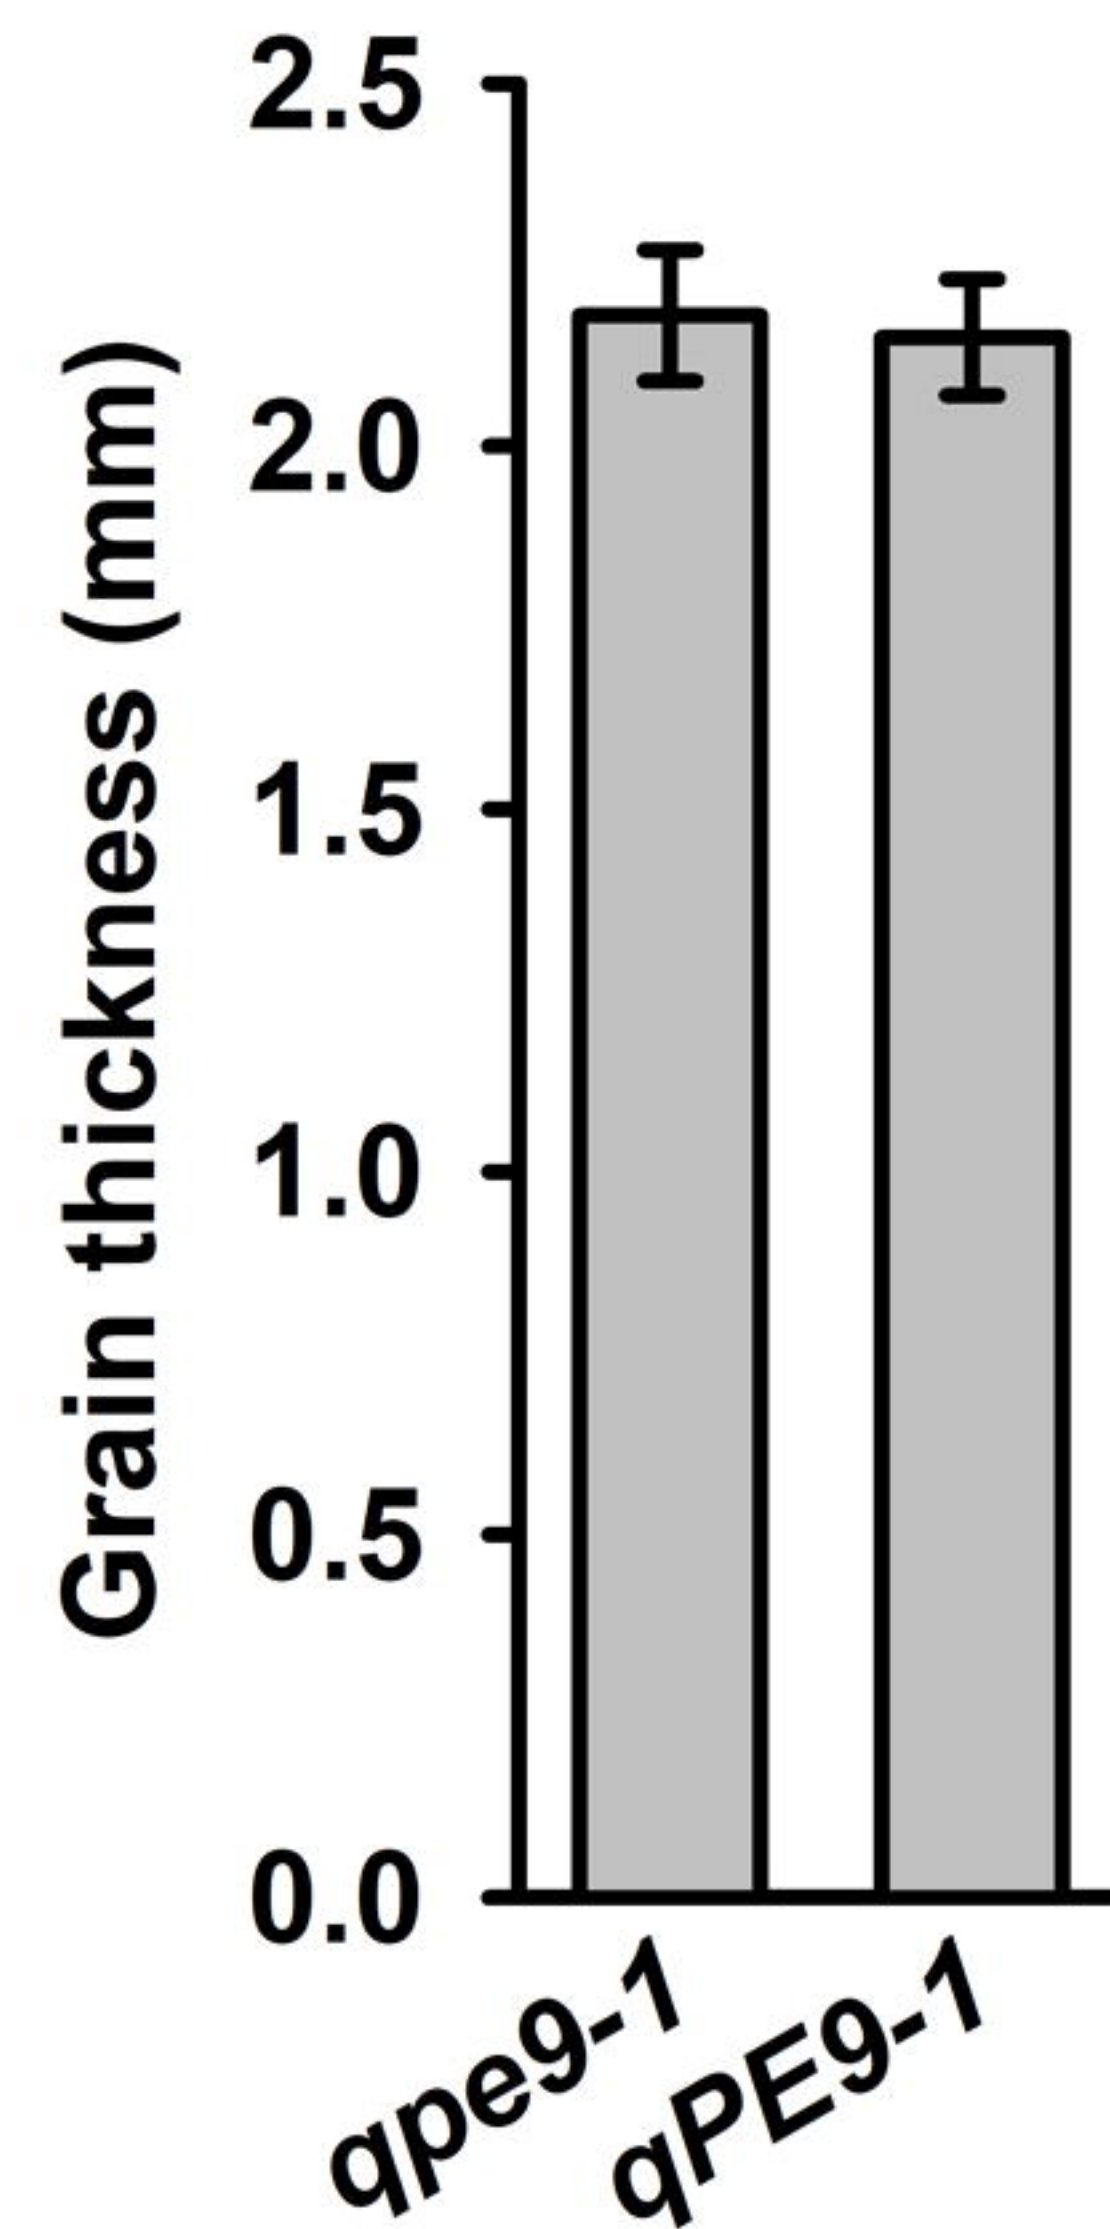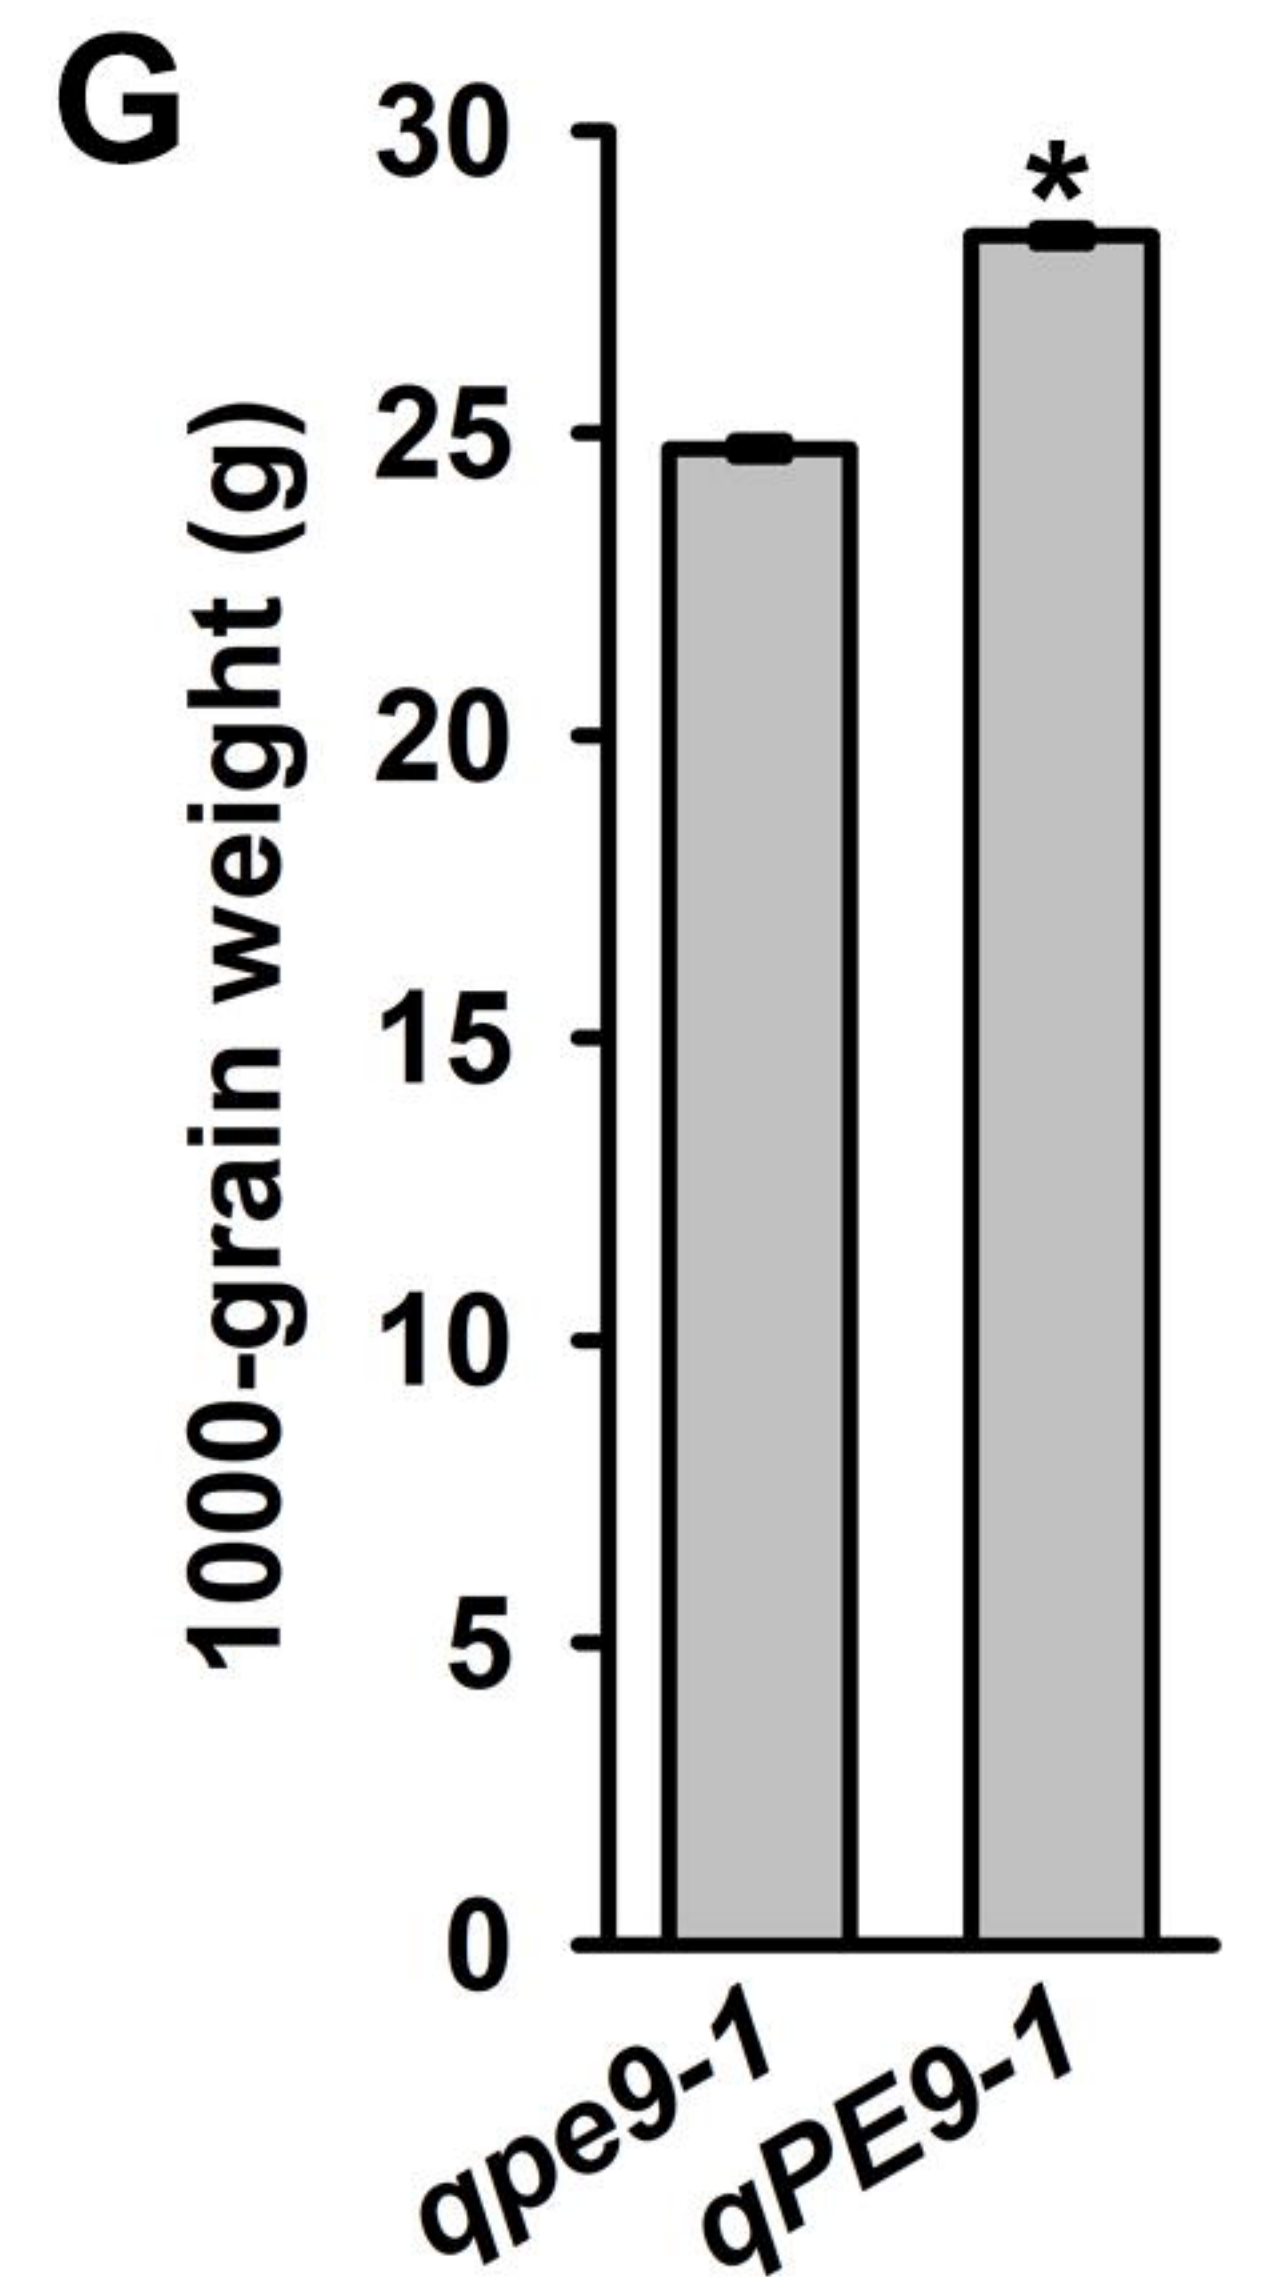

**A**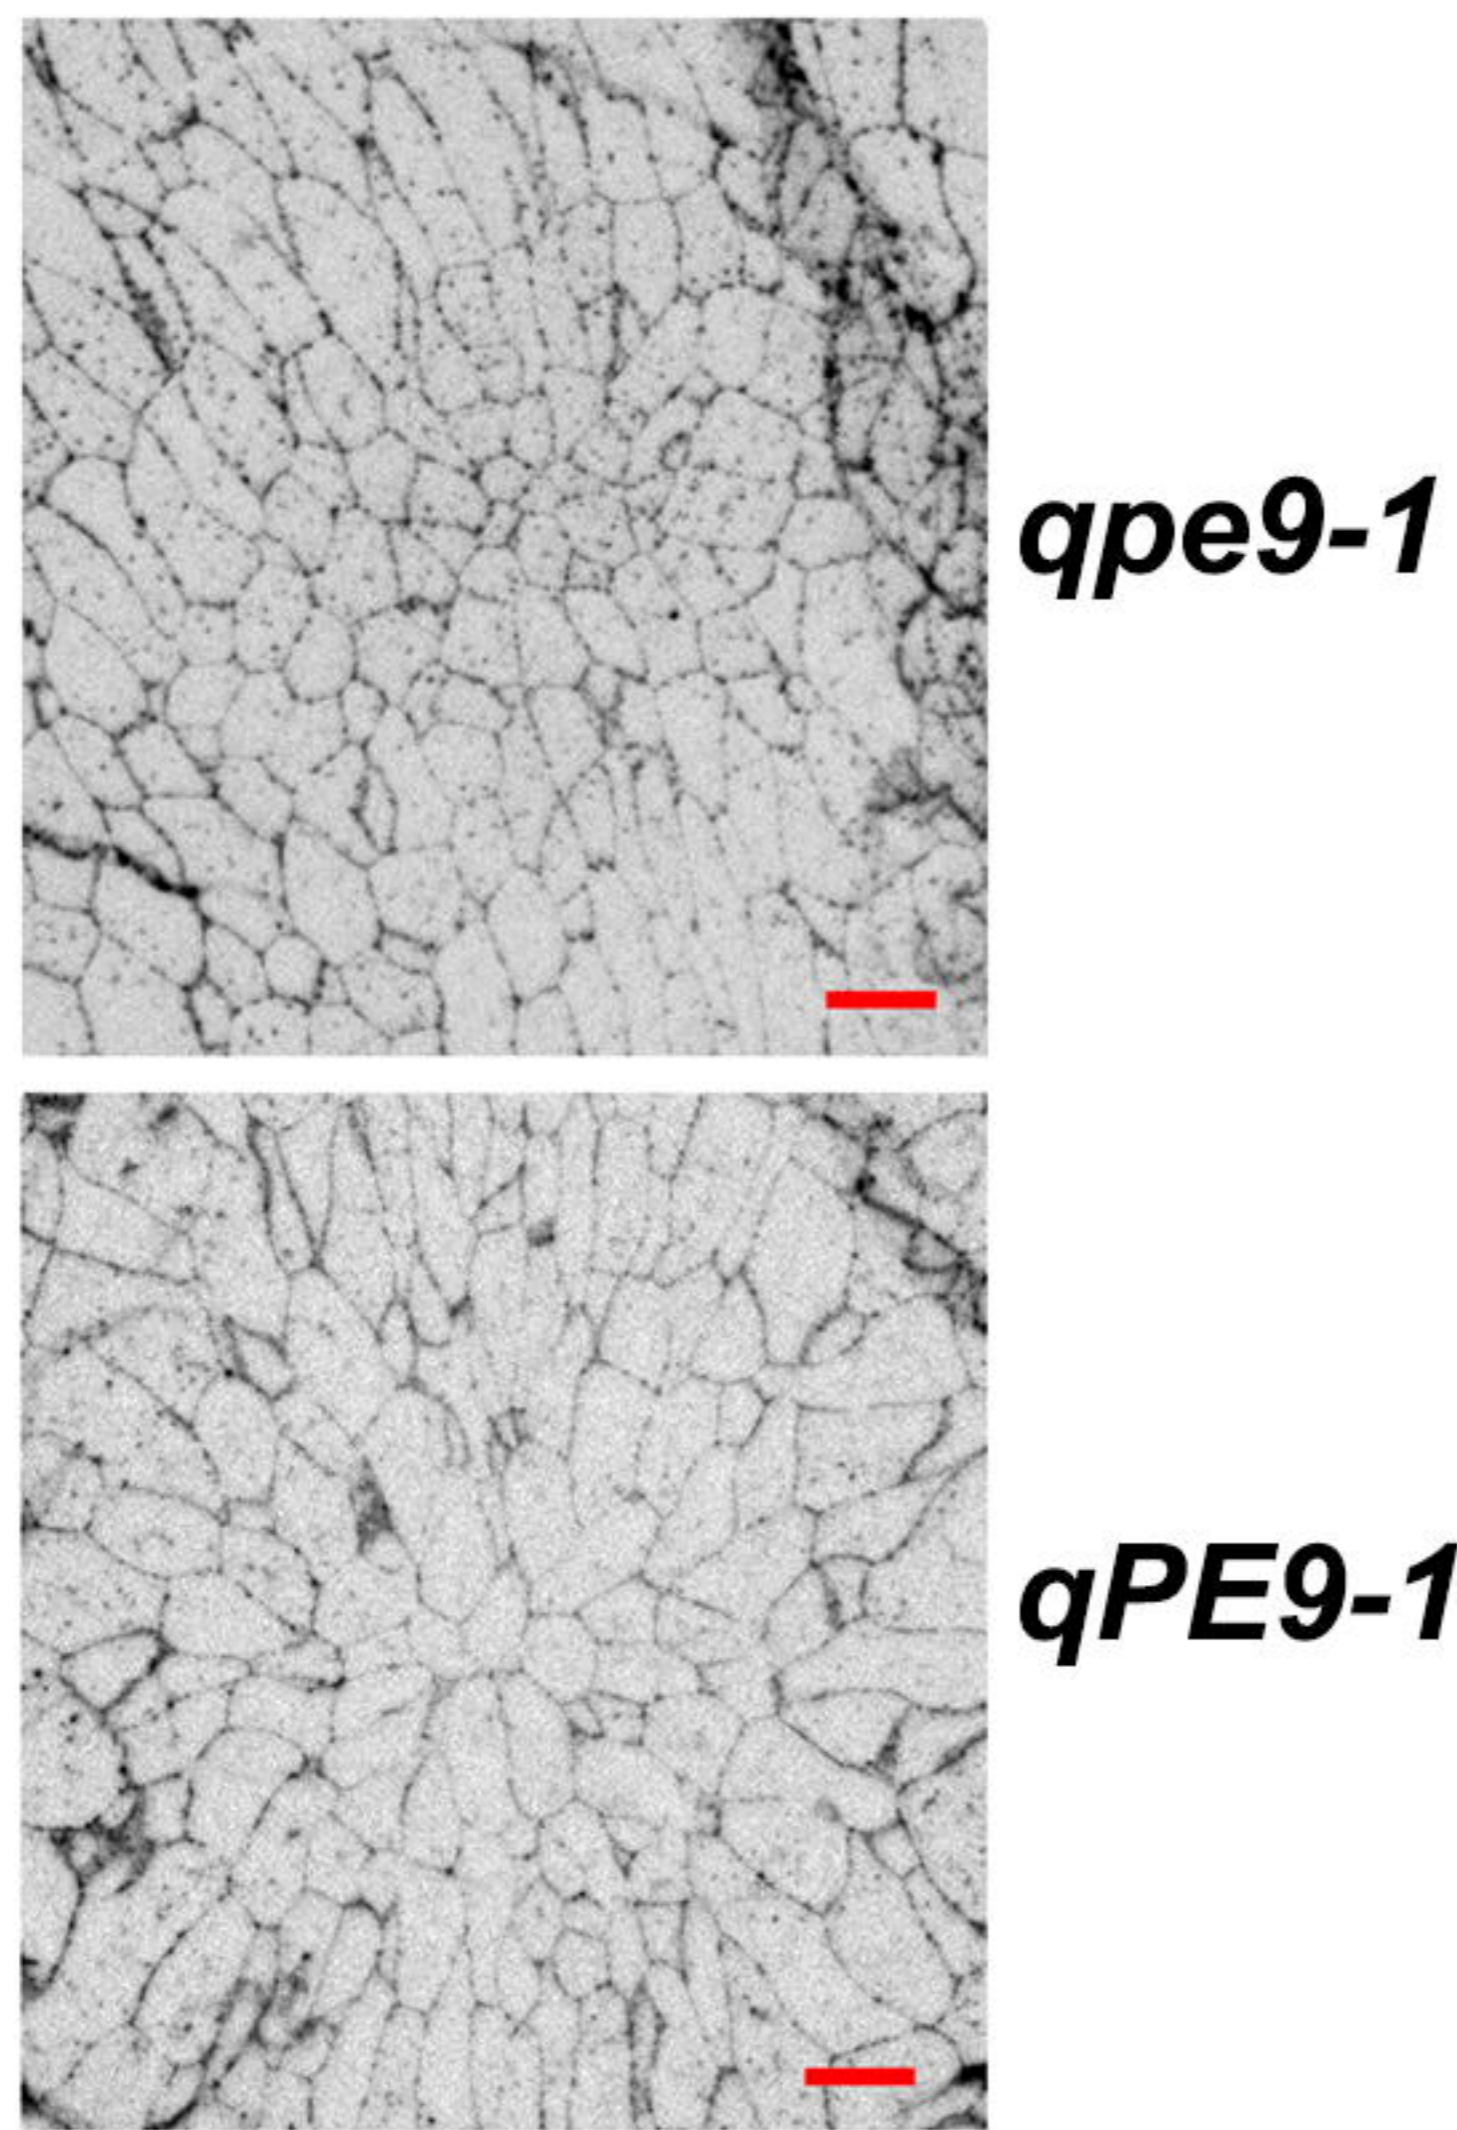**B**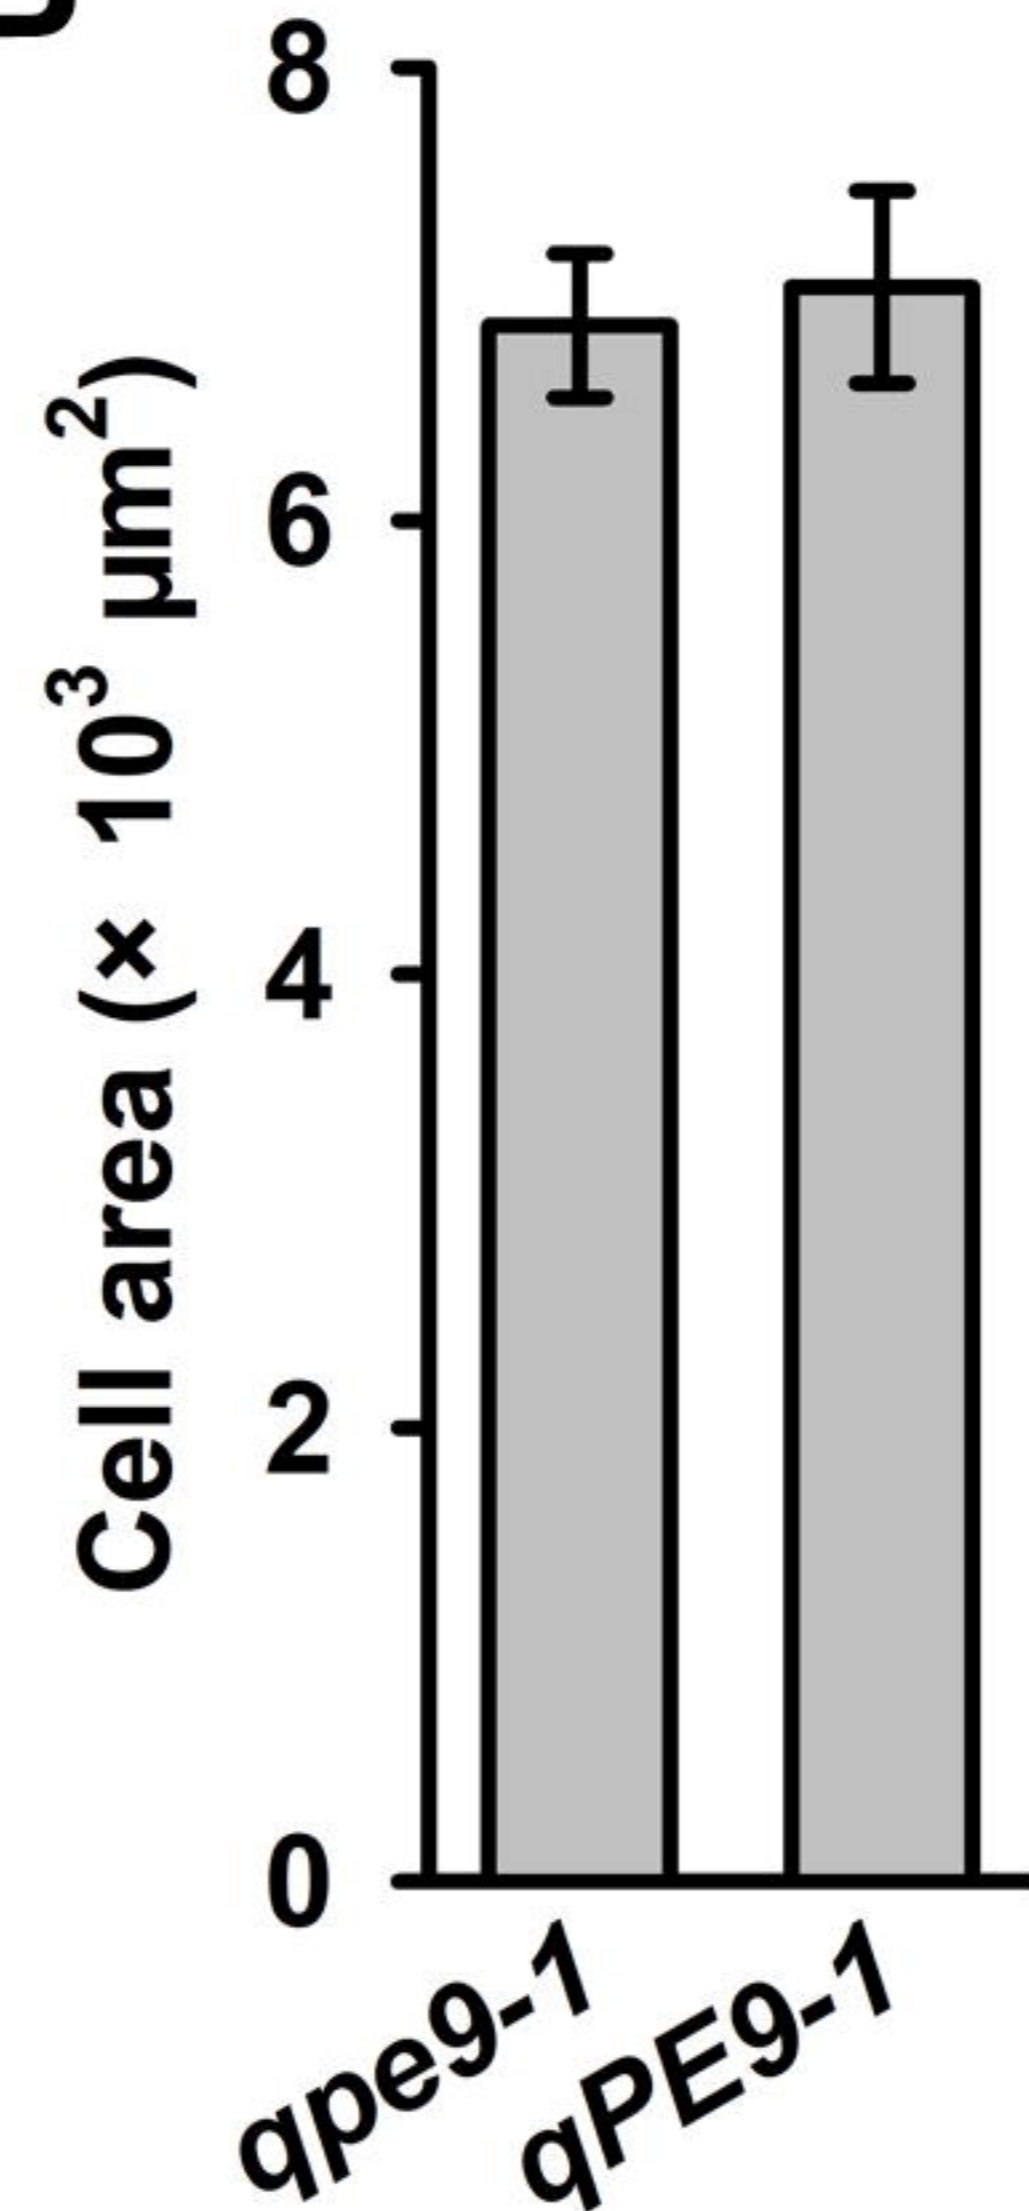**C**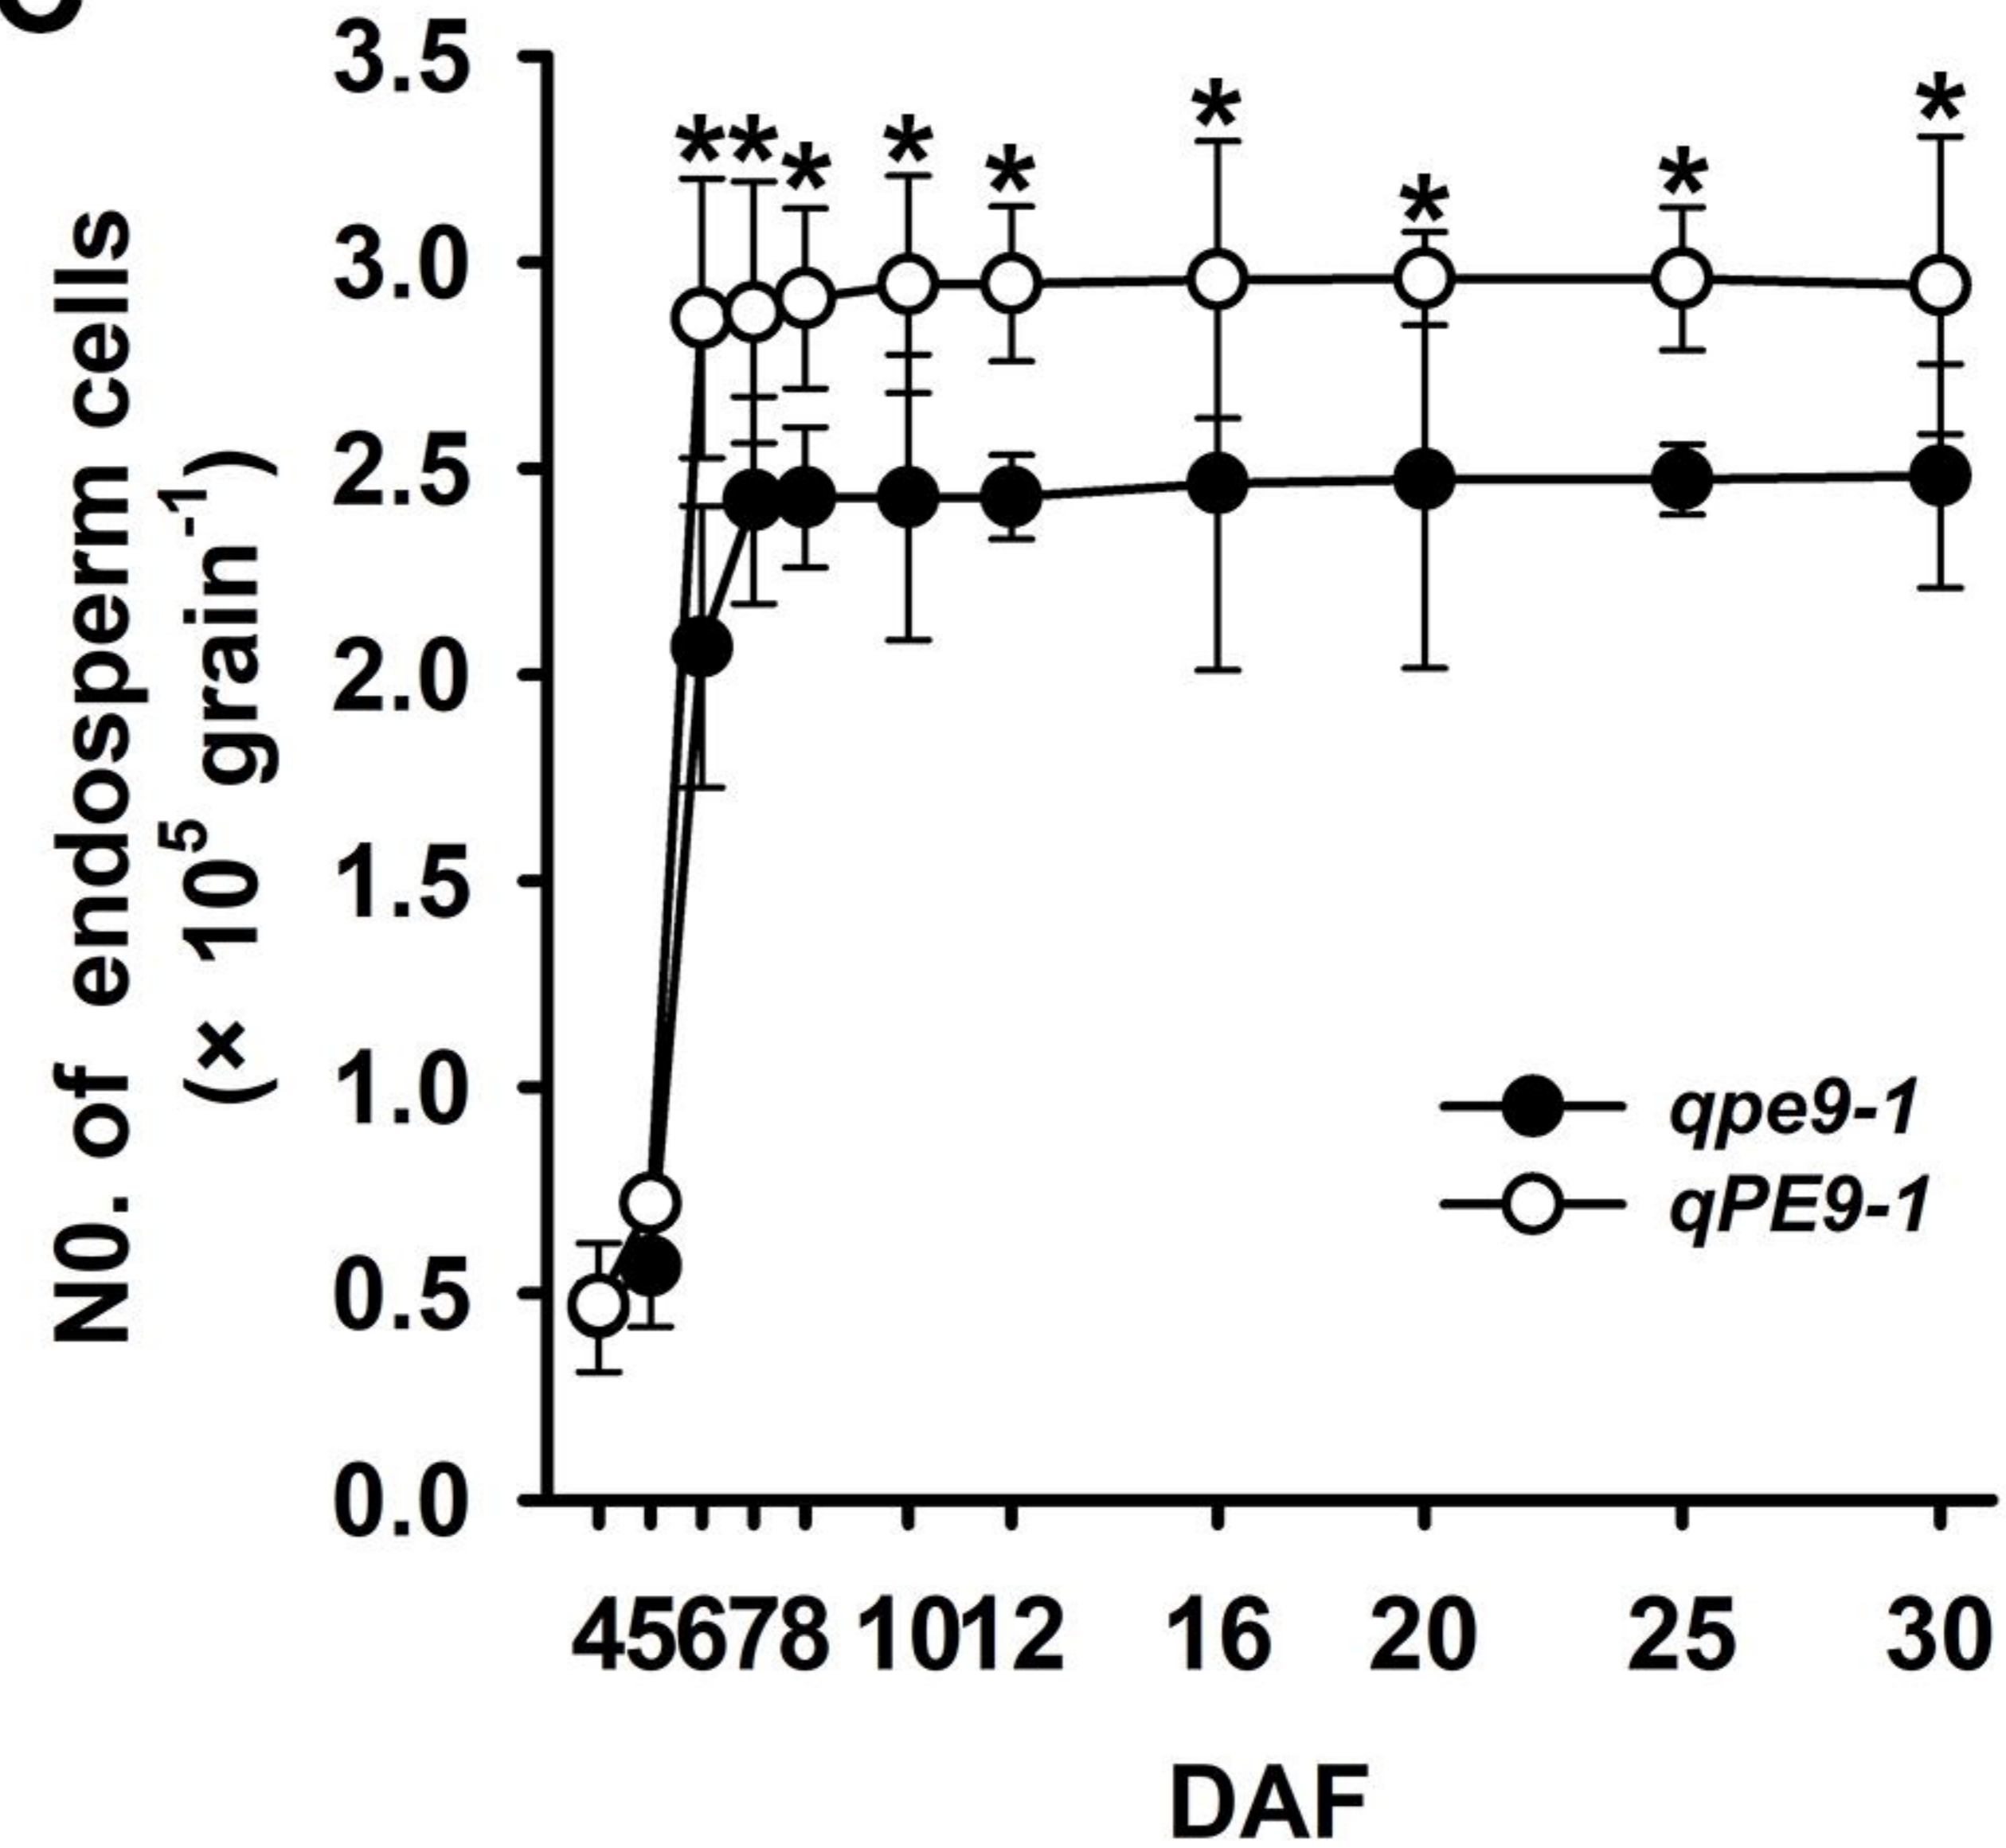**D**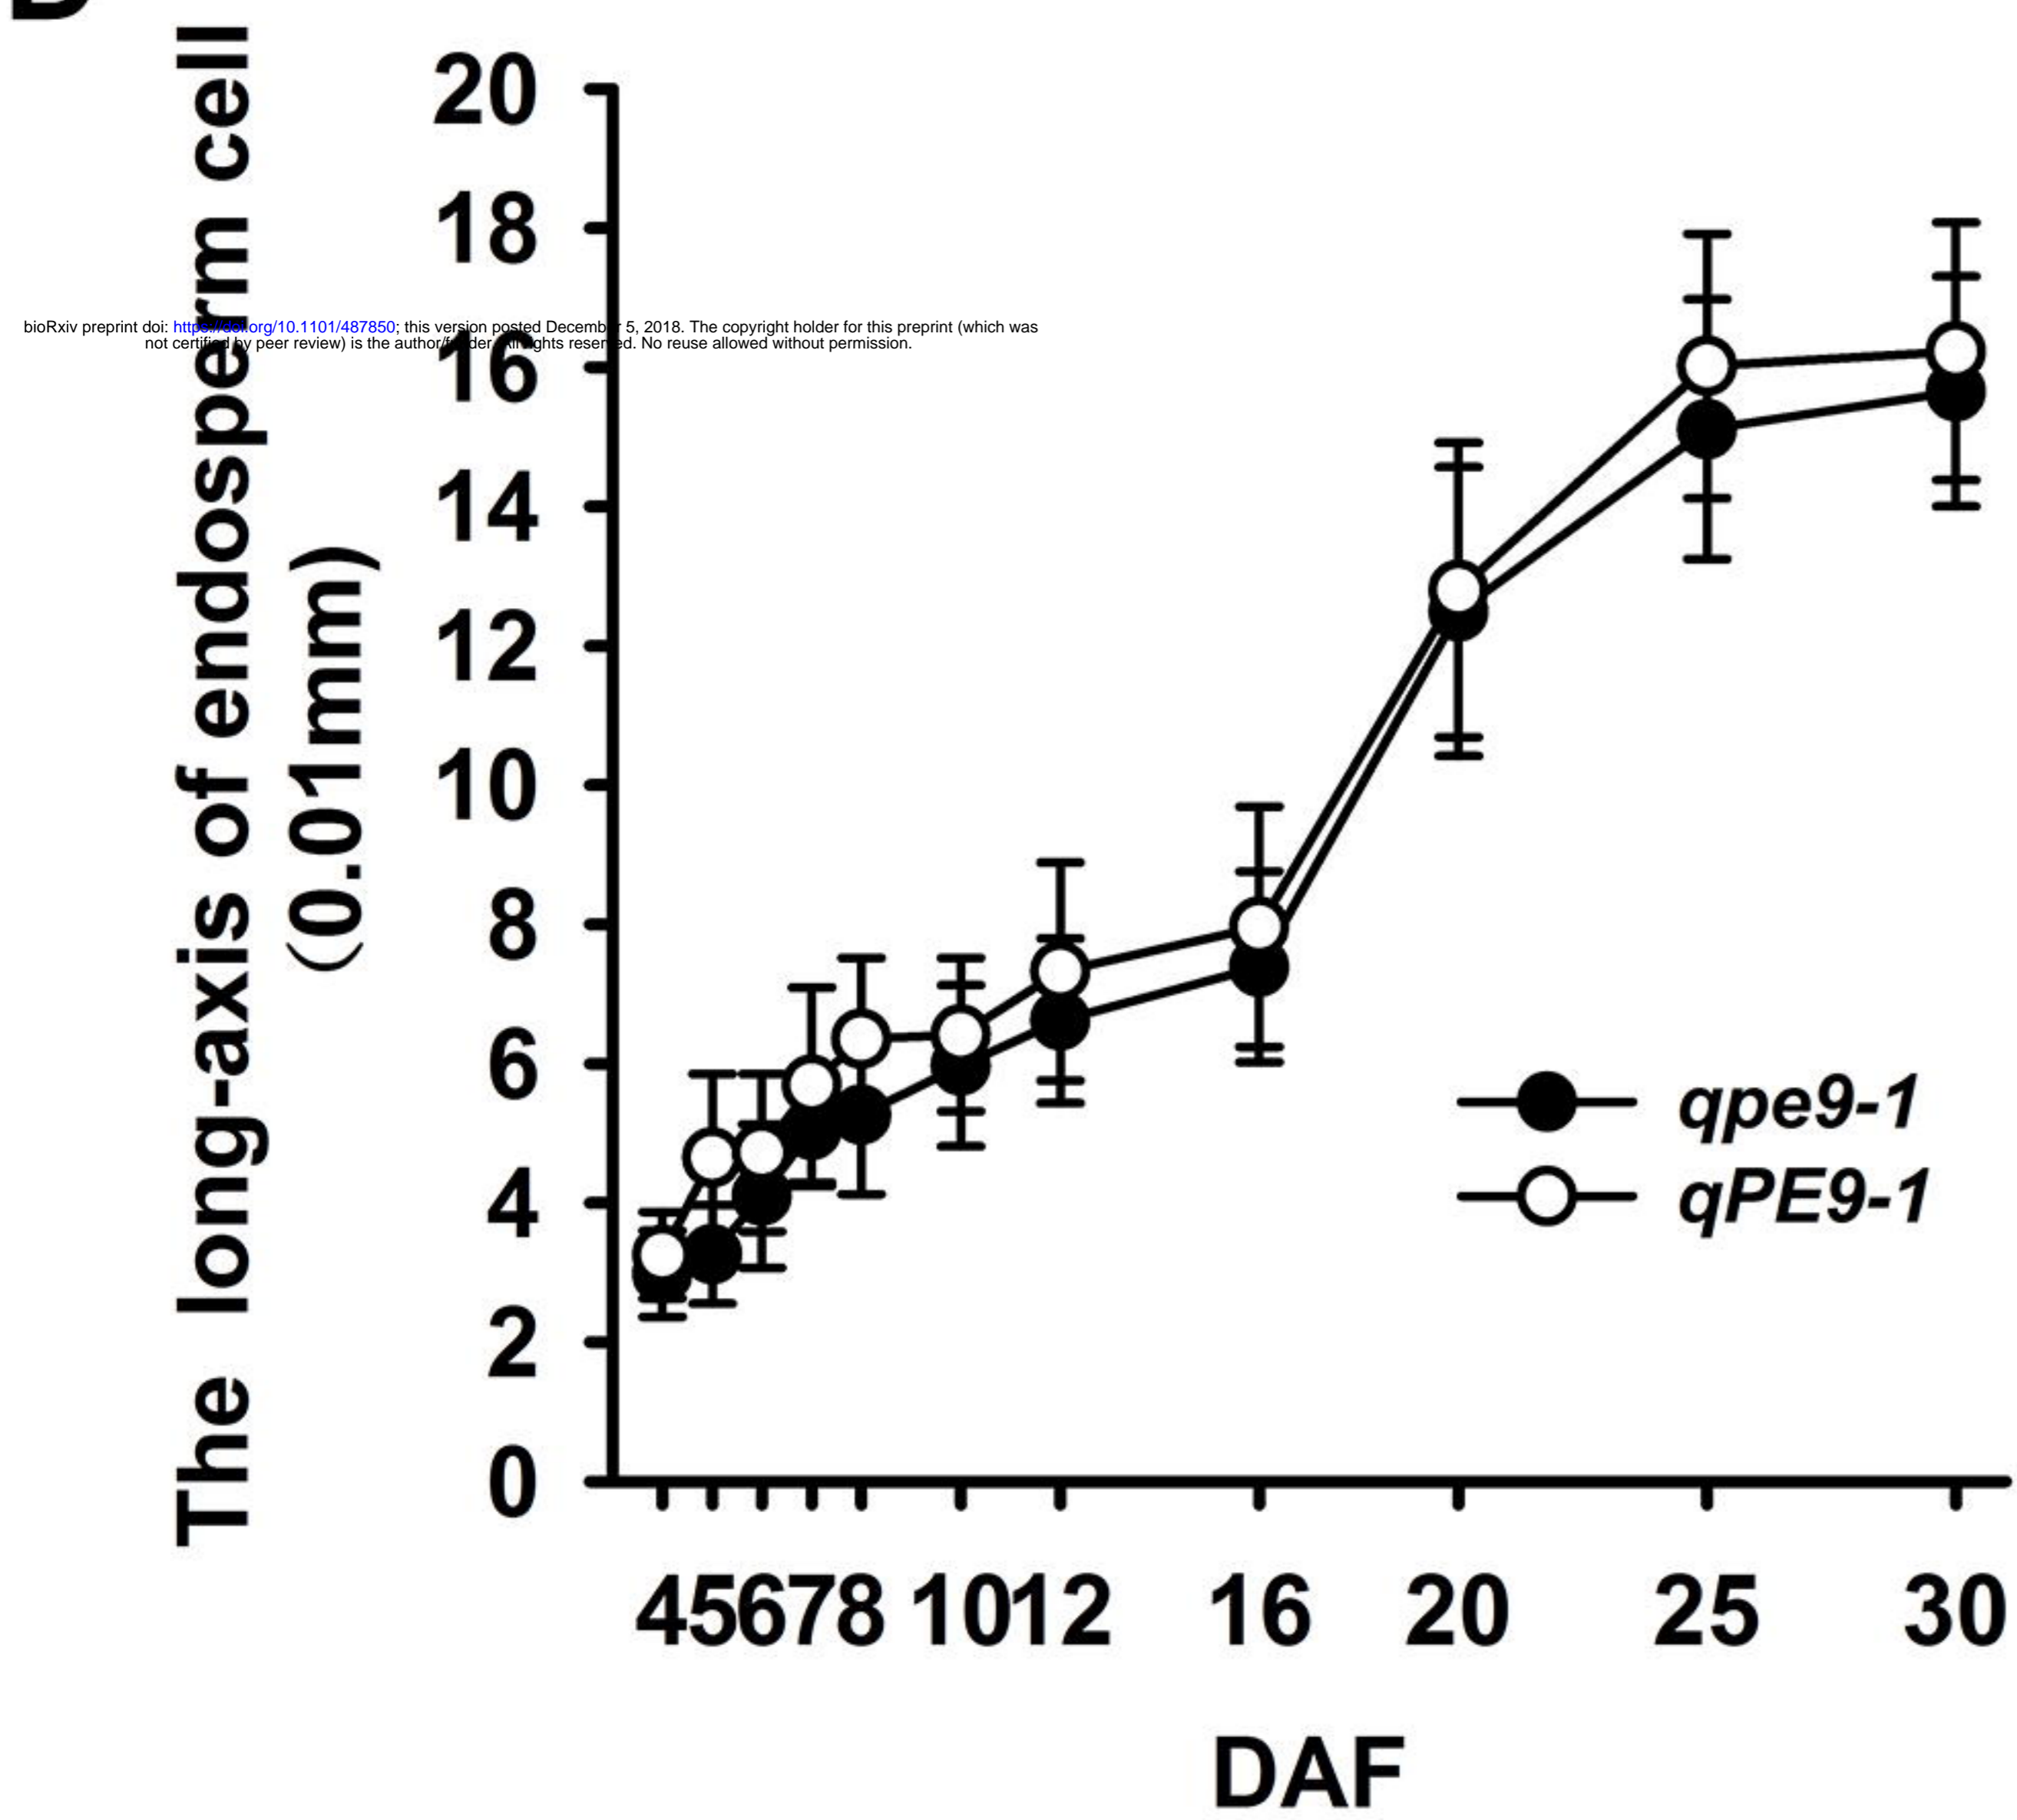

The short-axis of endosperm cell (0.01mm)

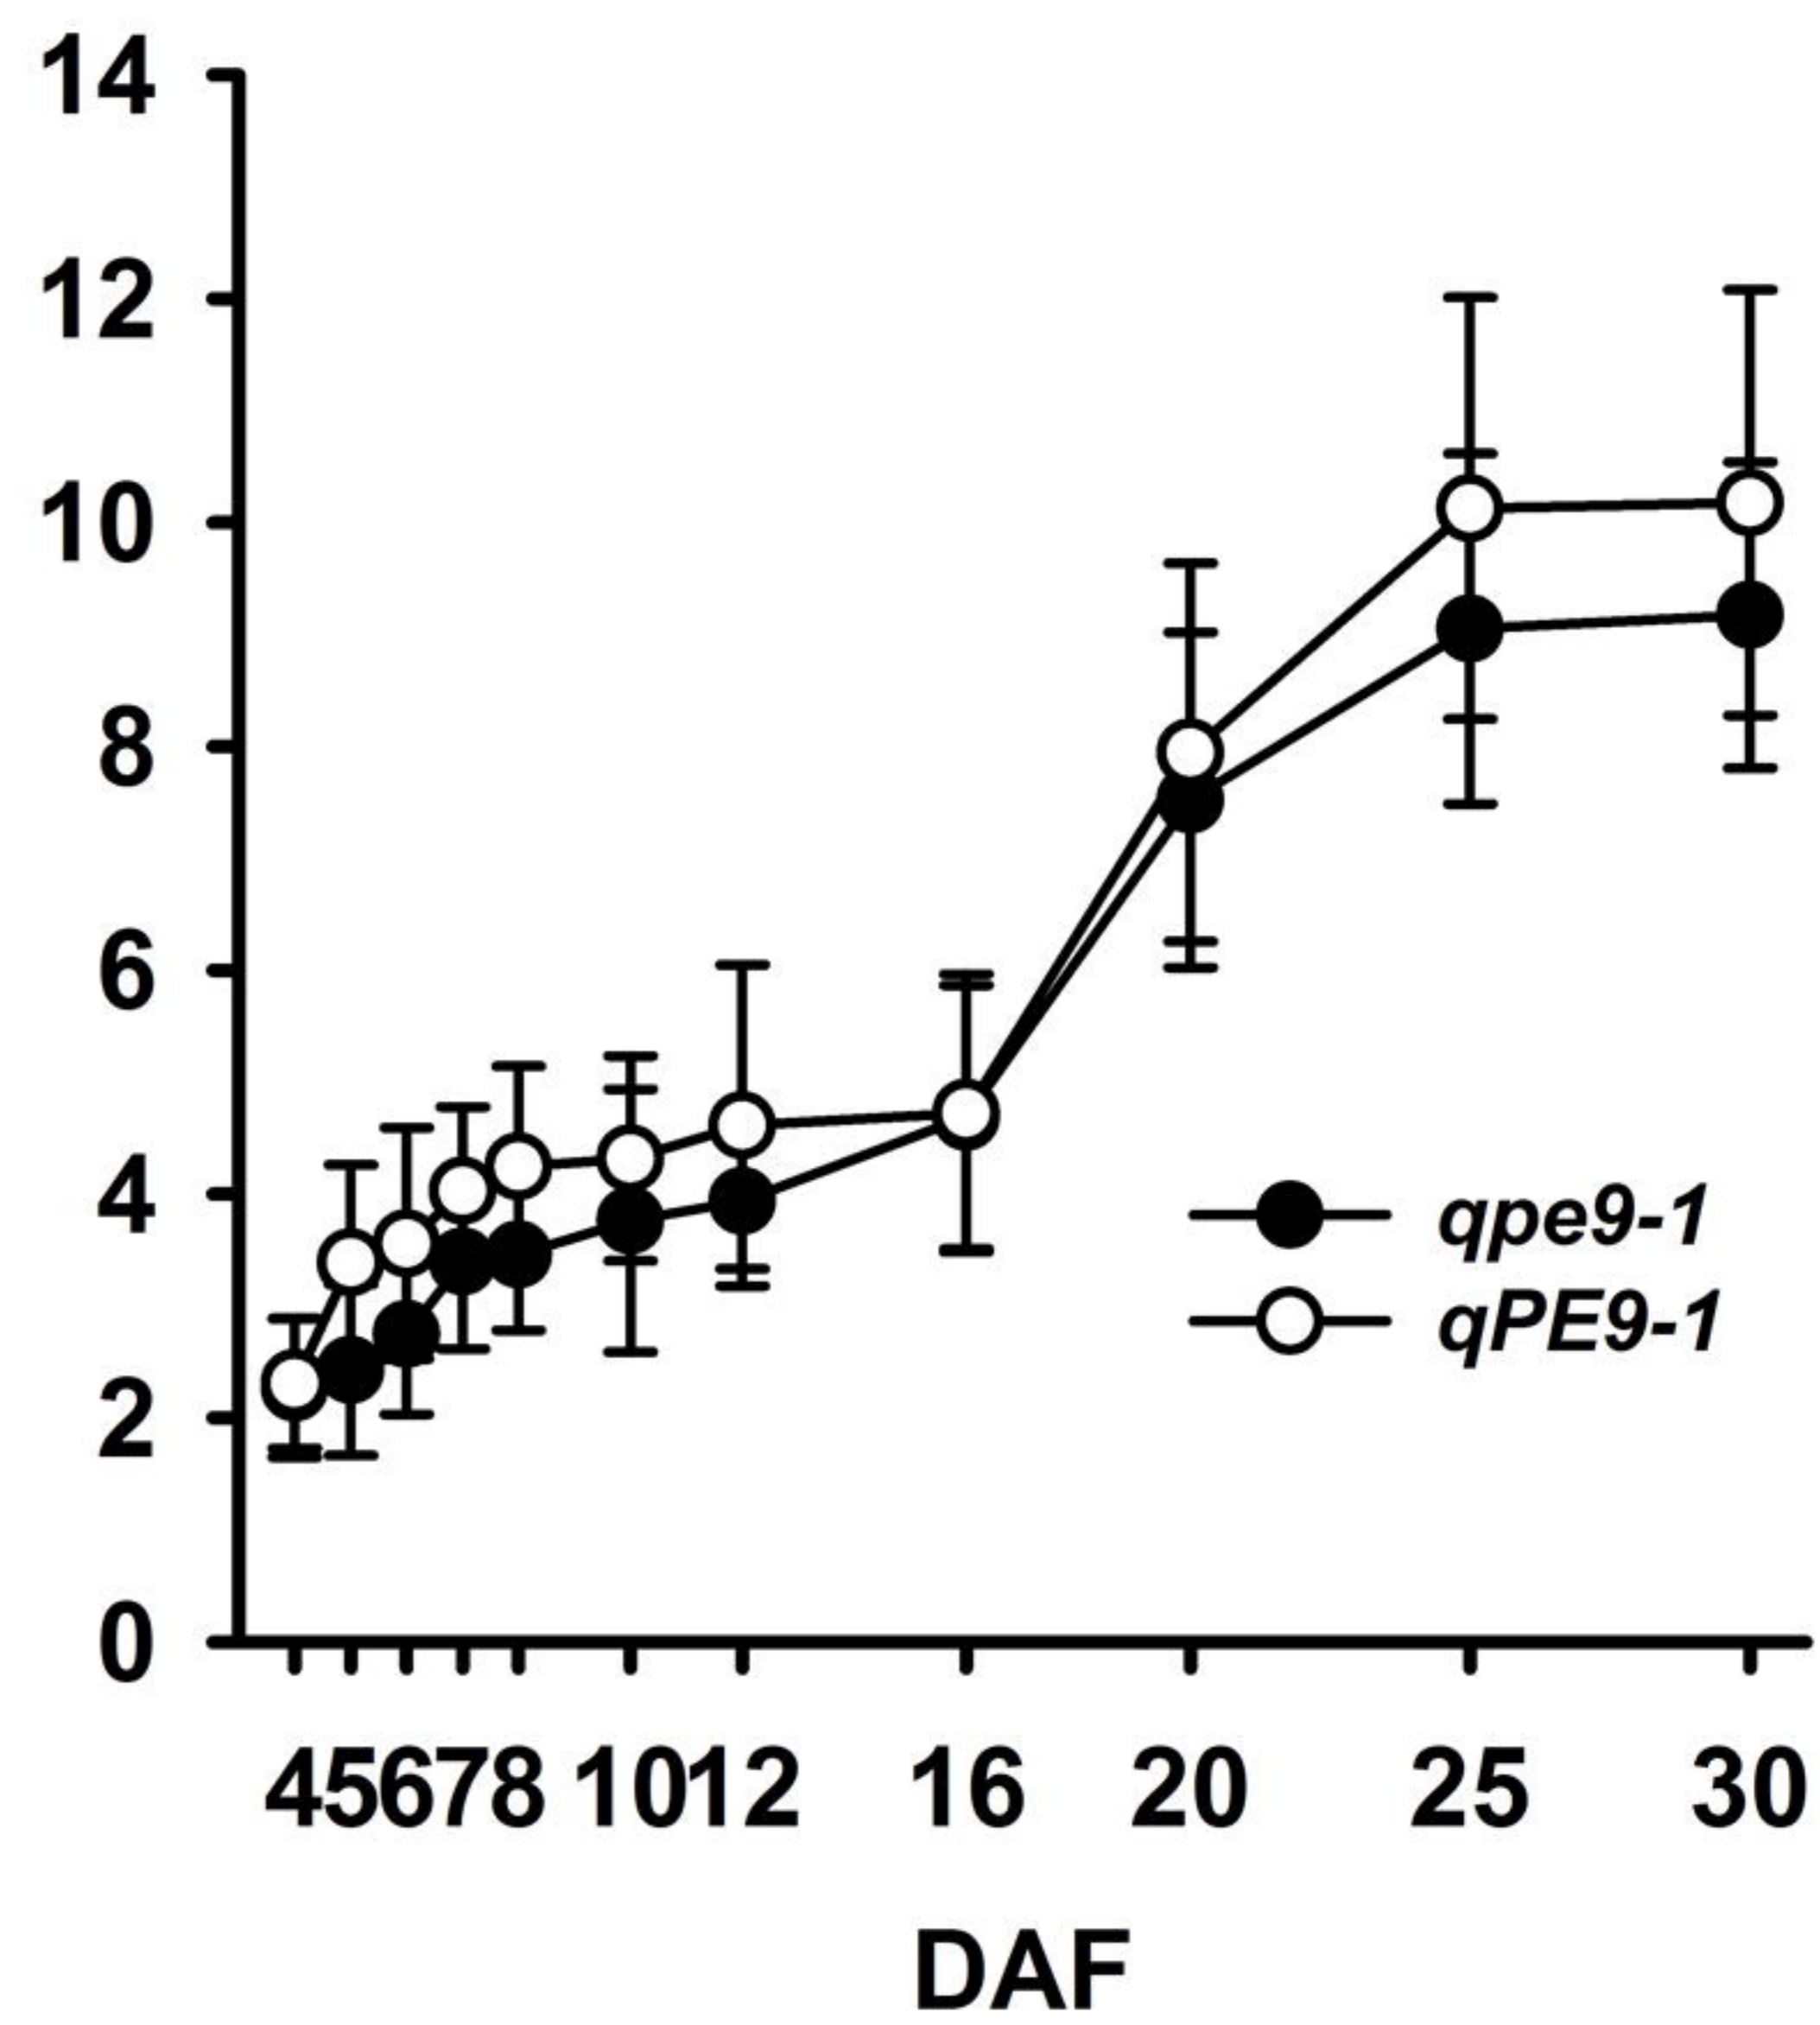



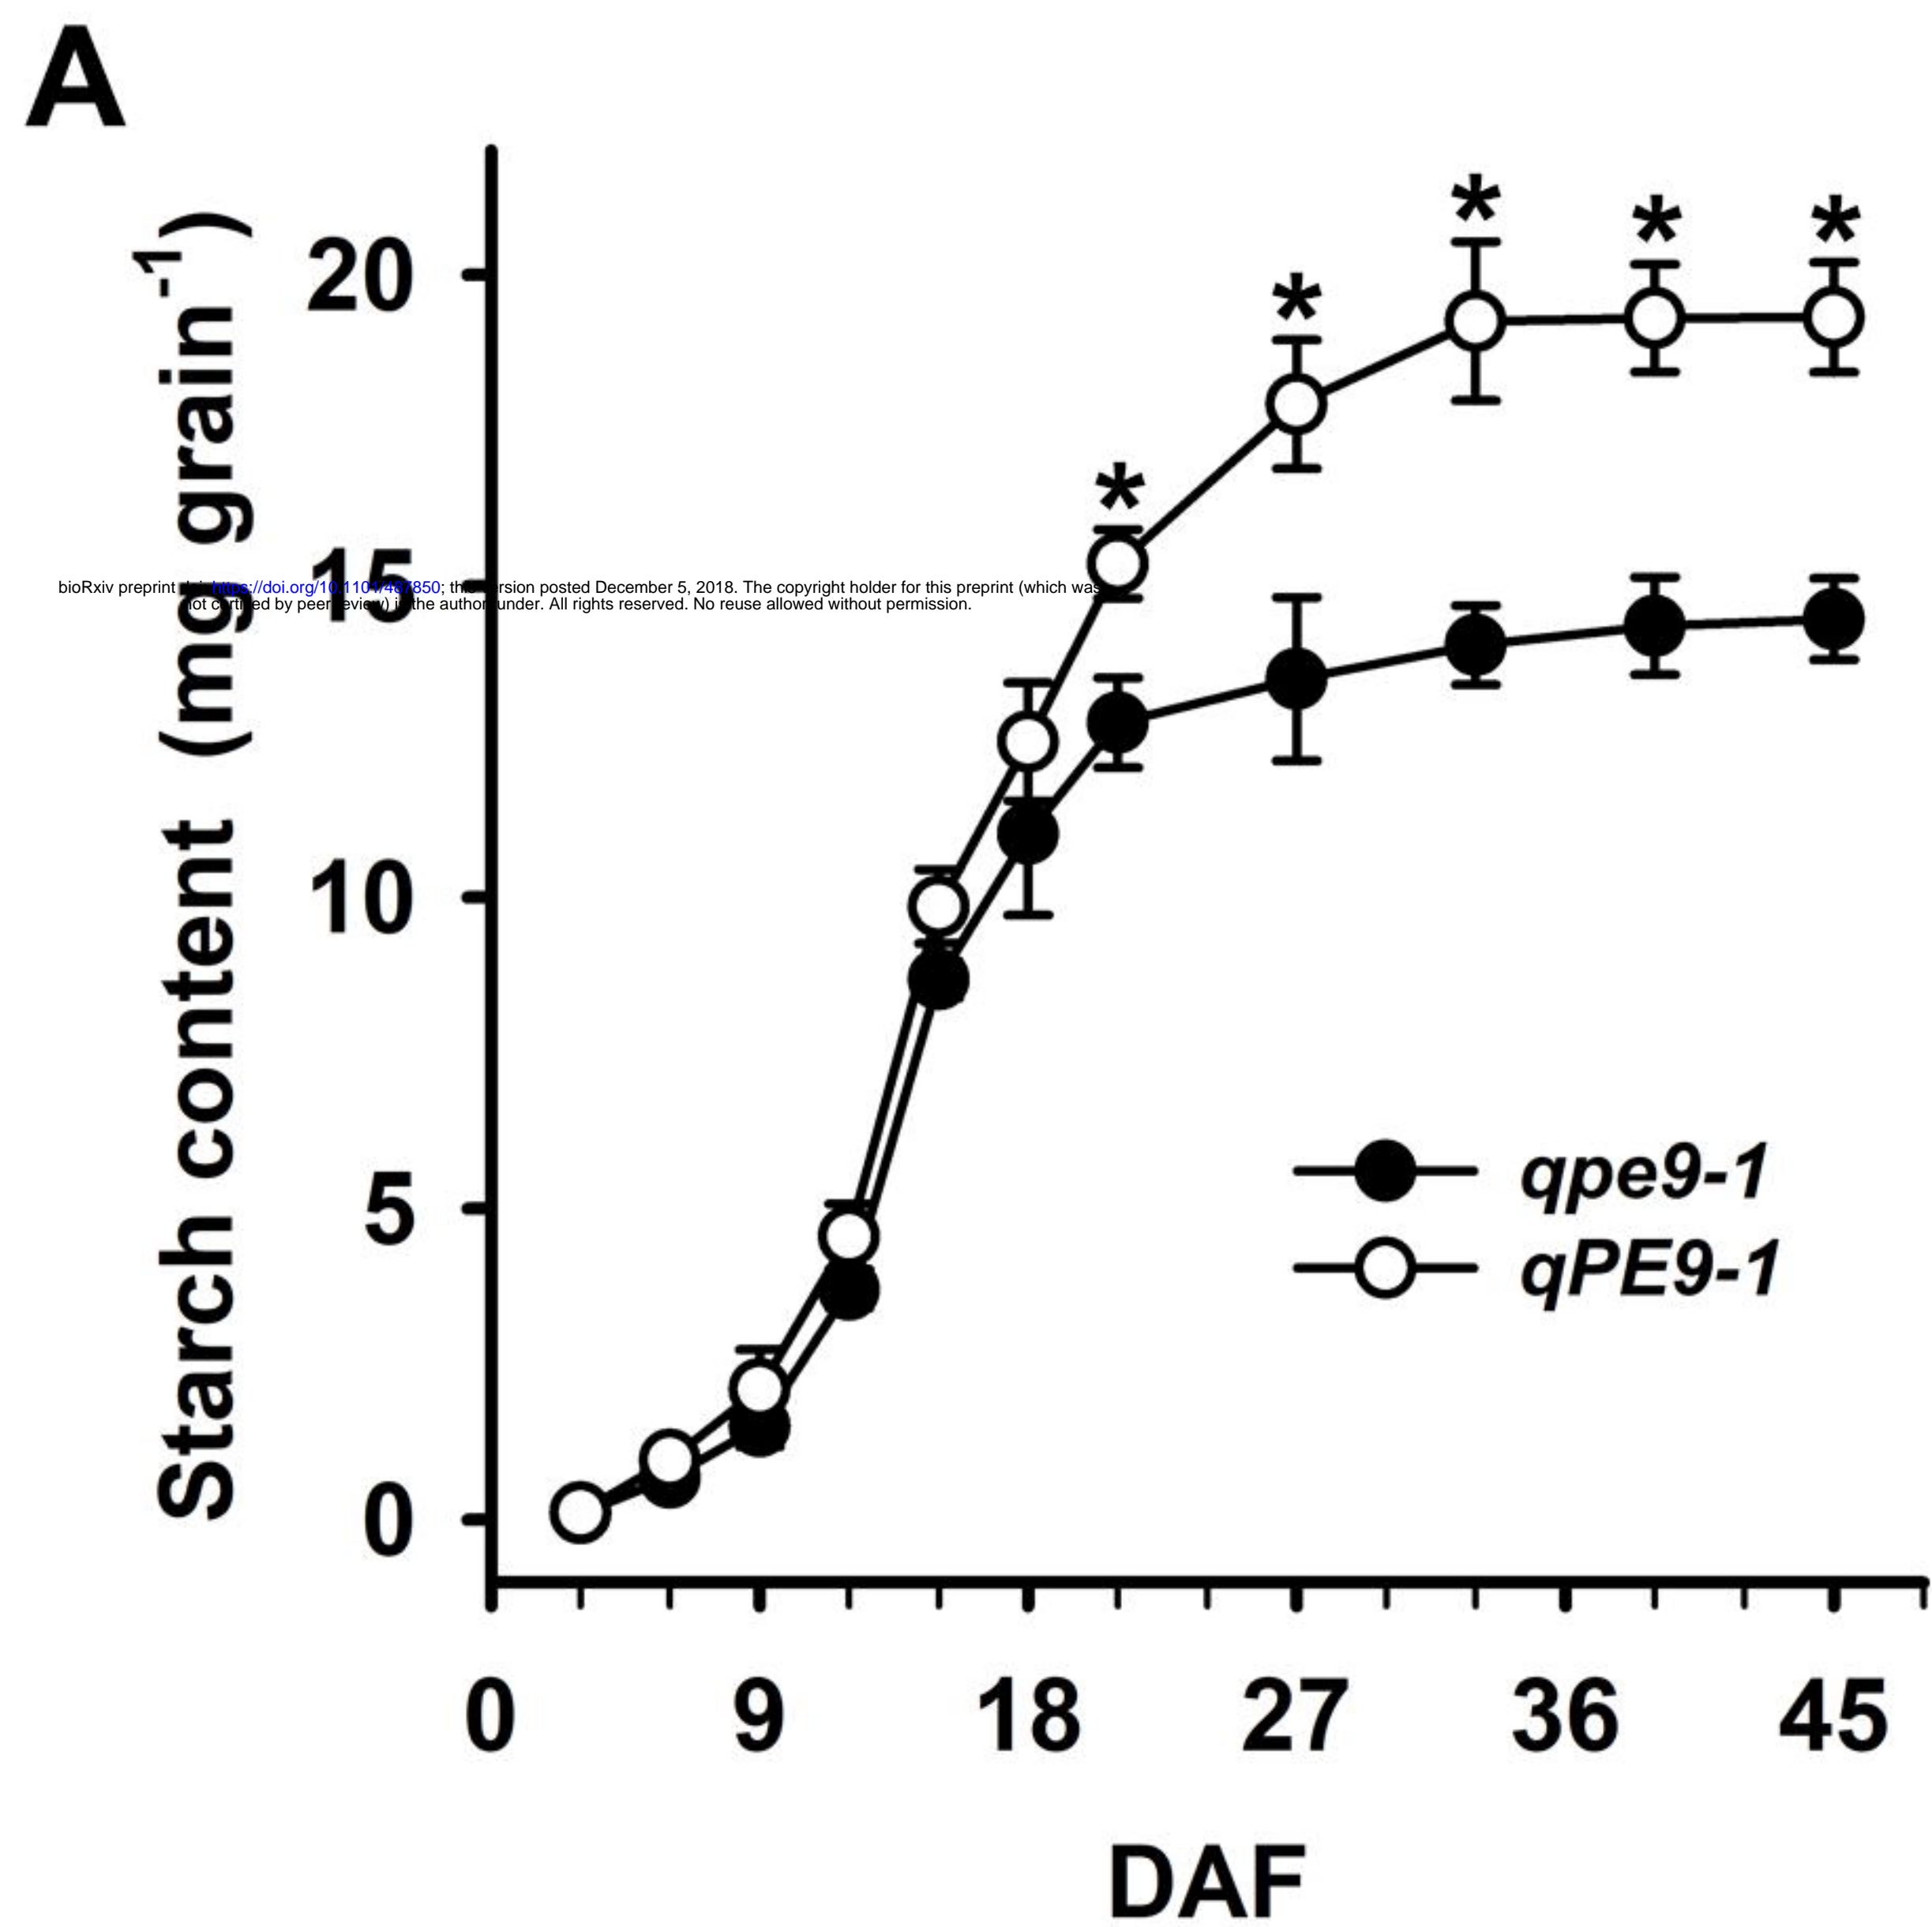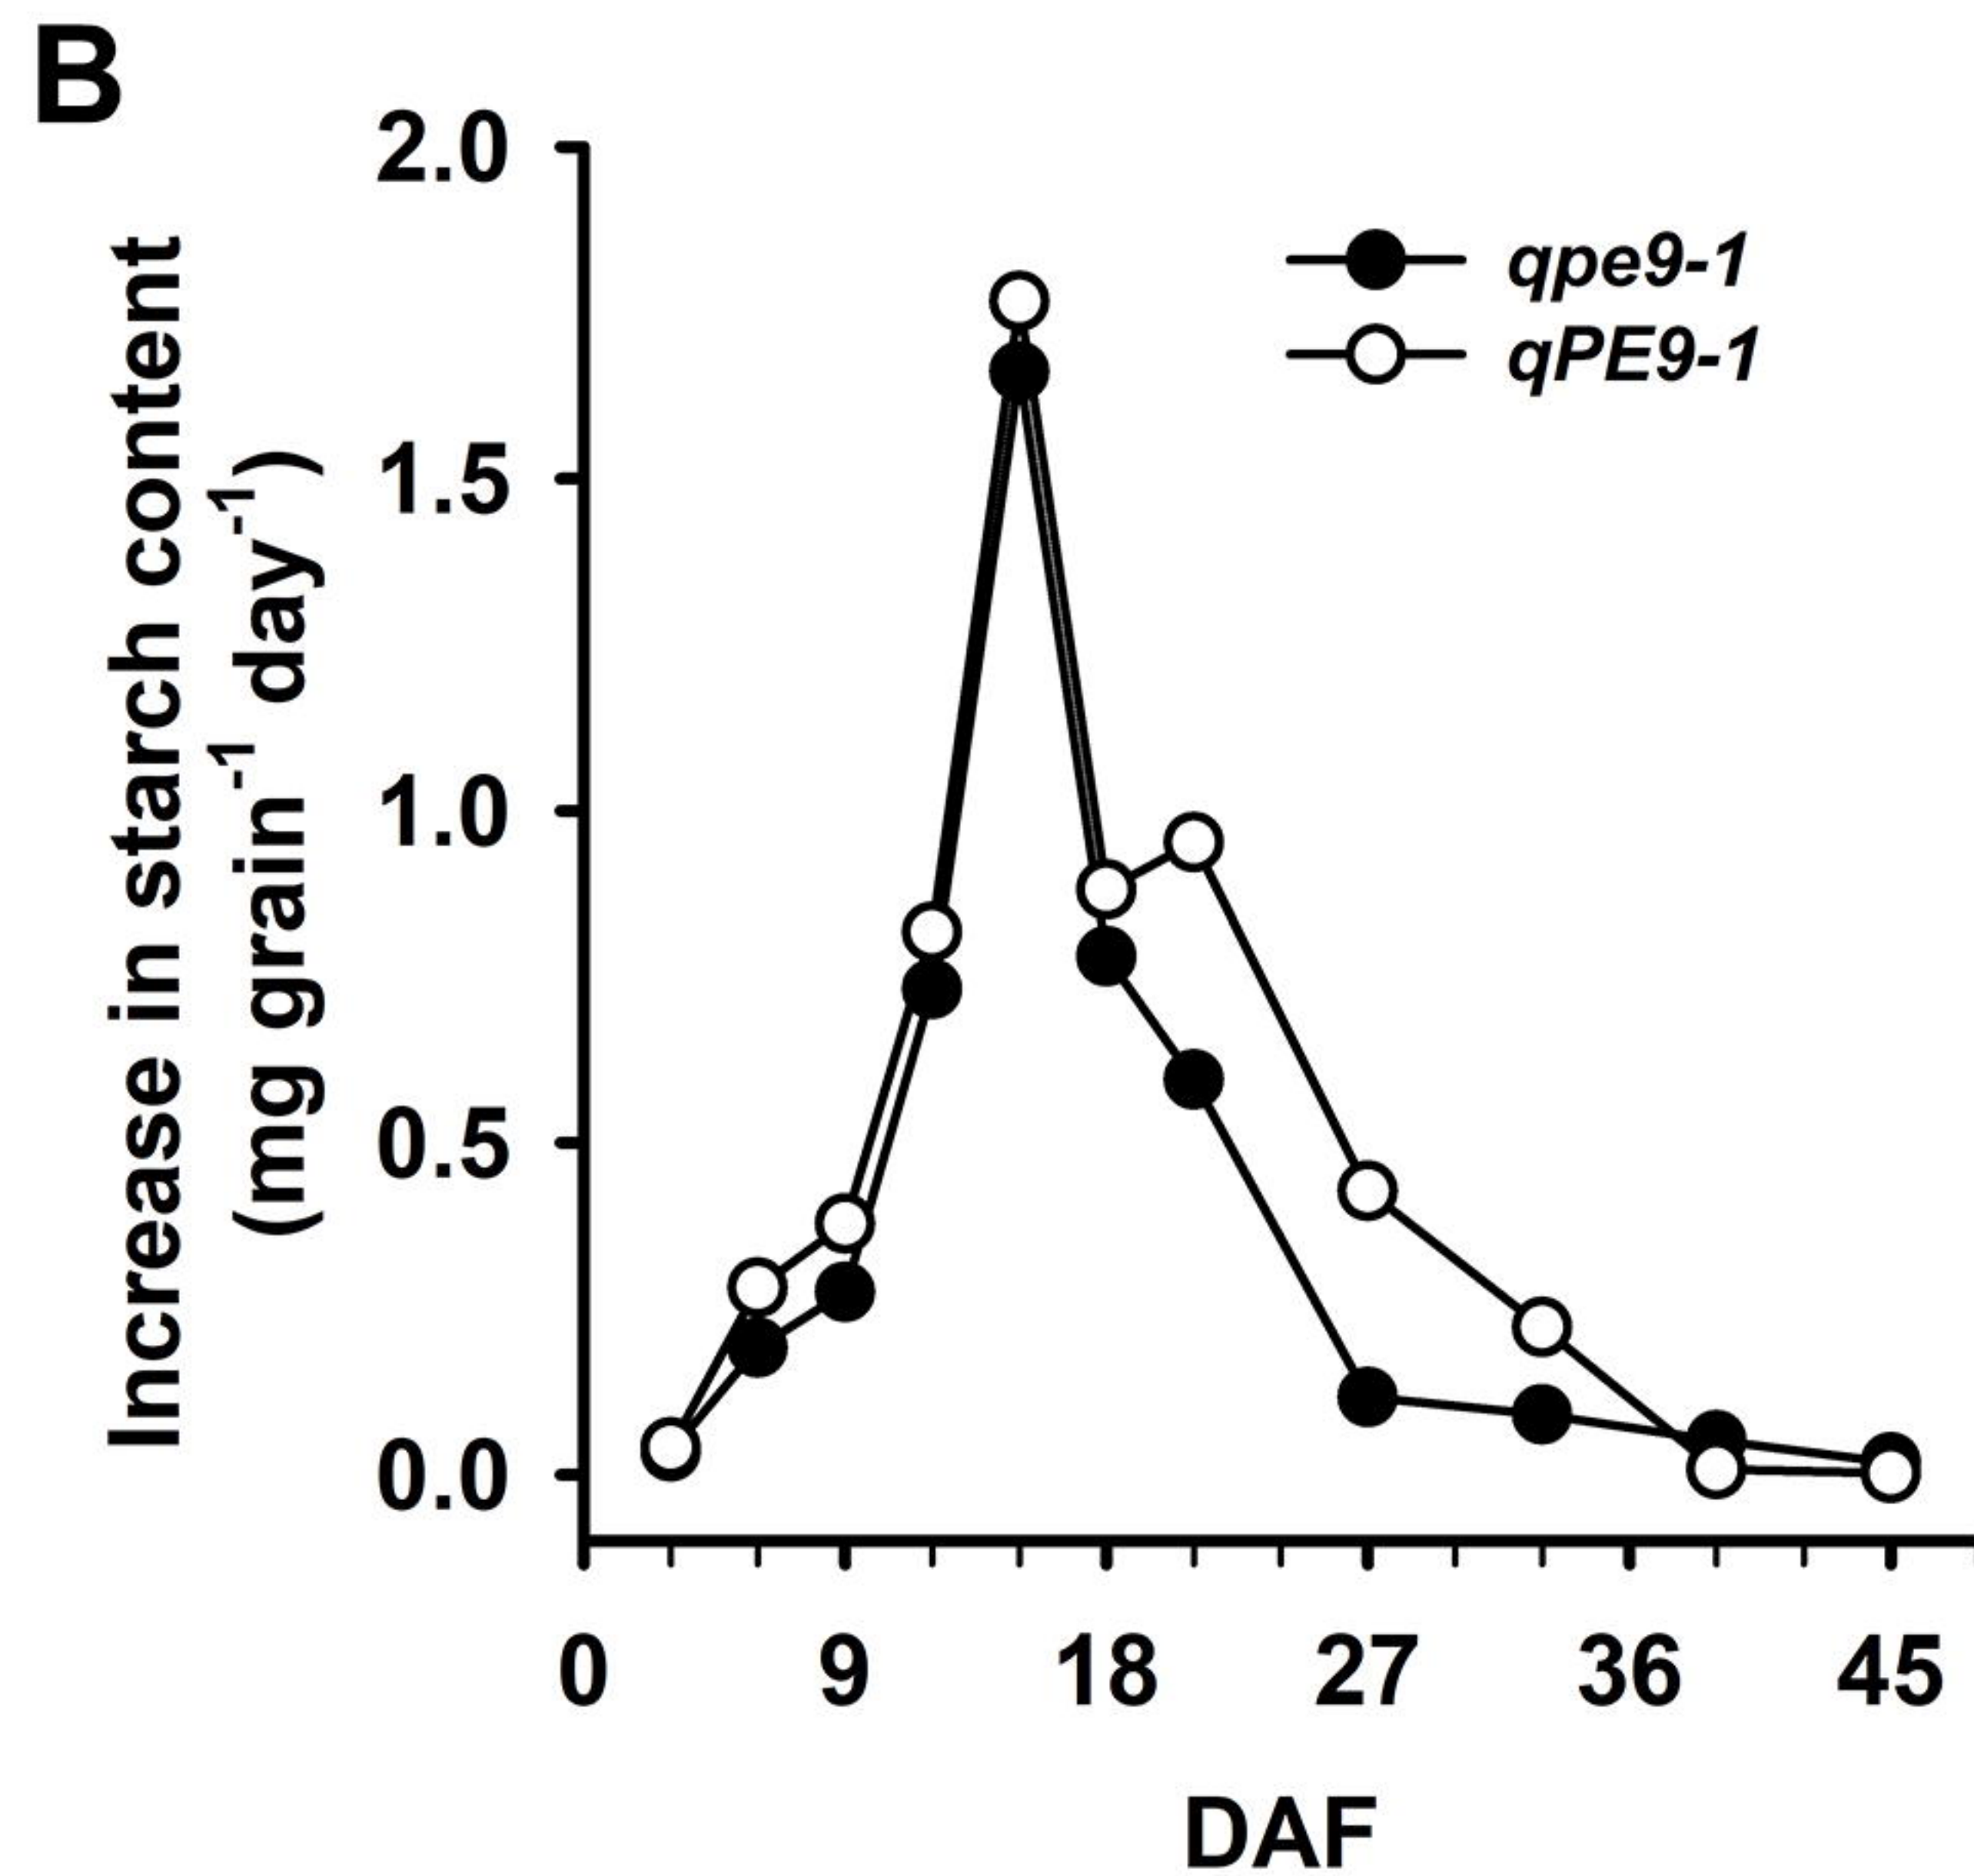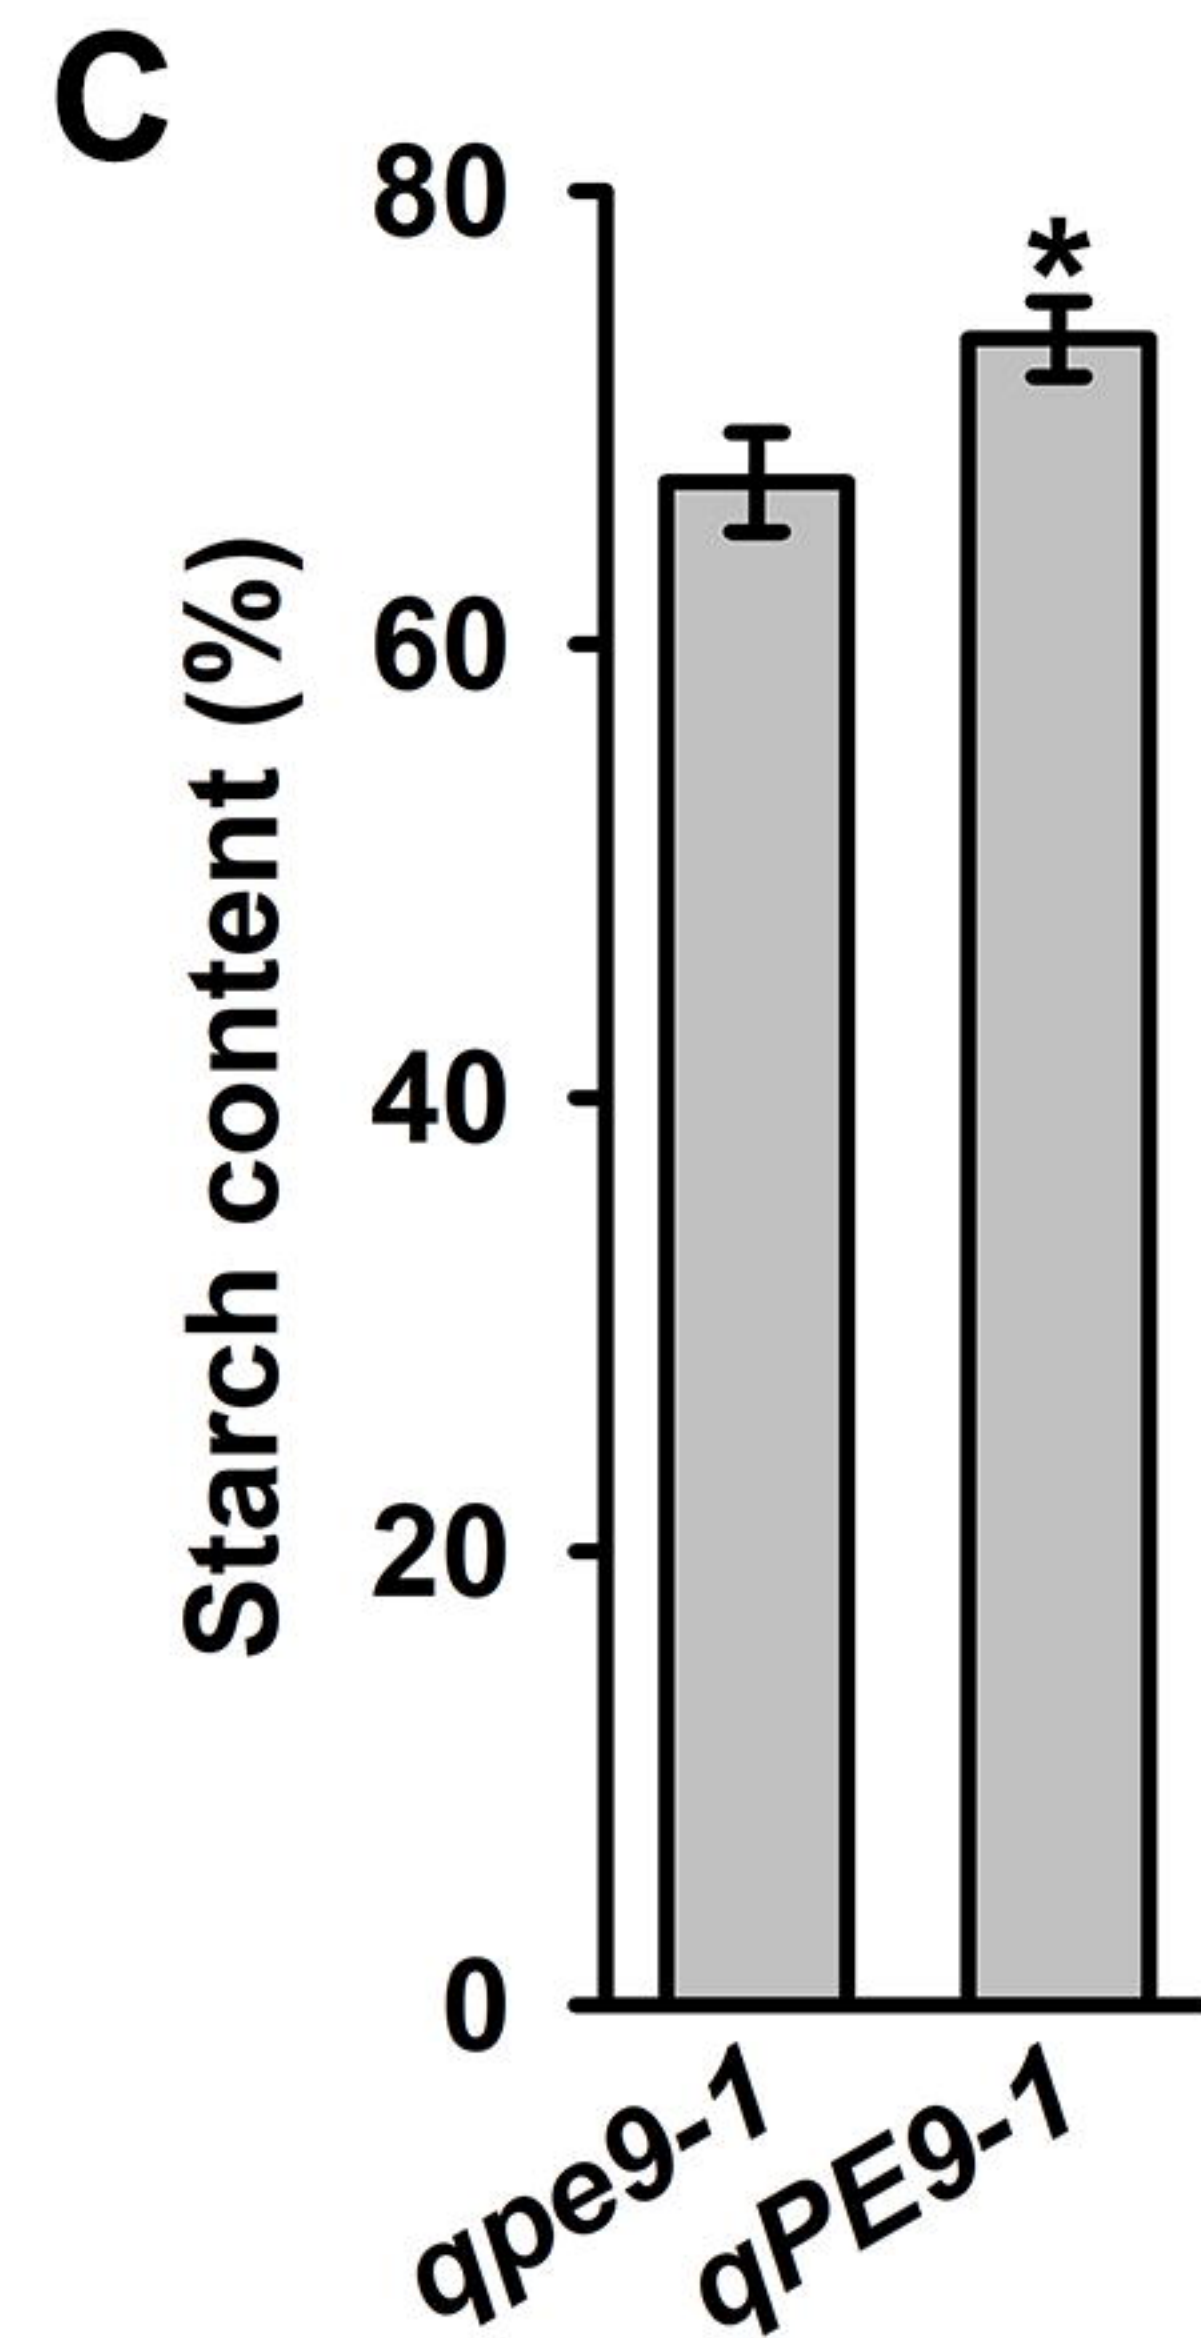

**A**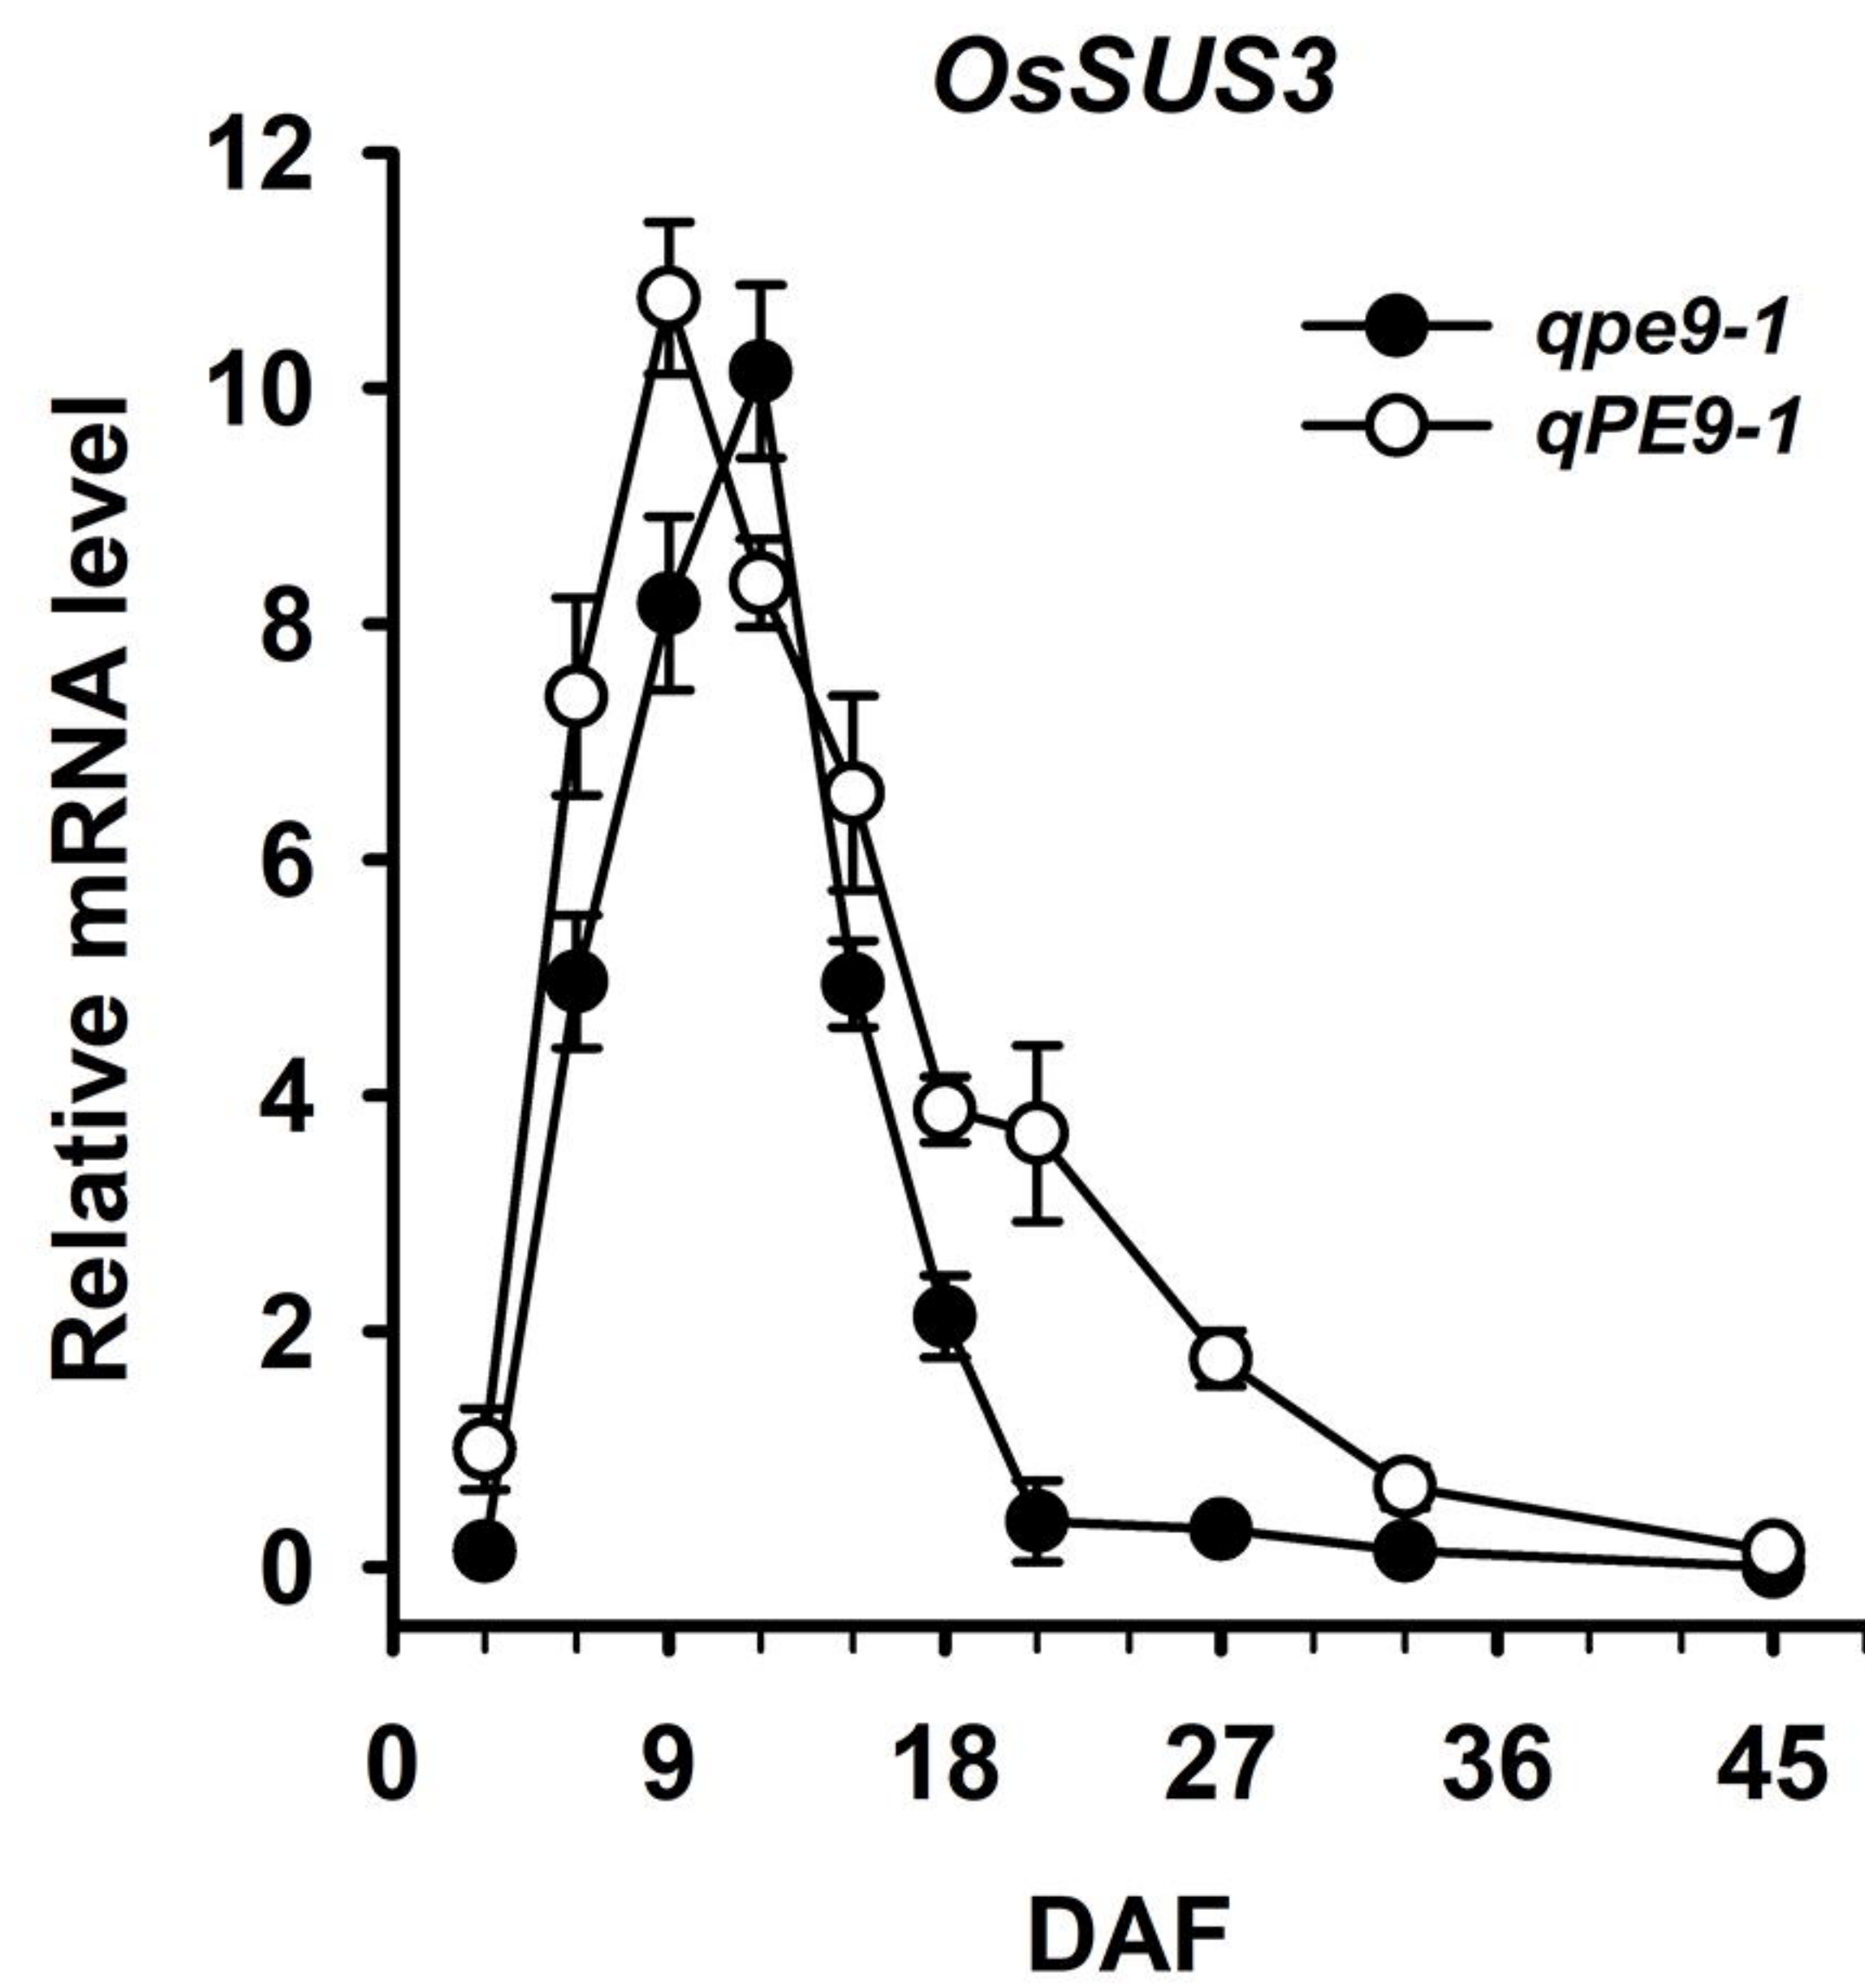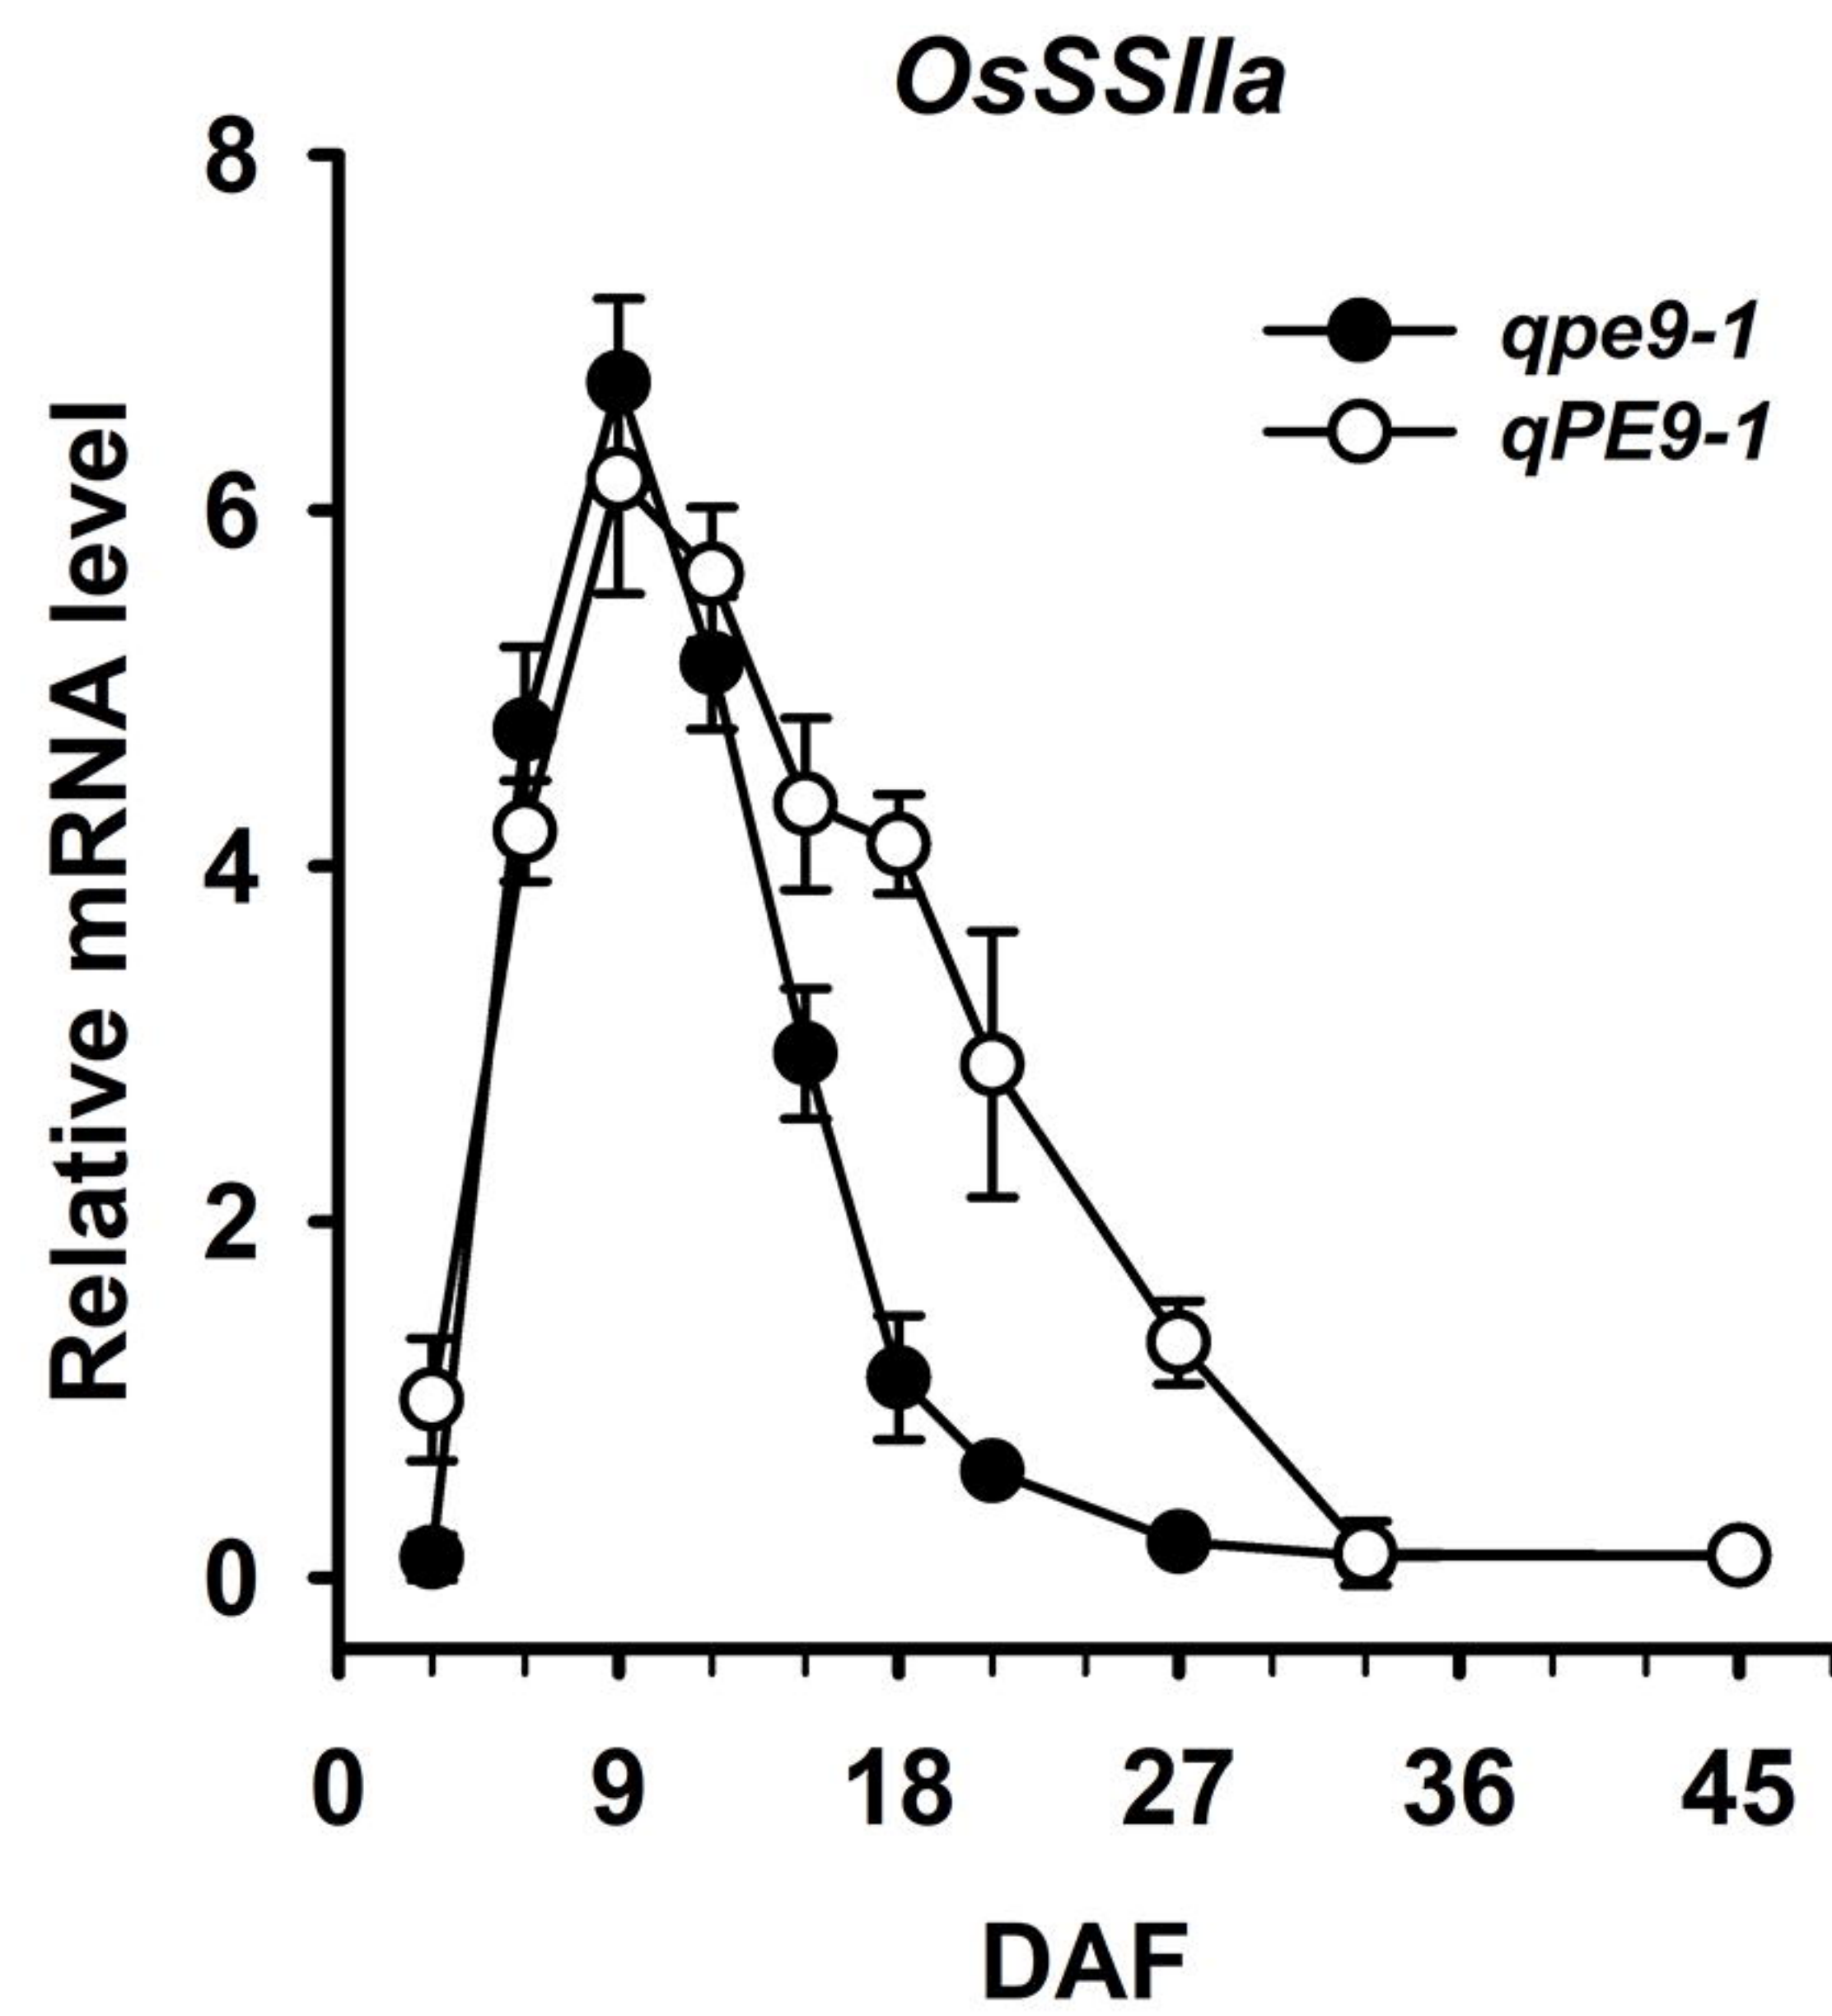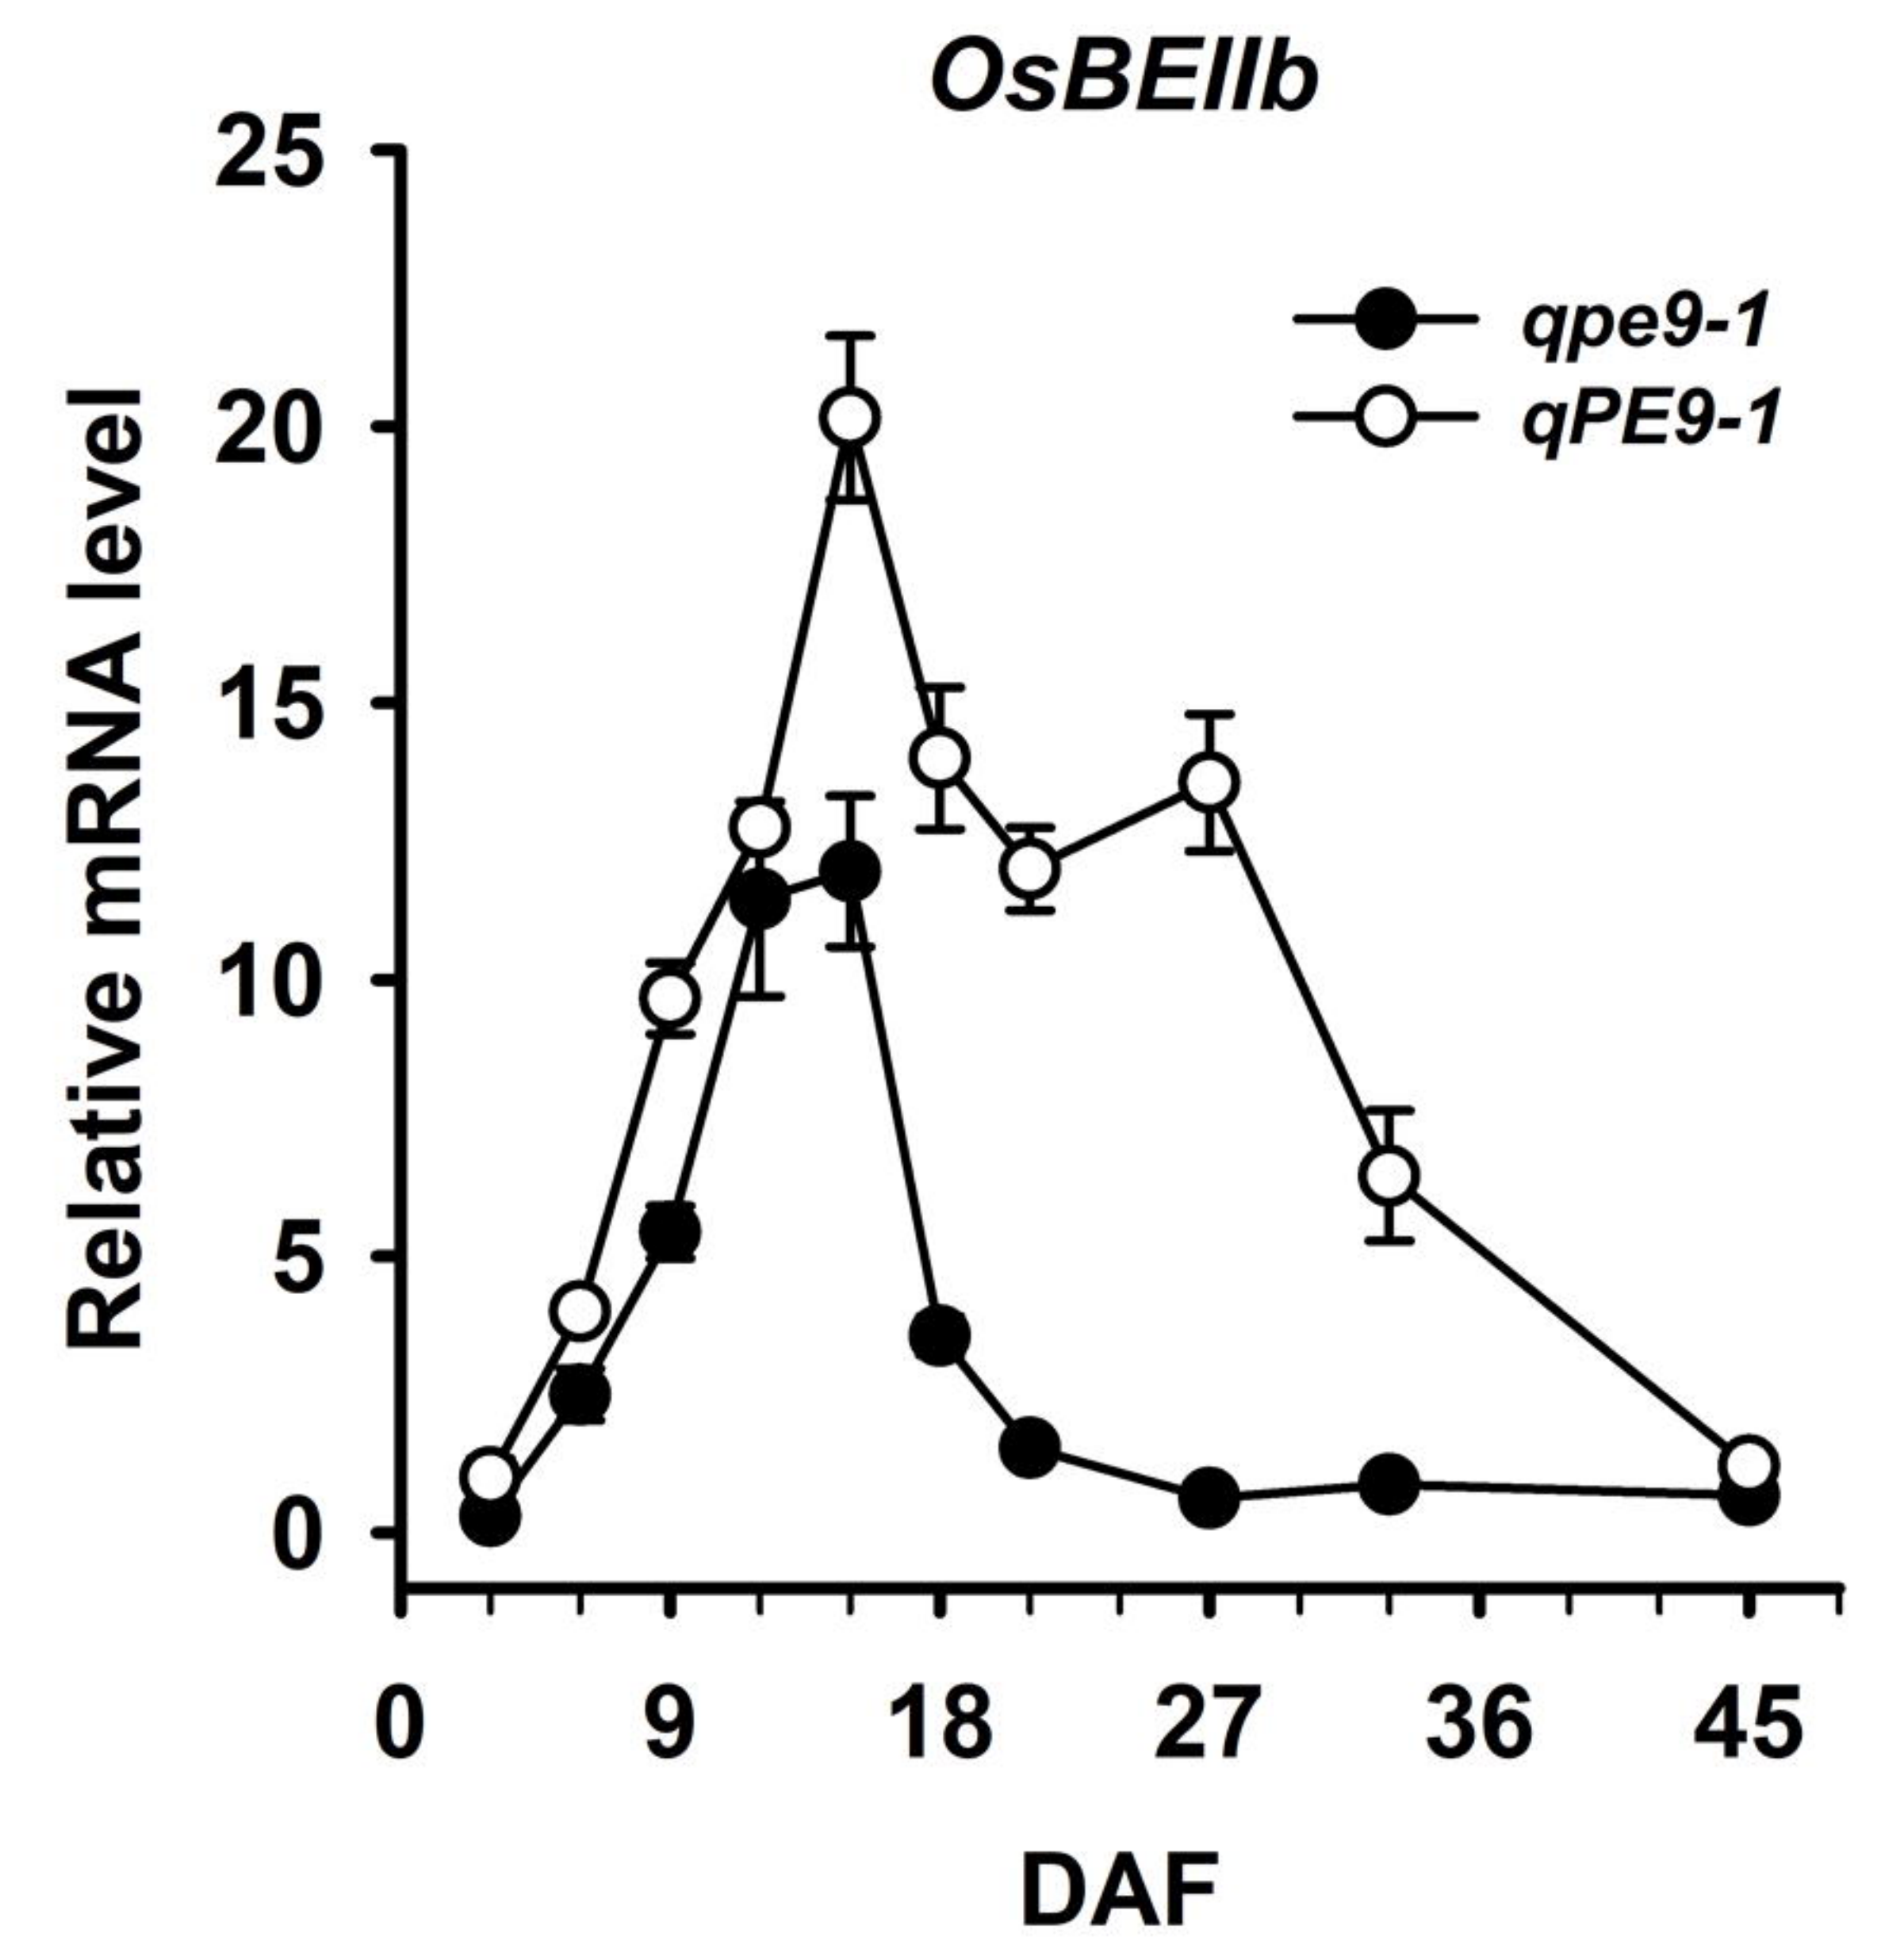**B**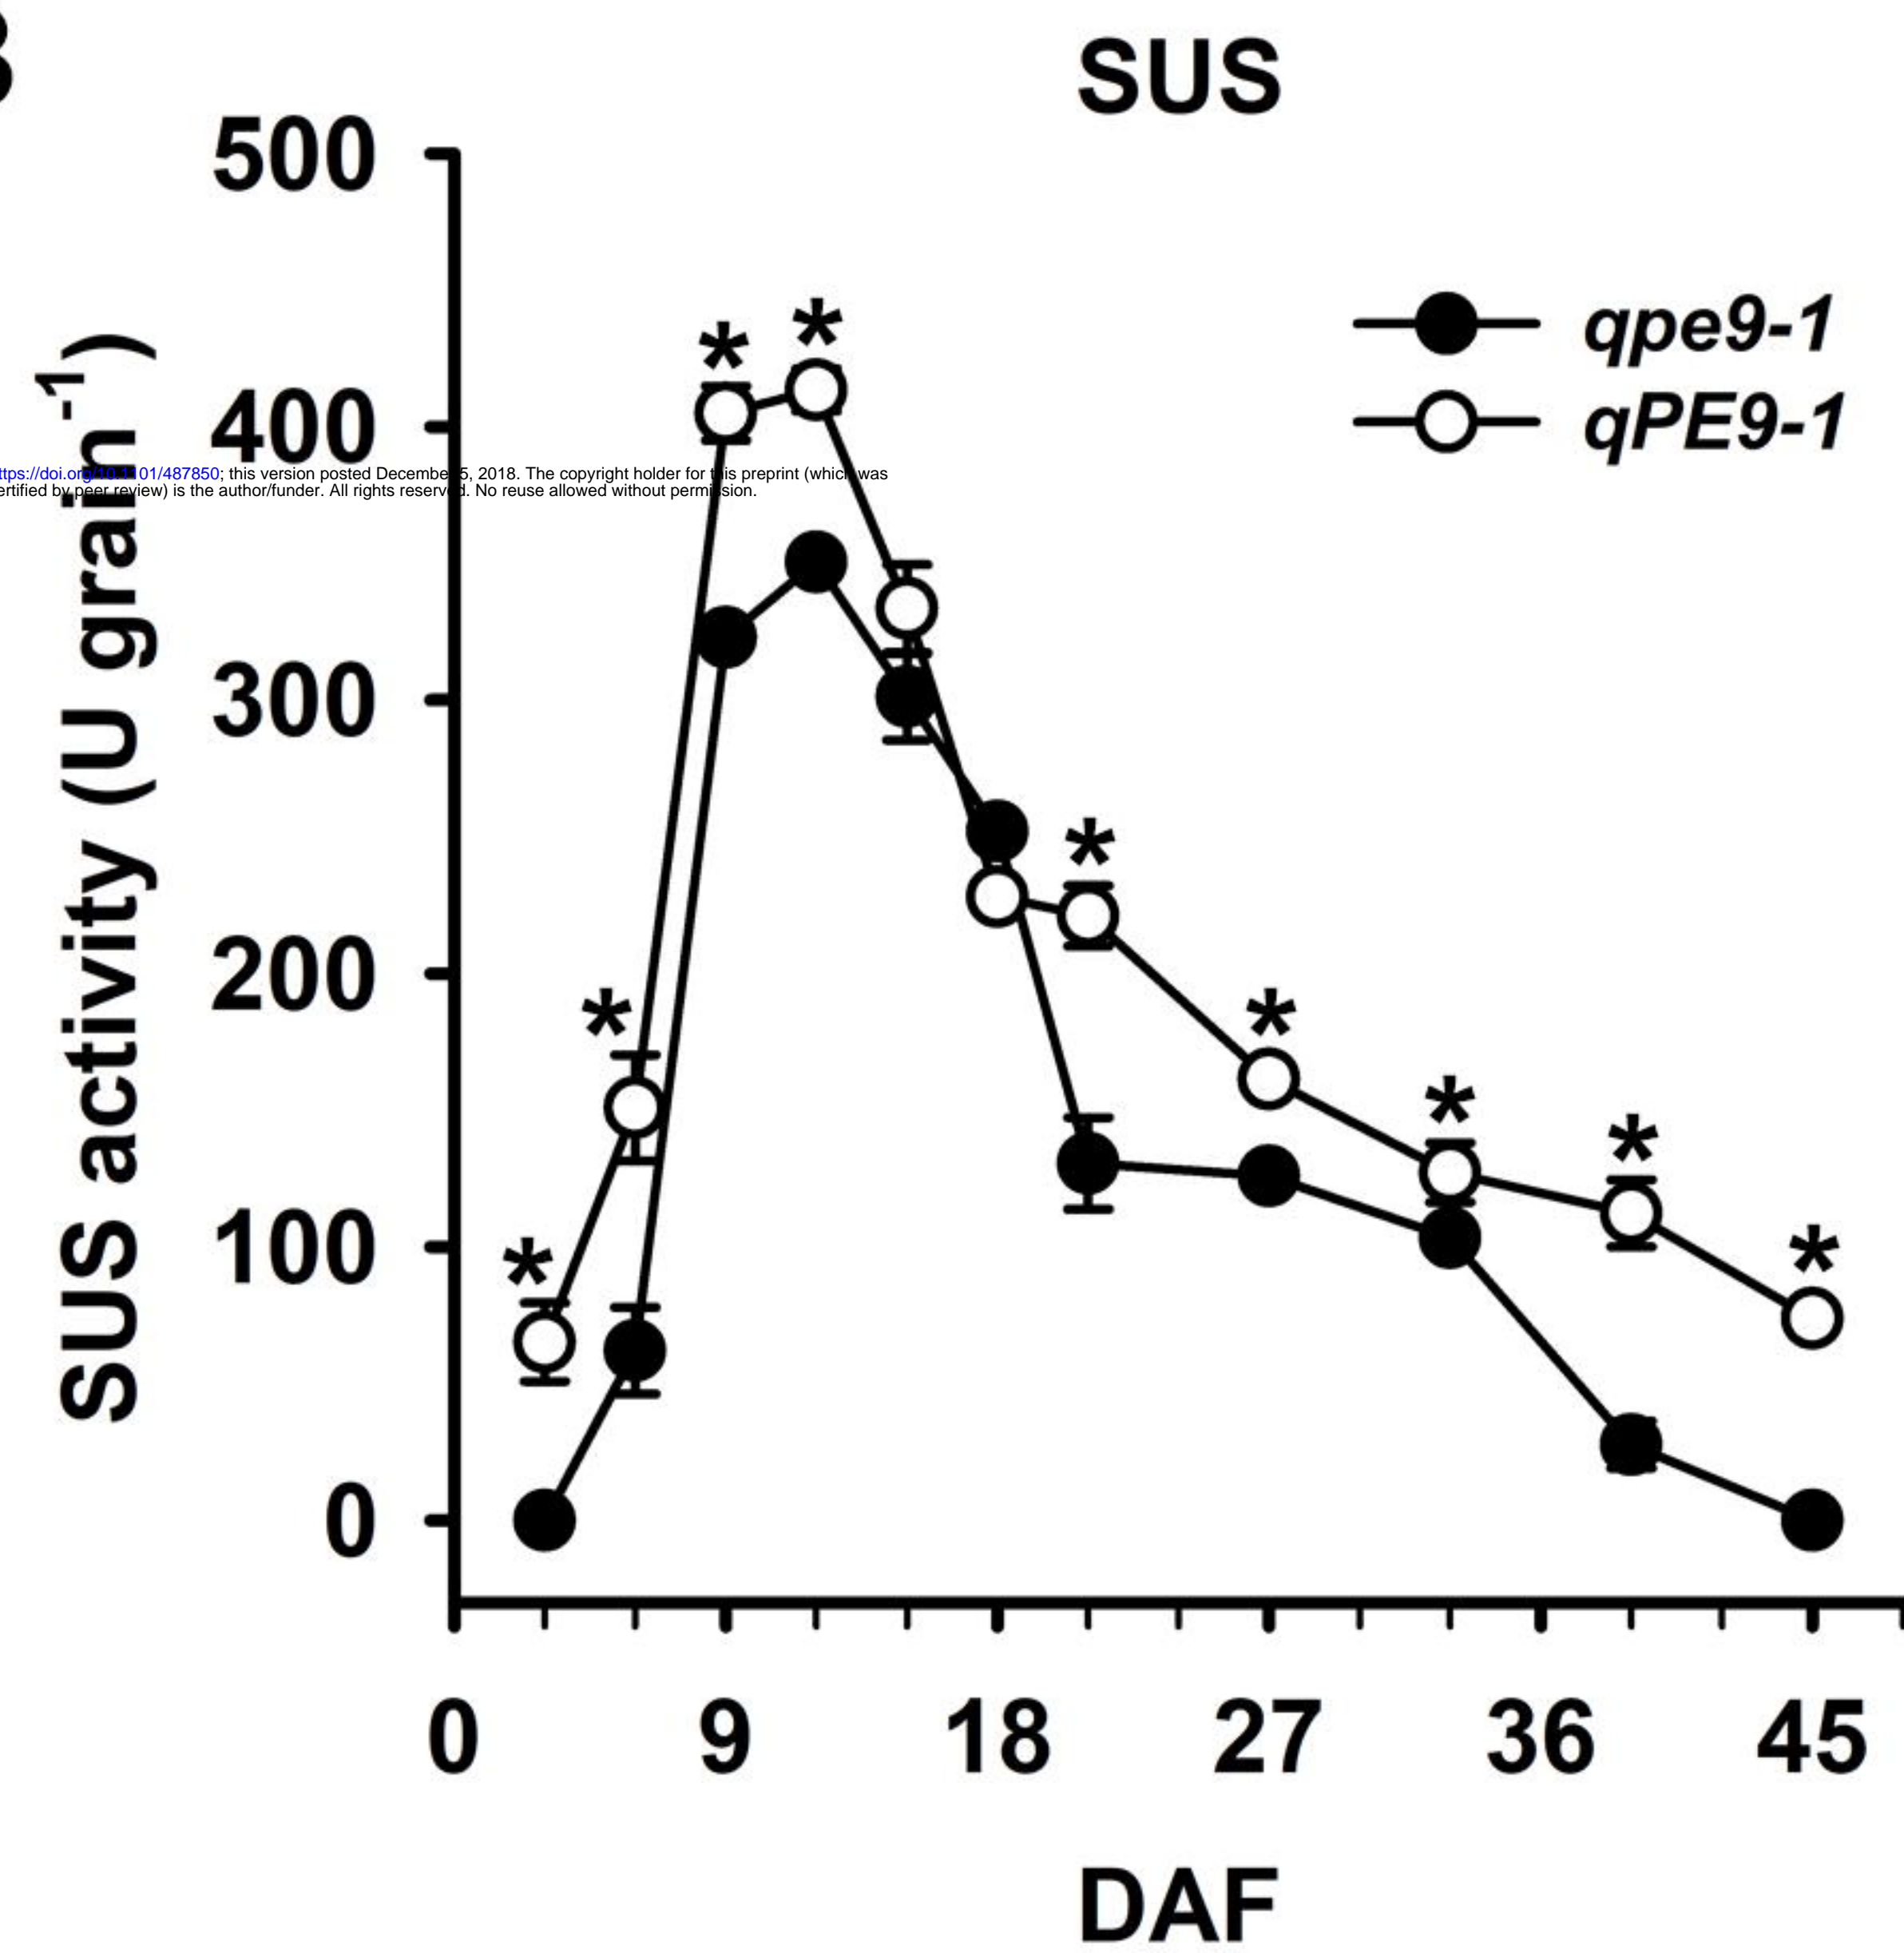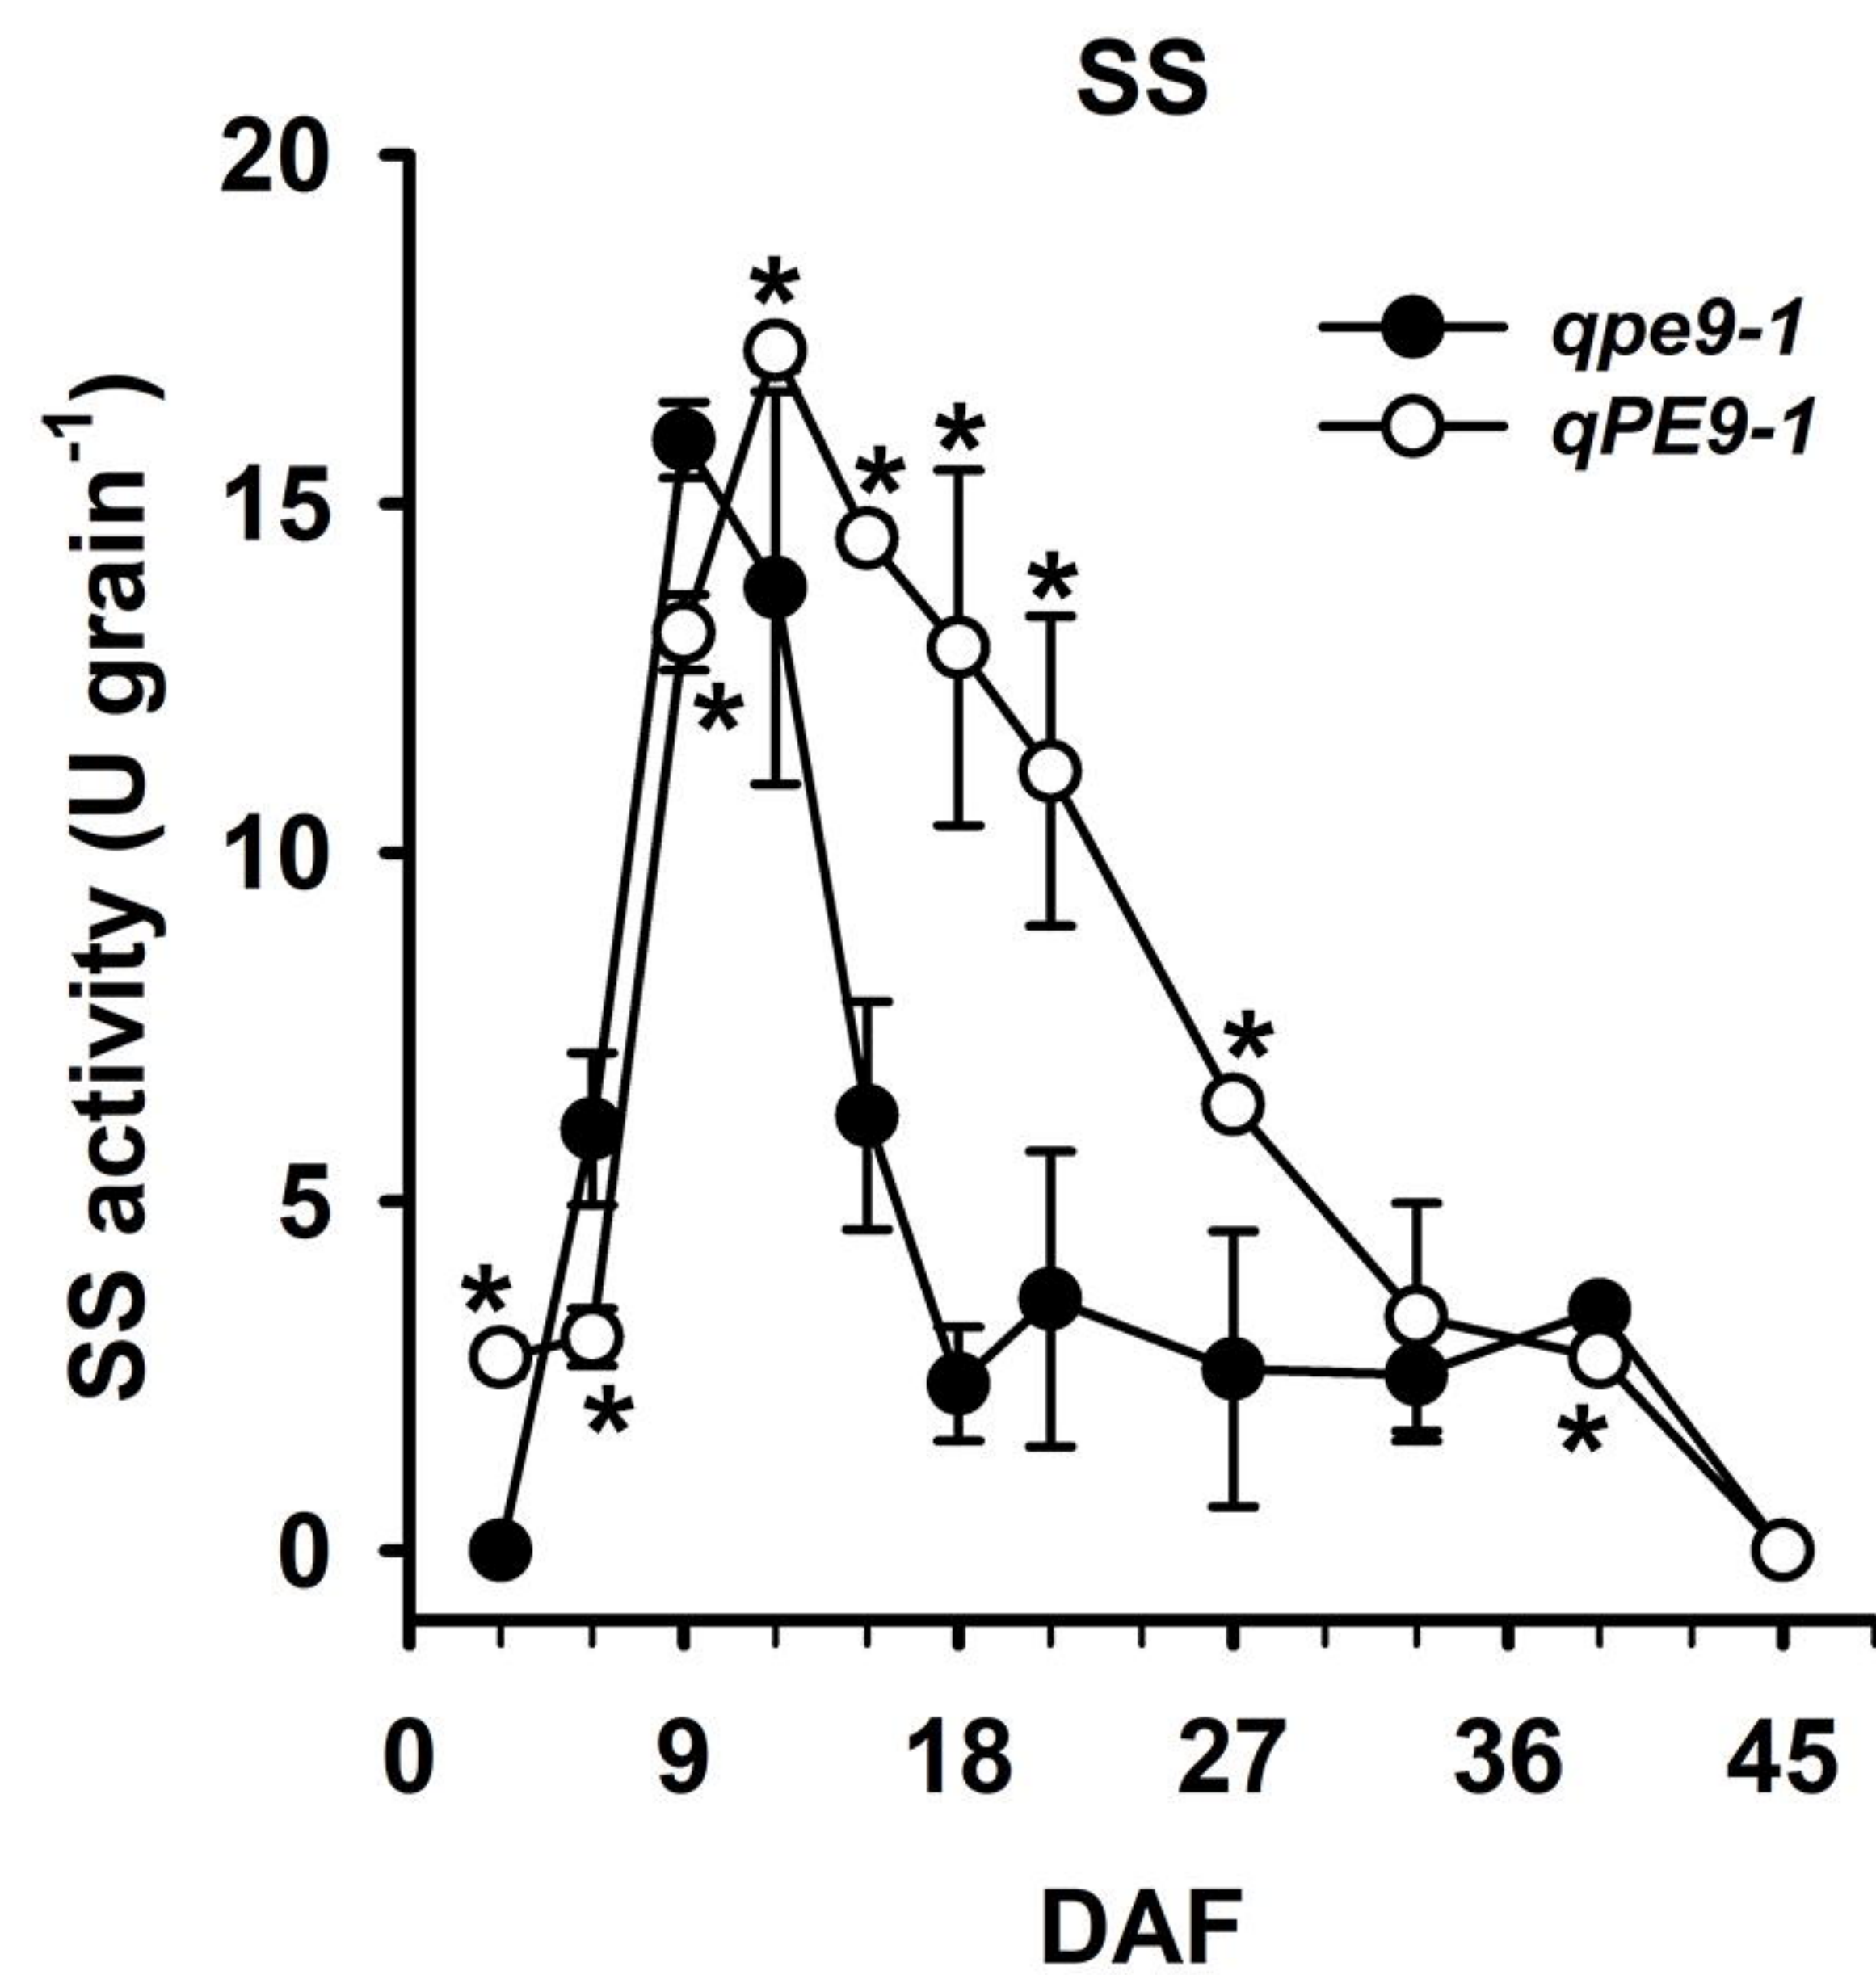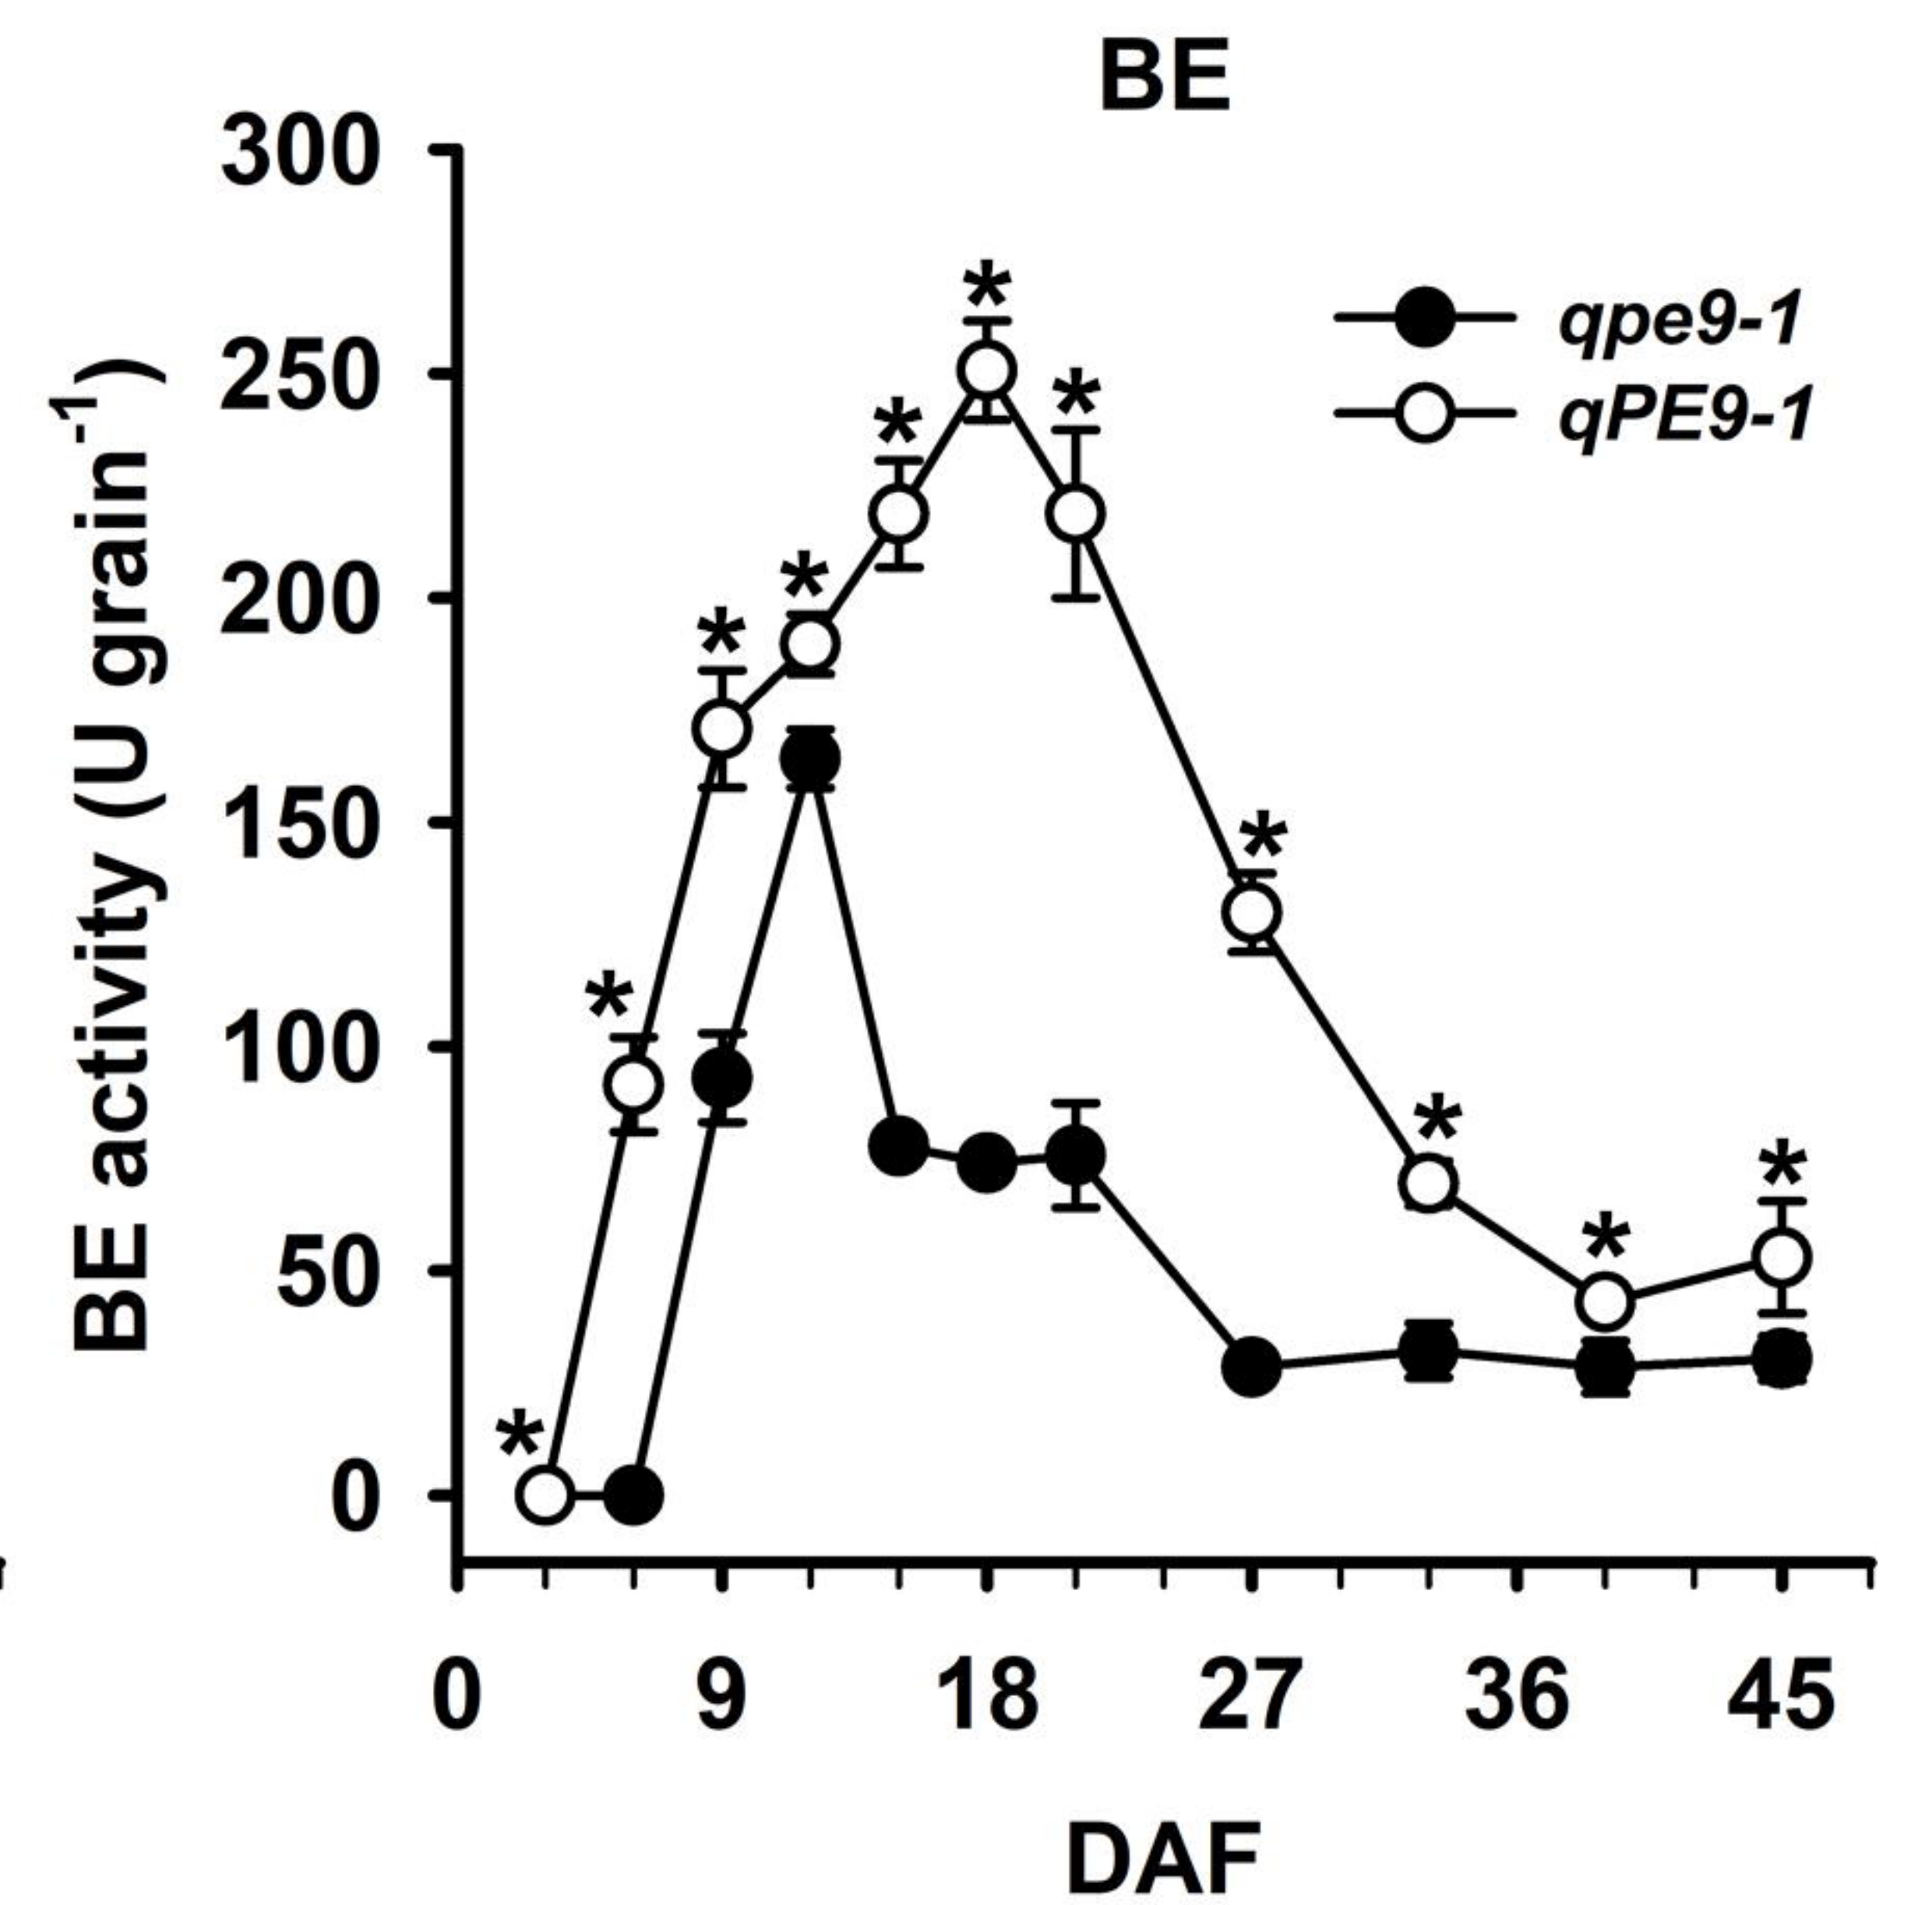

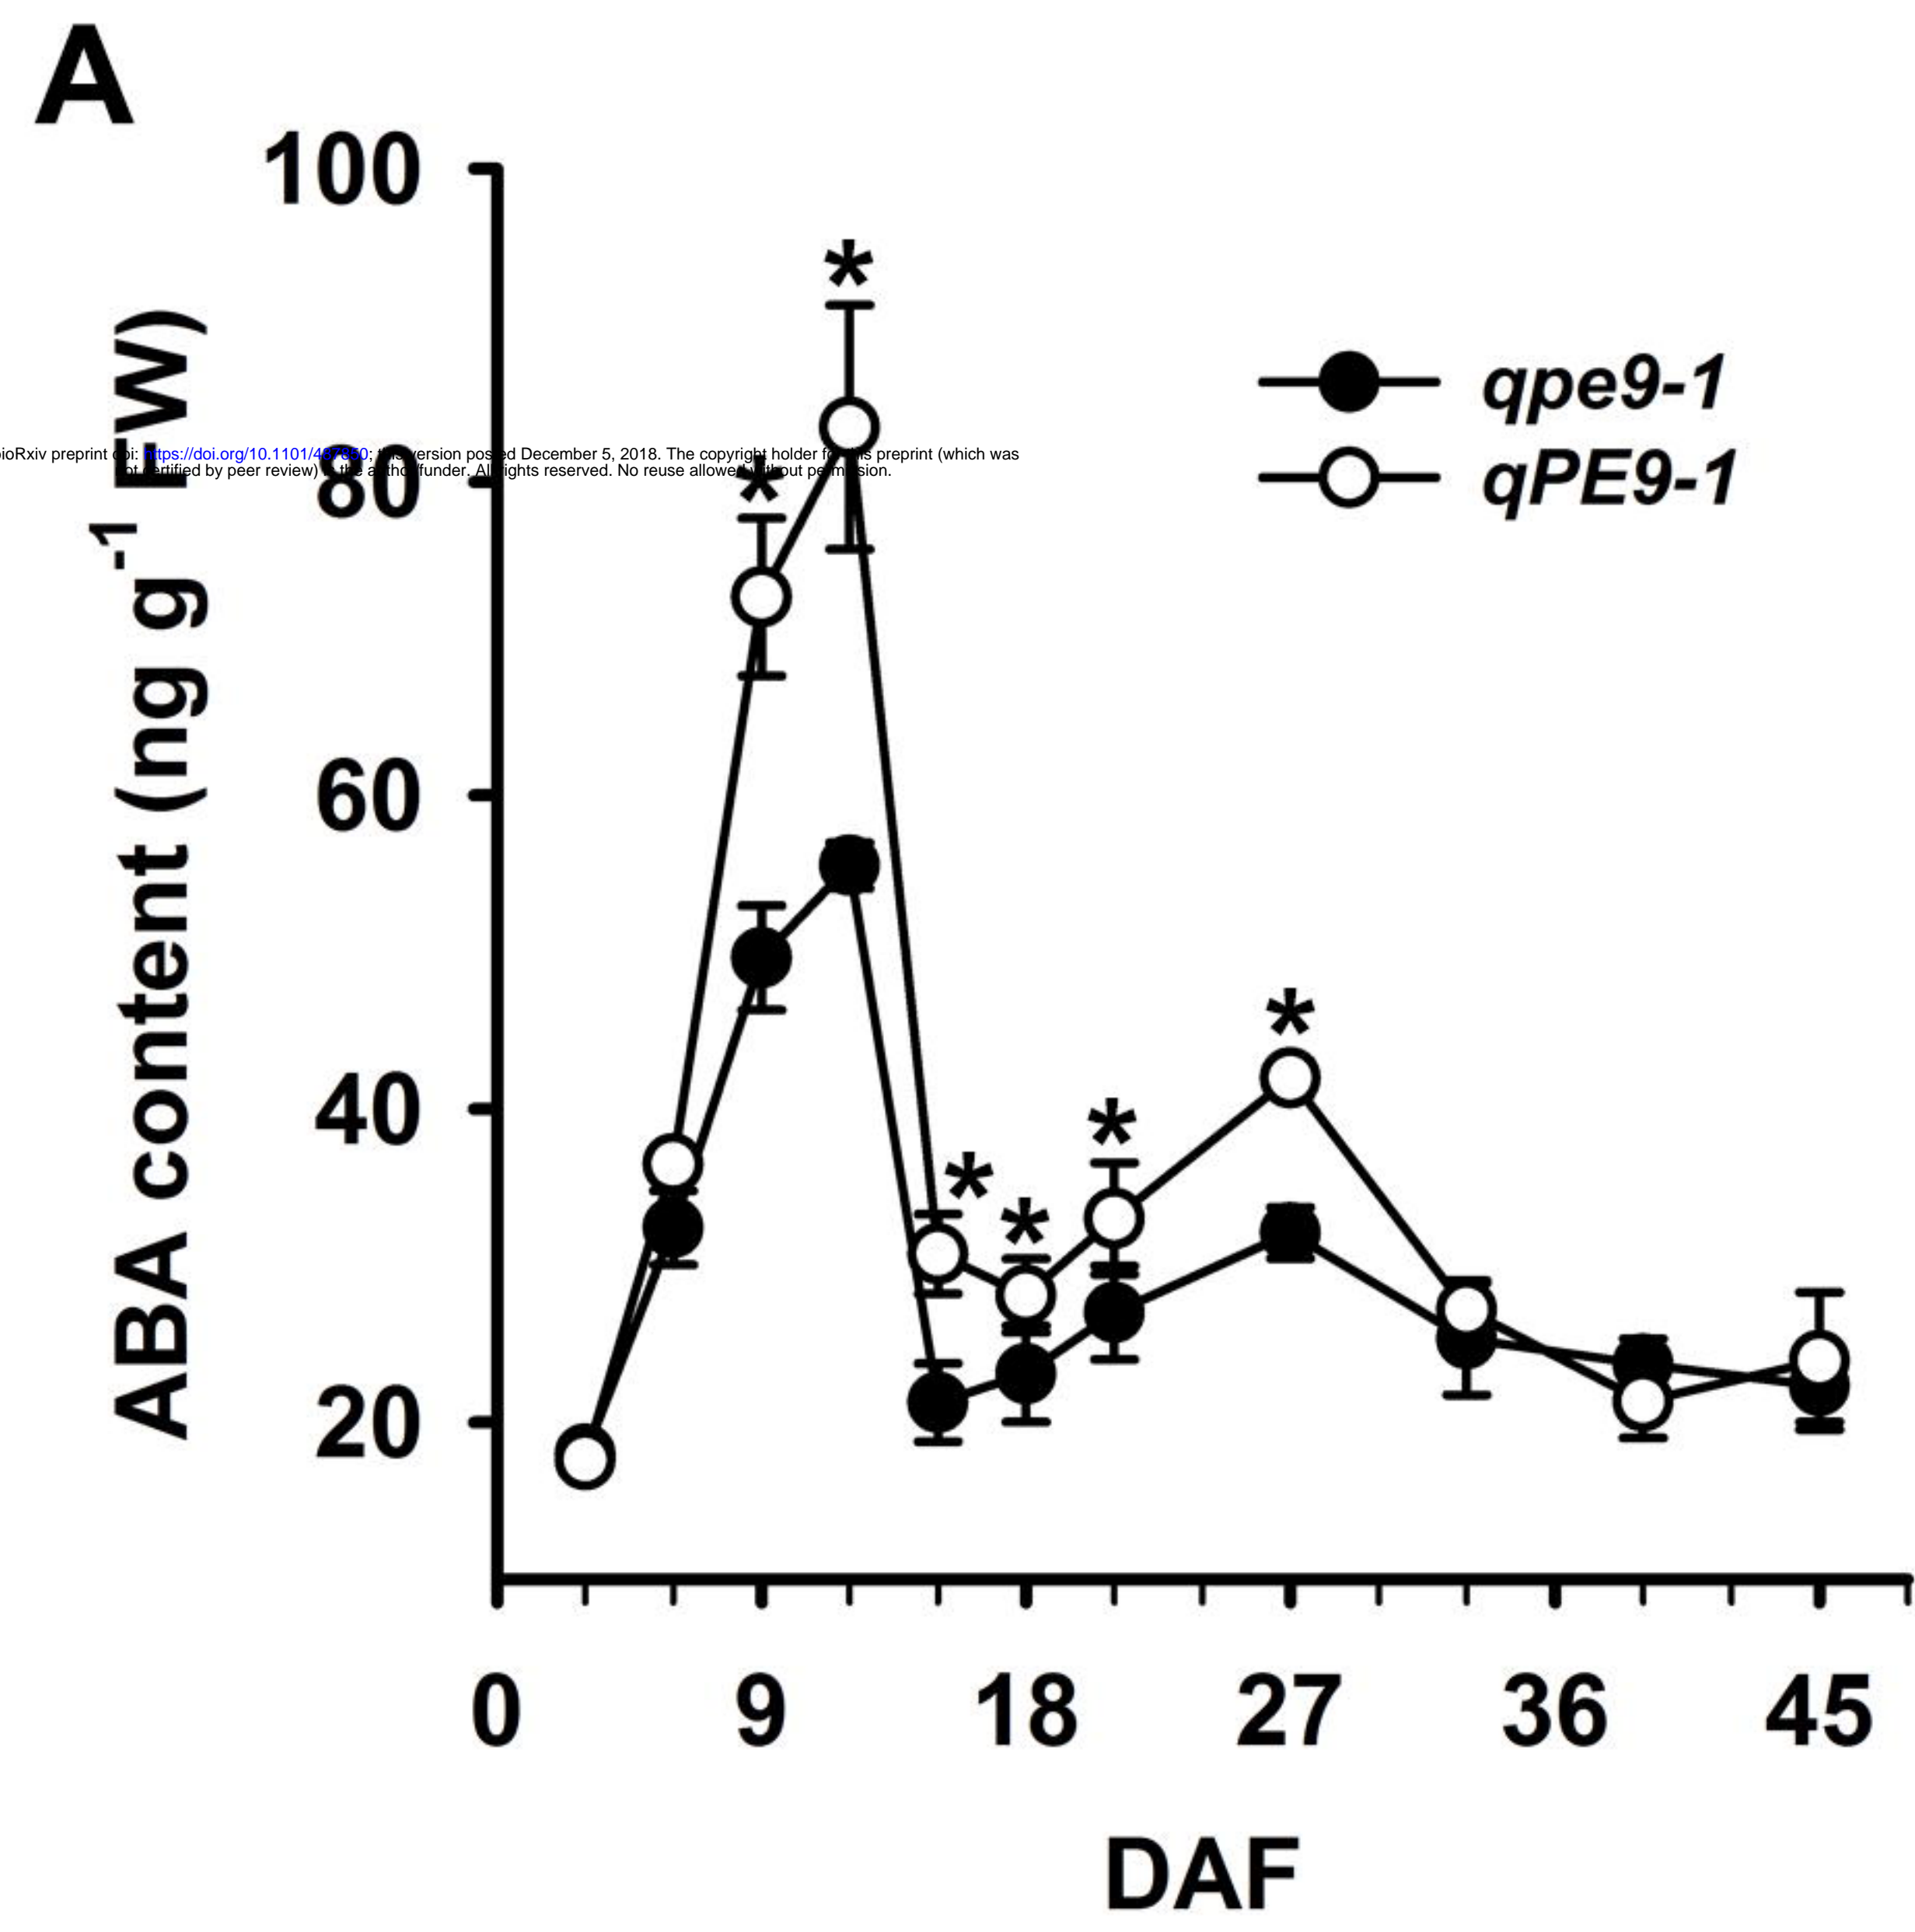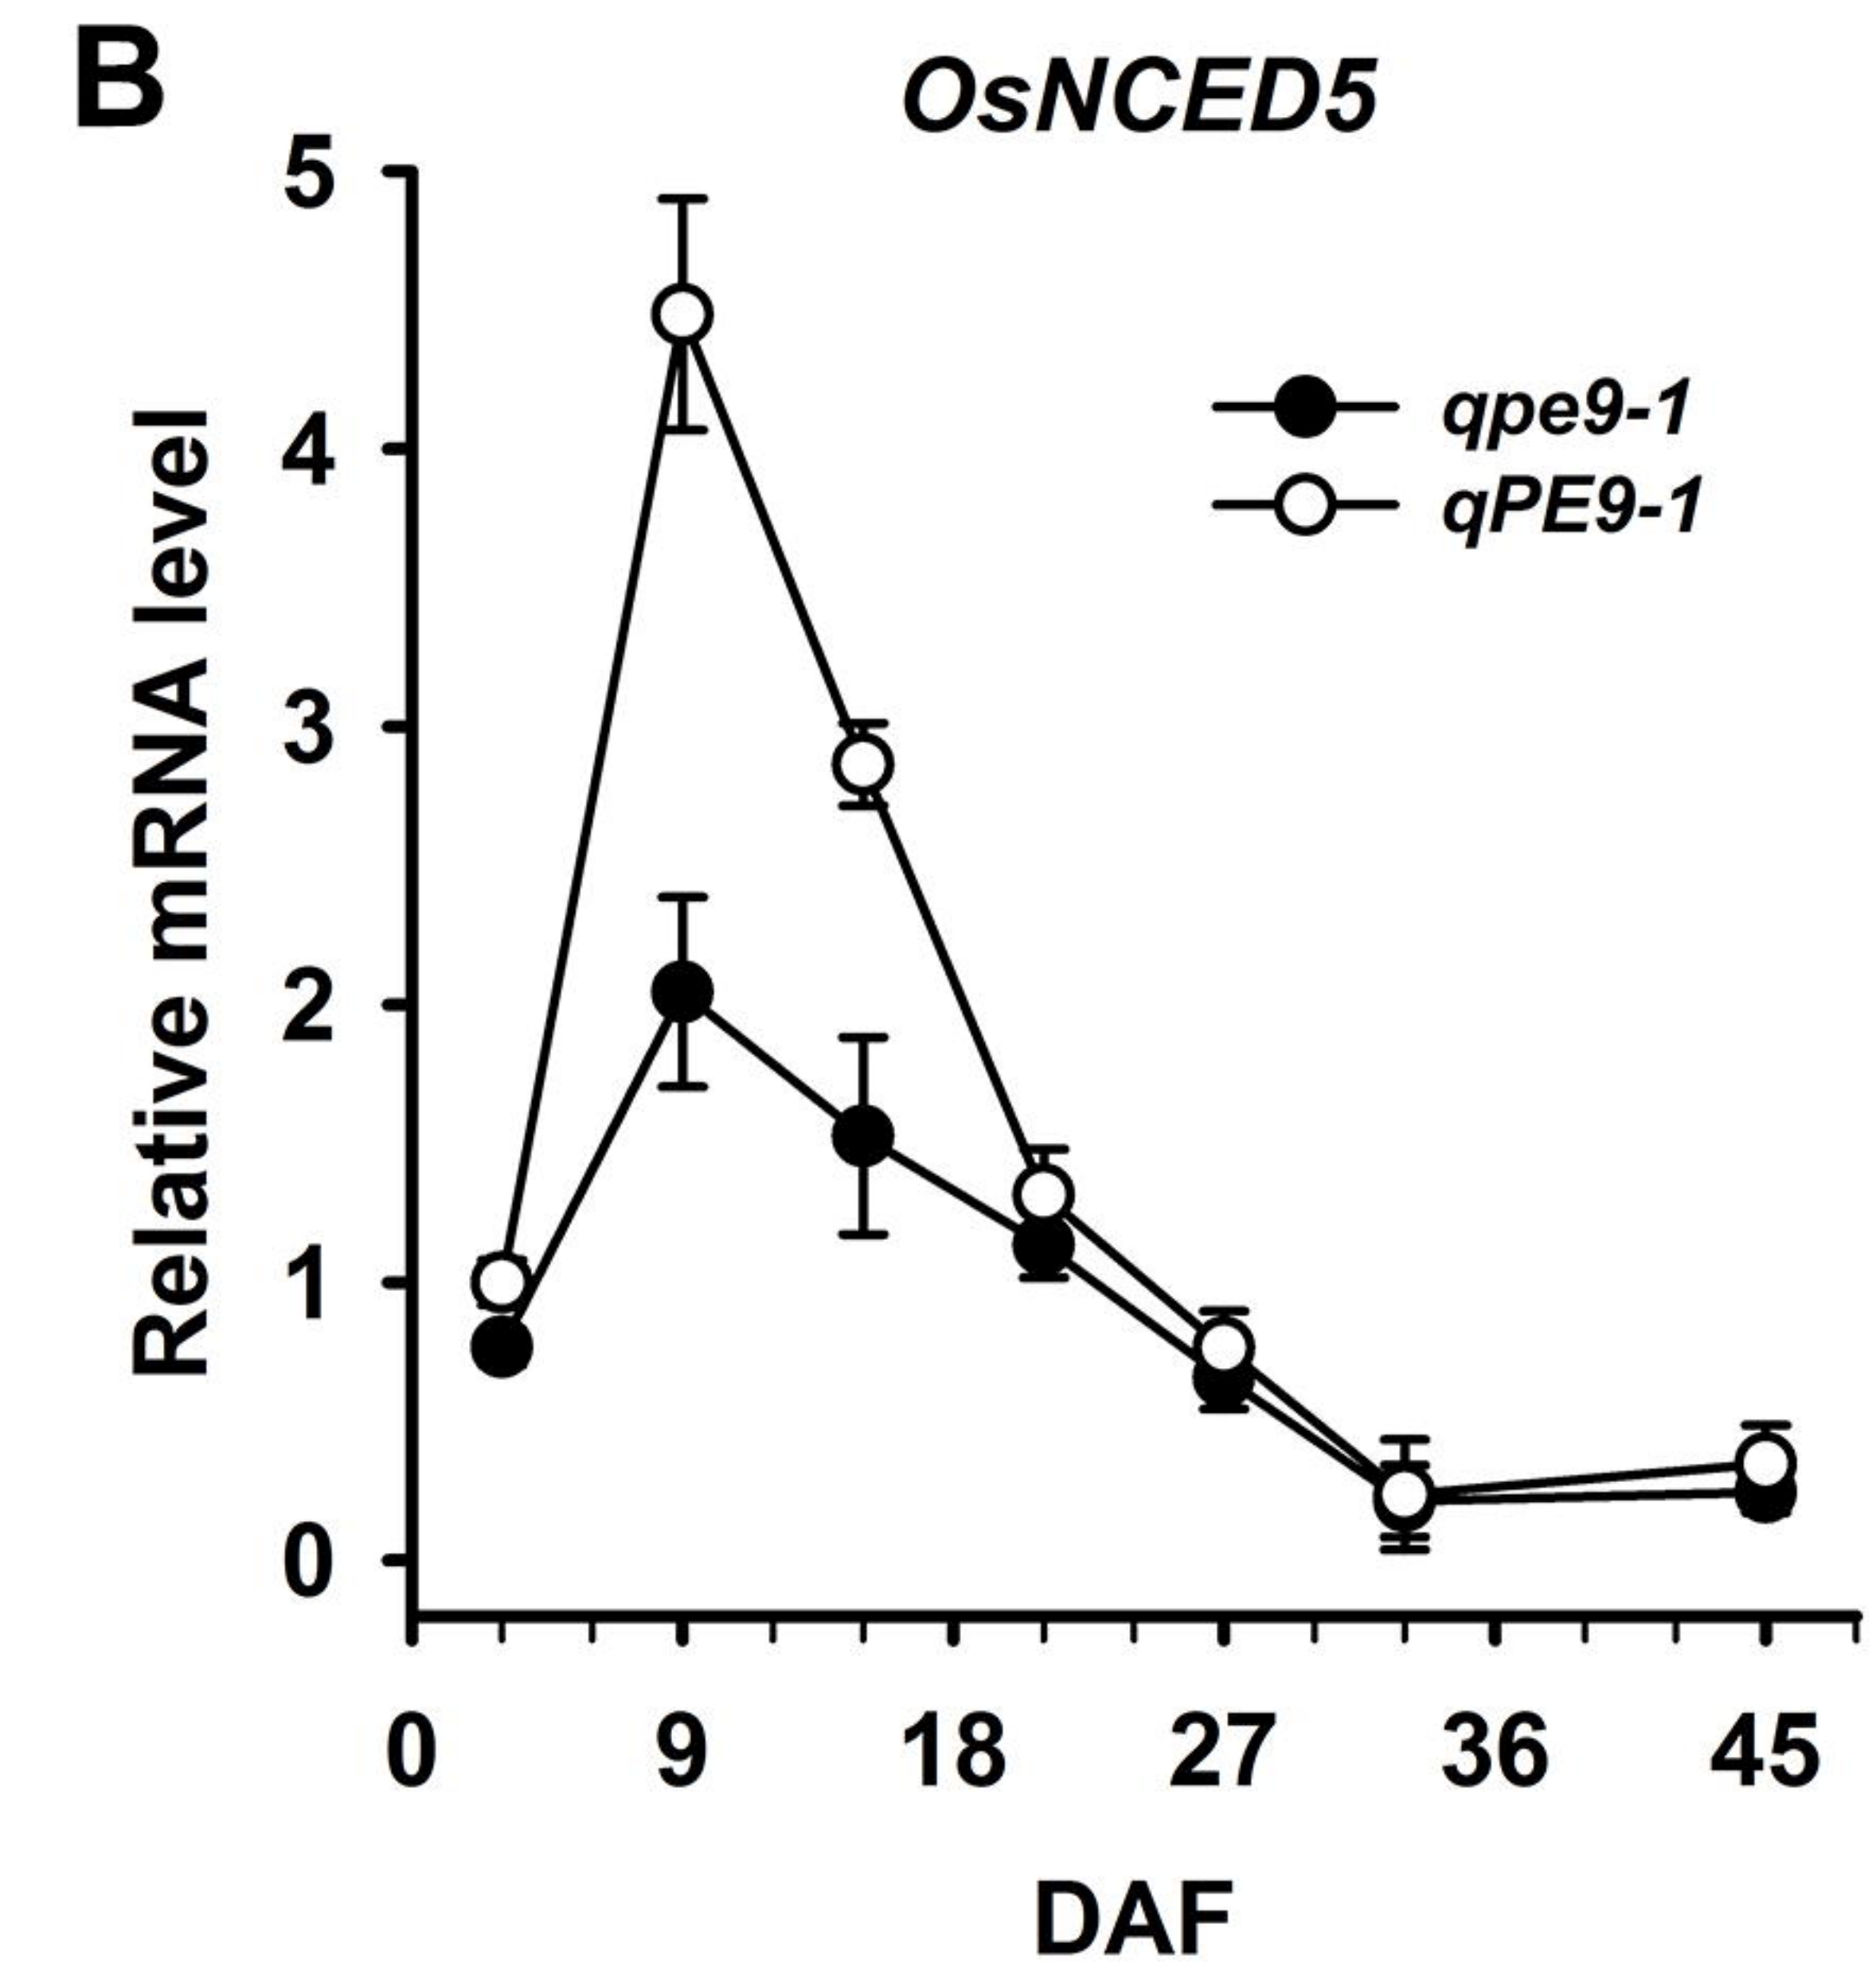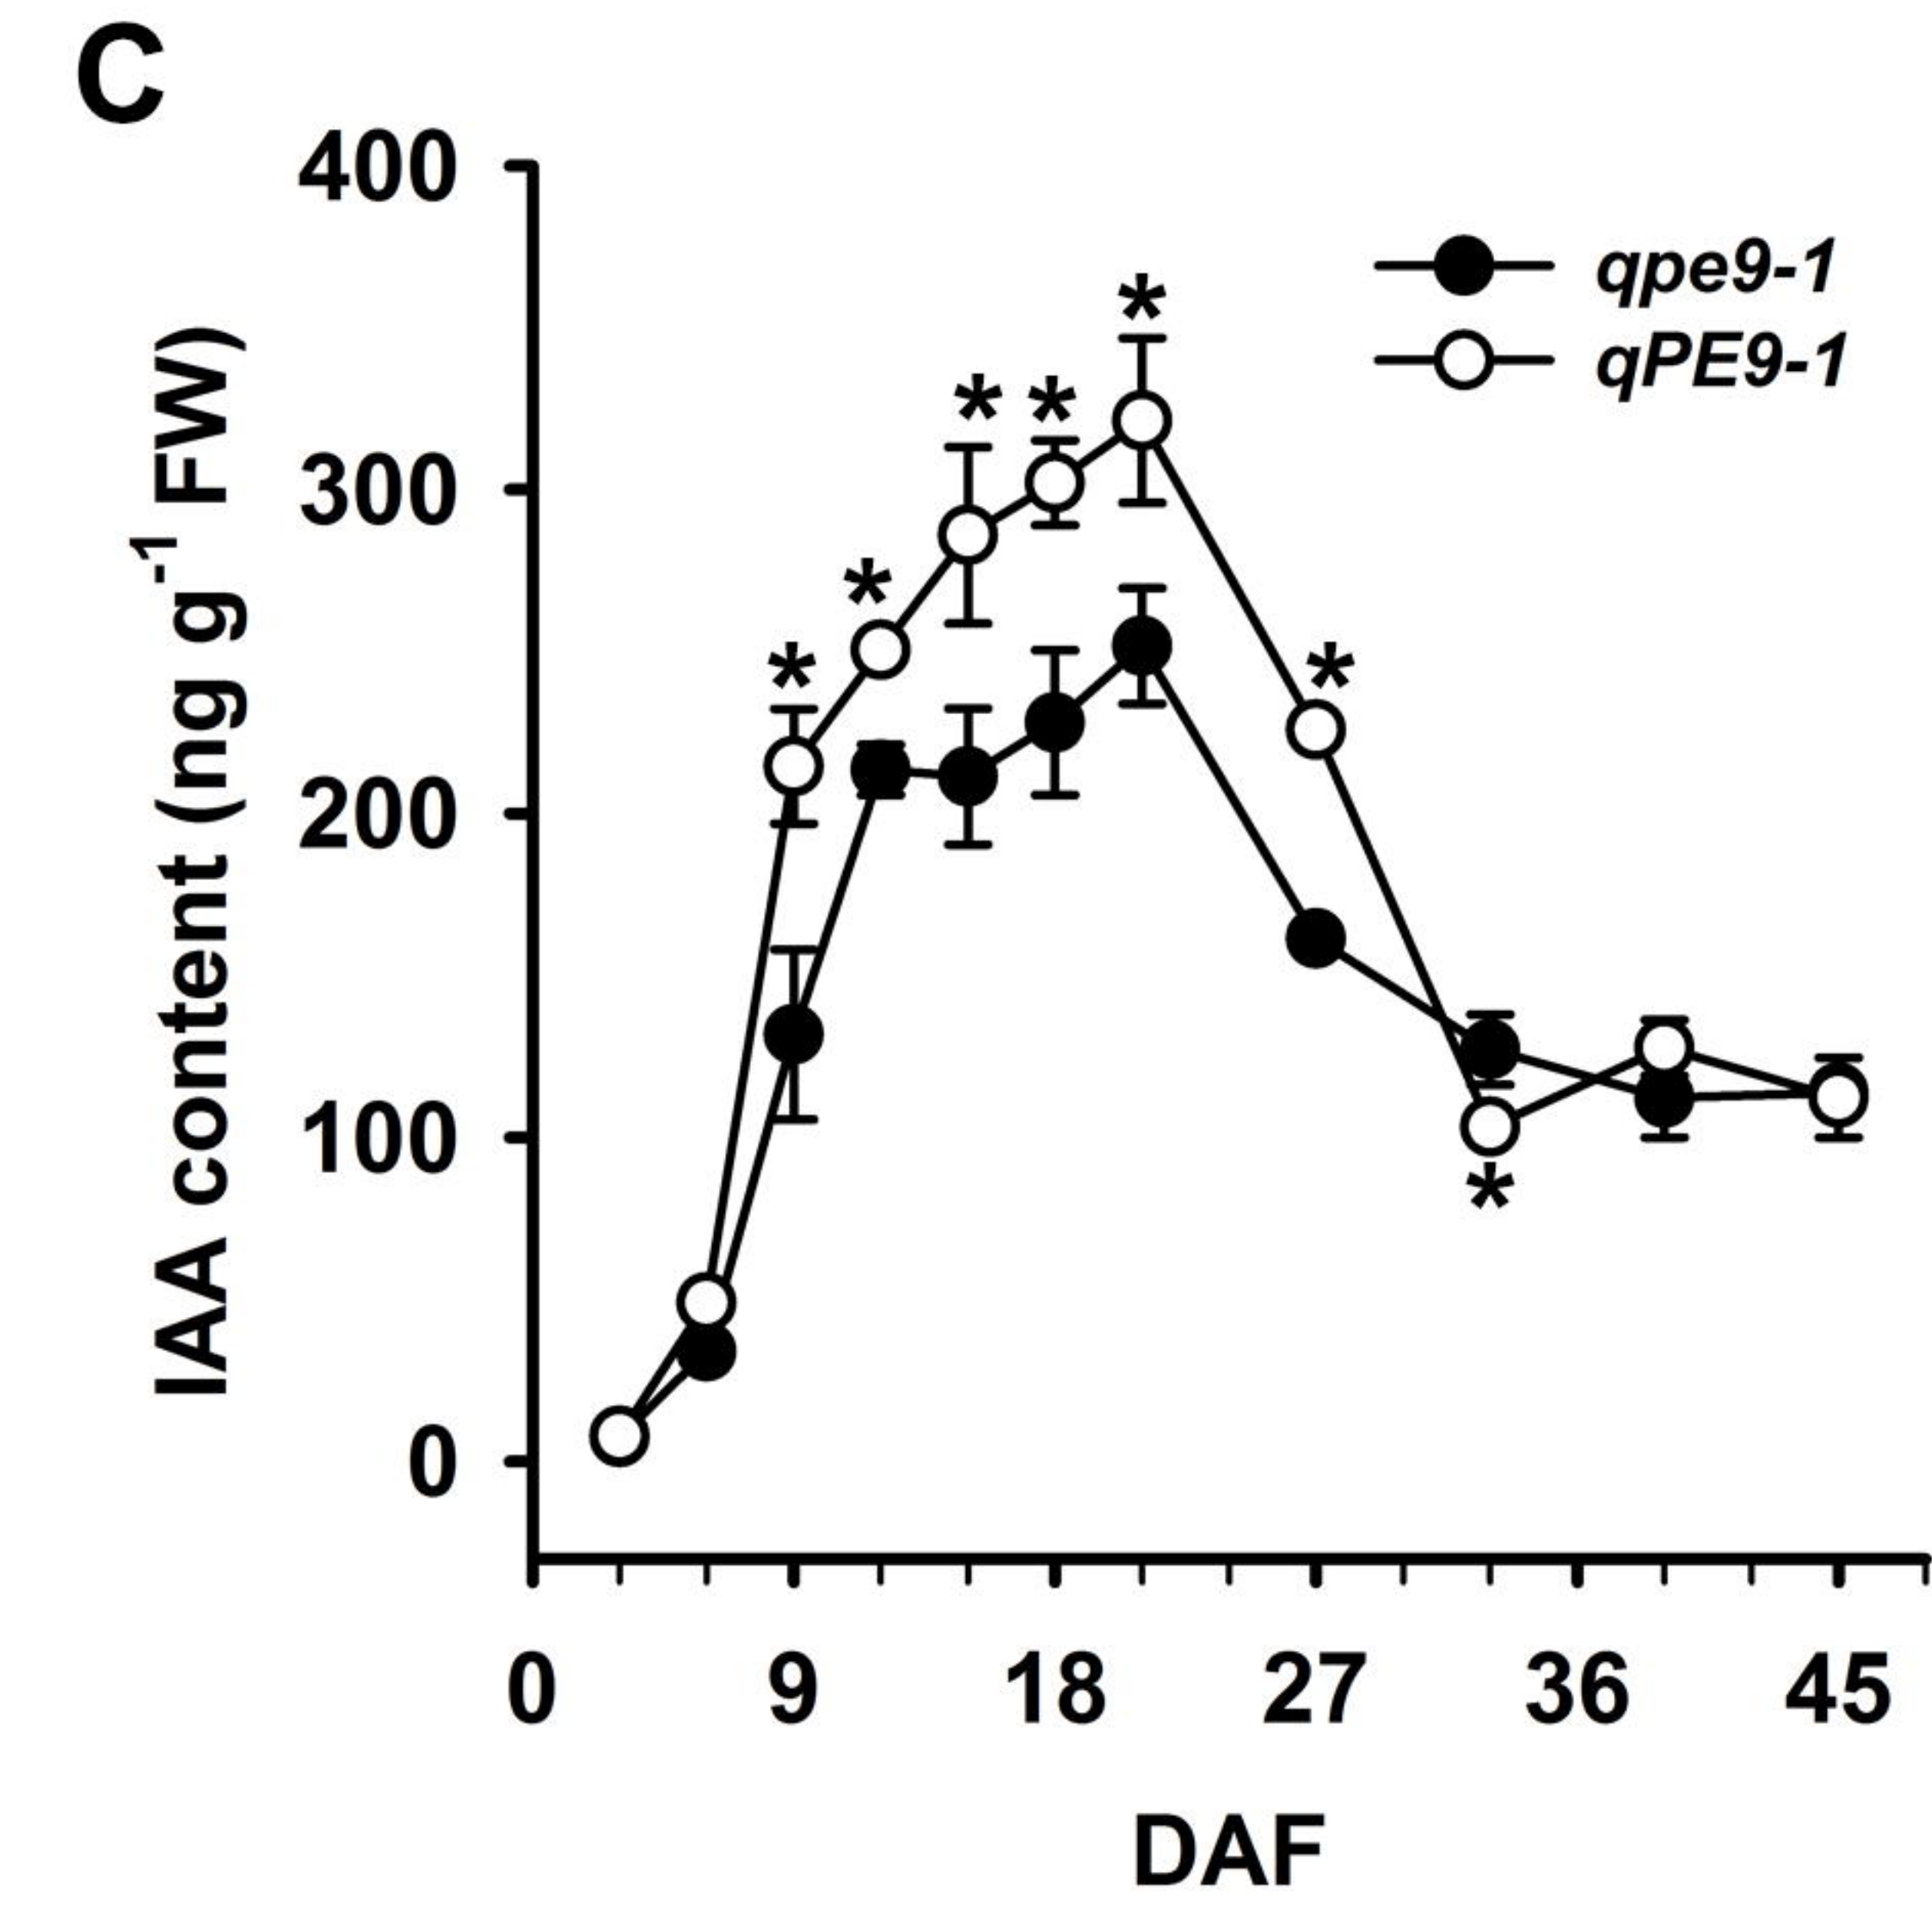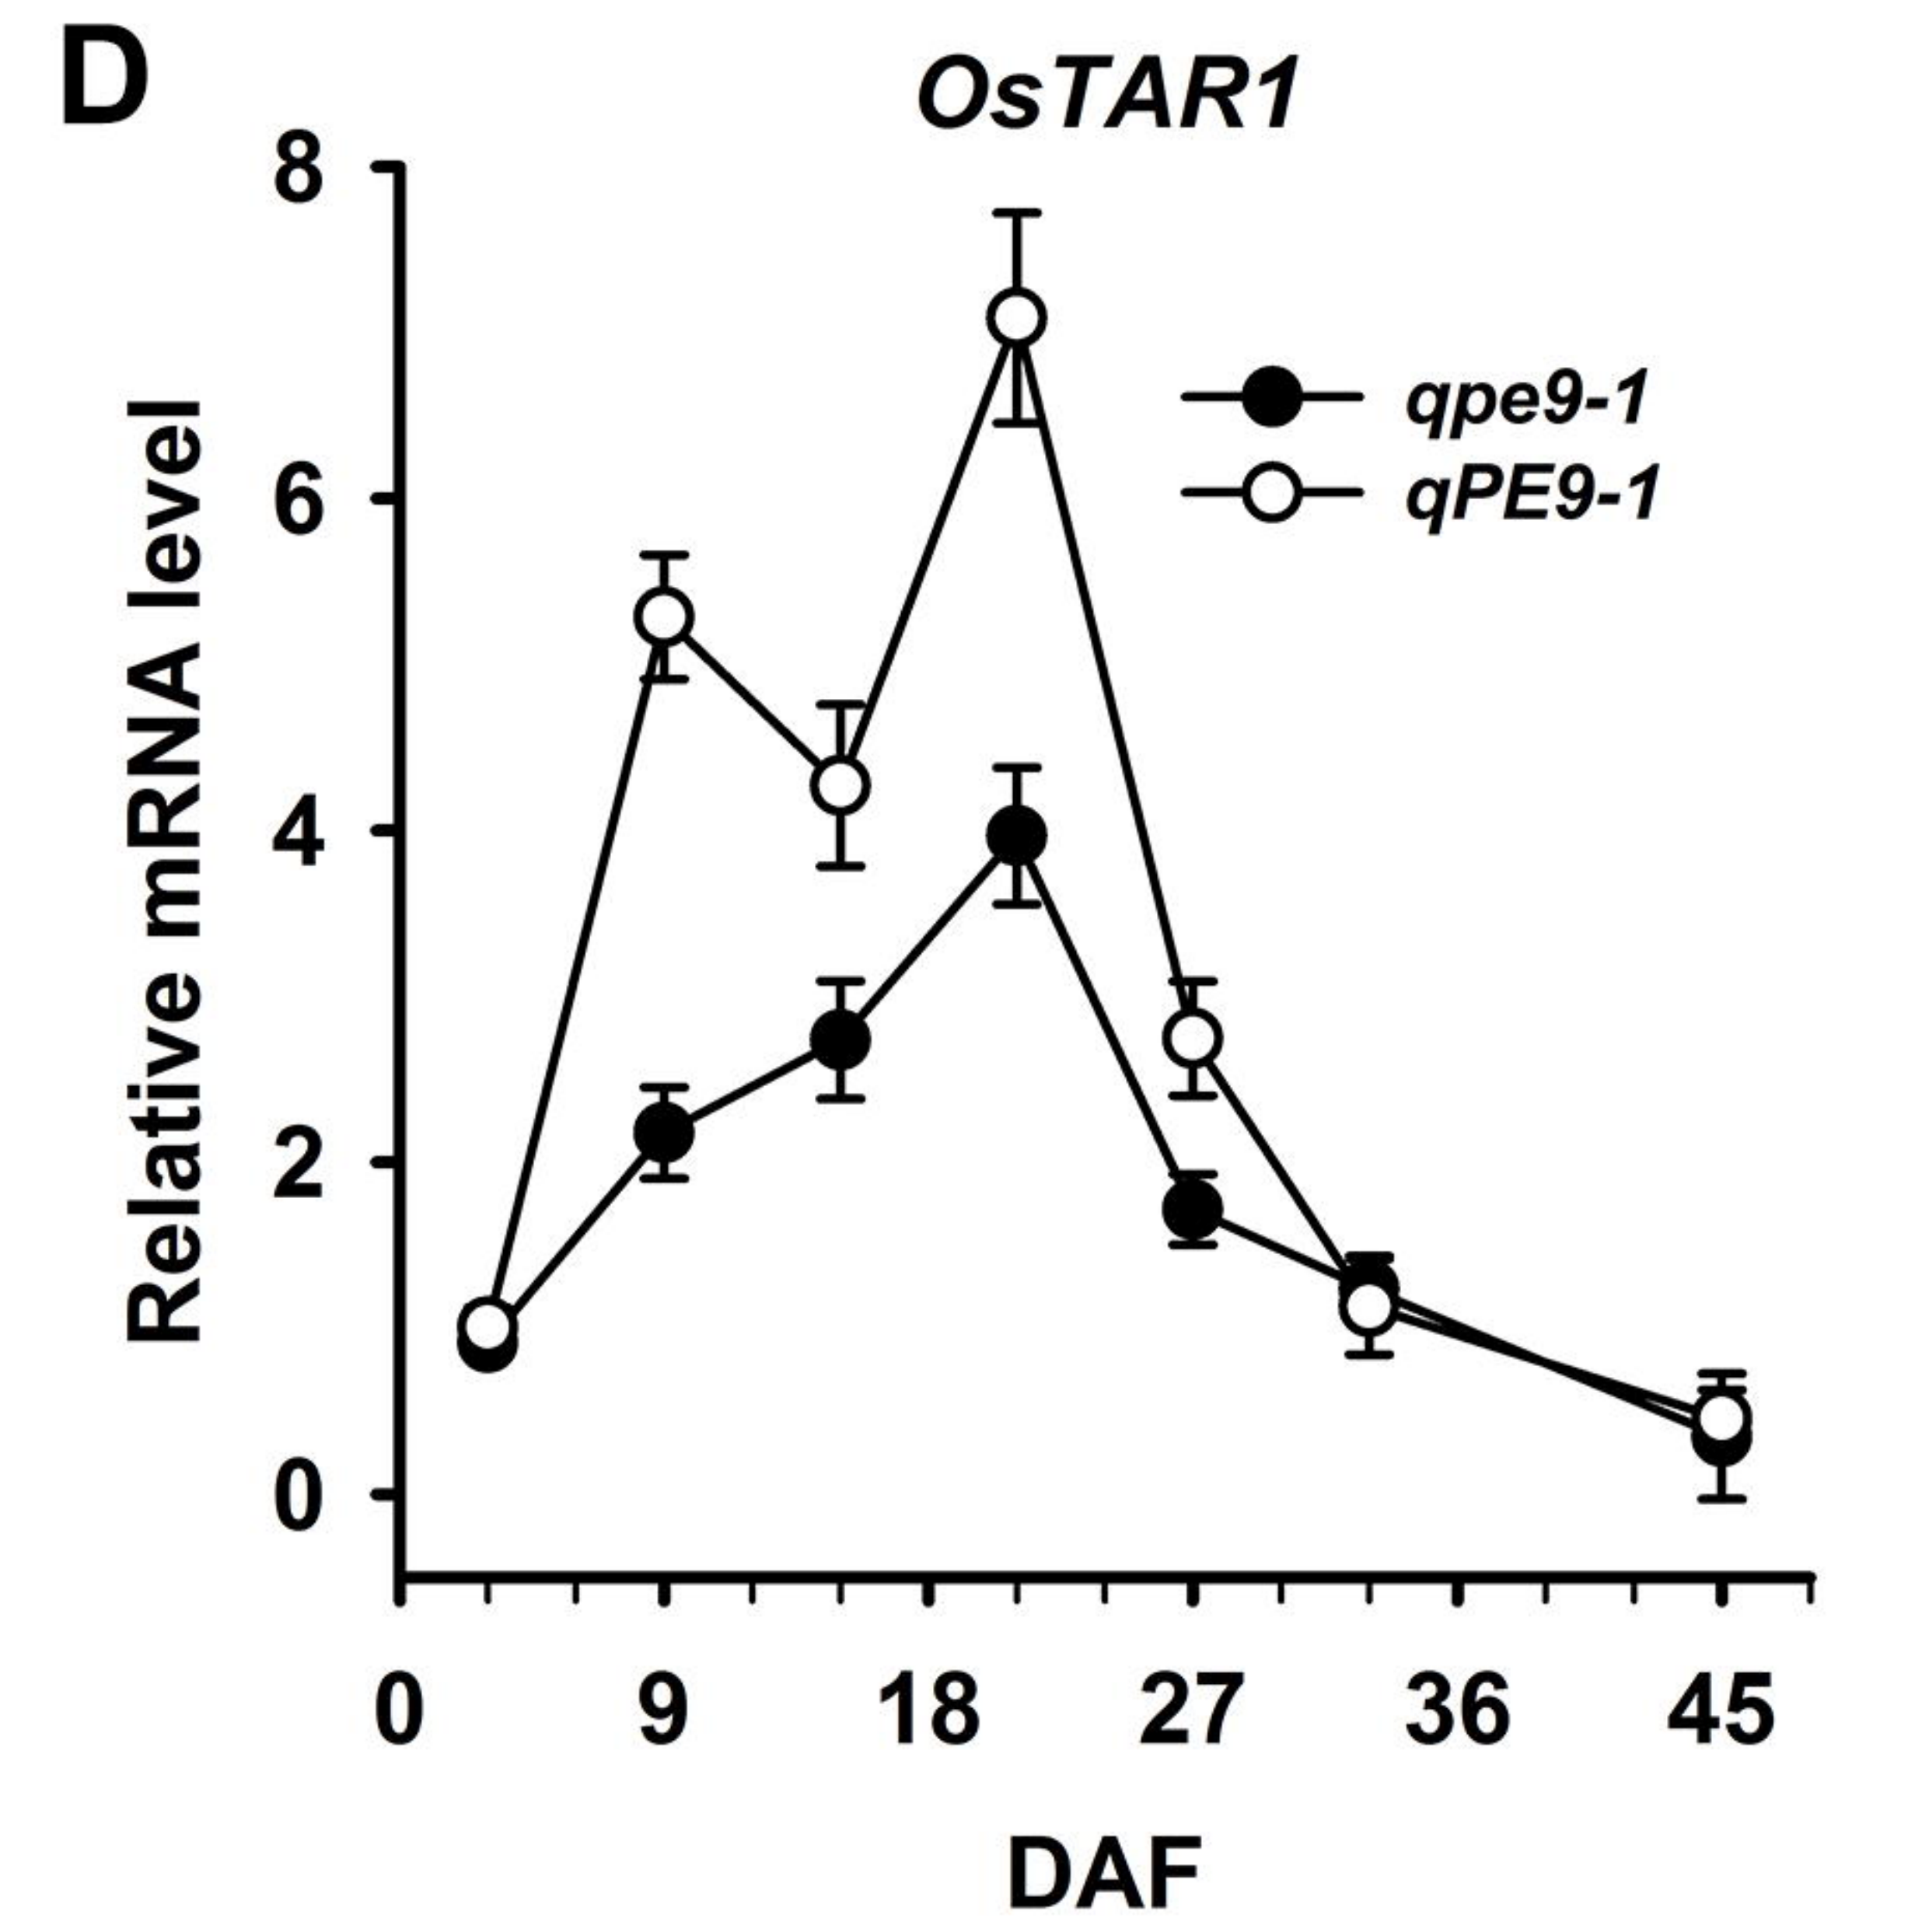

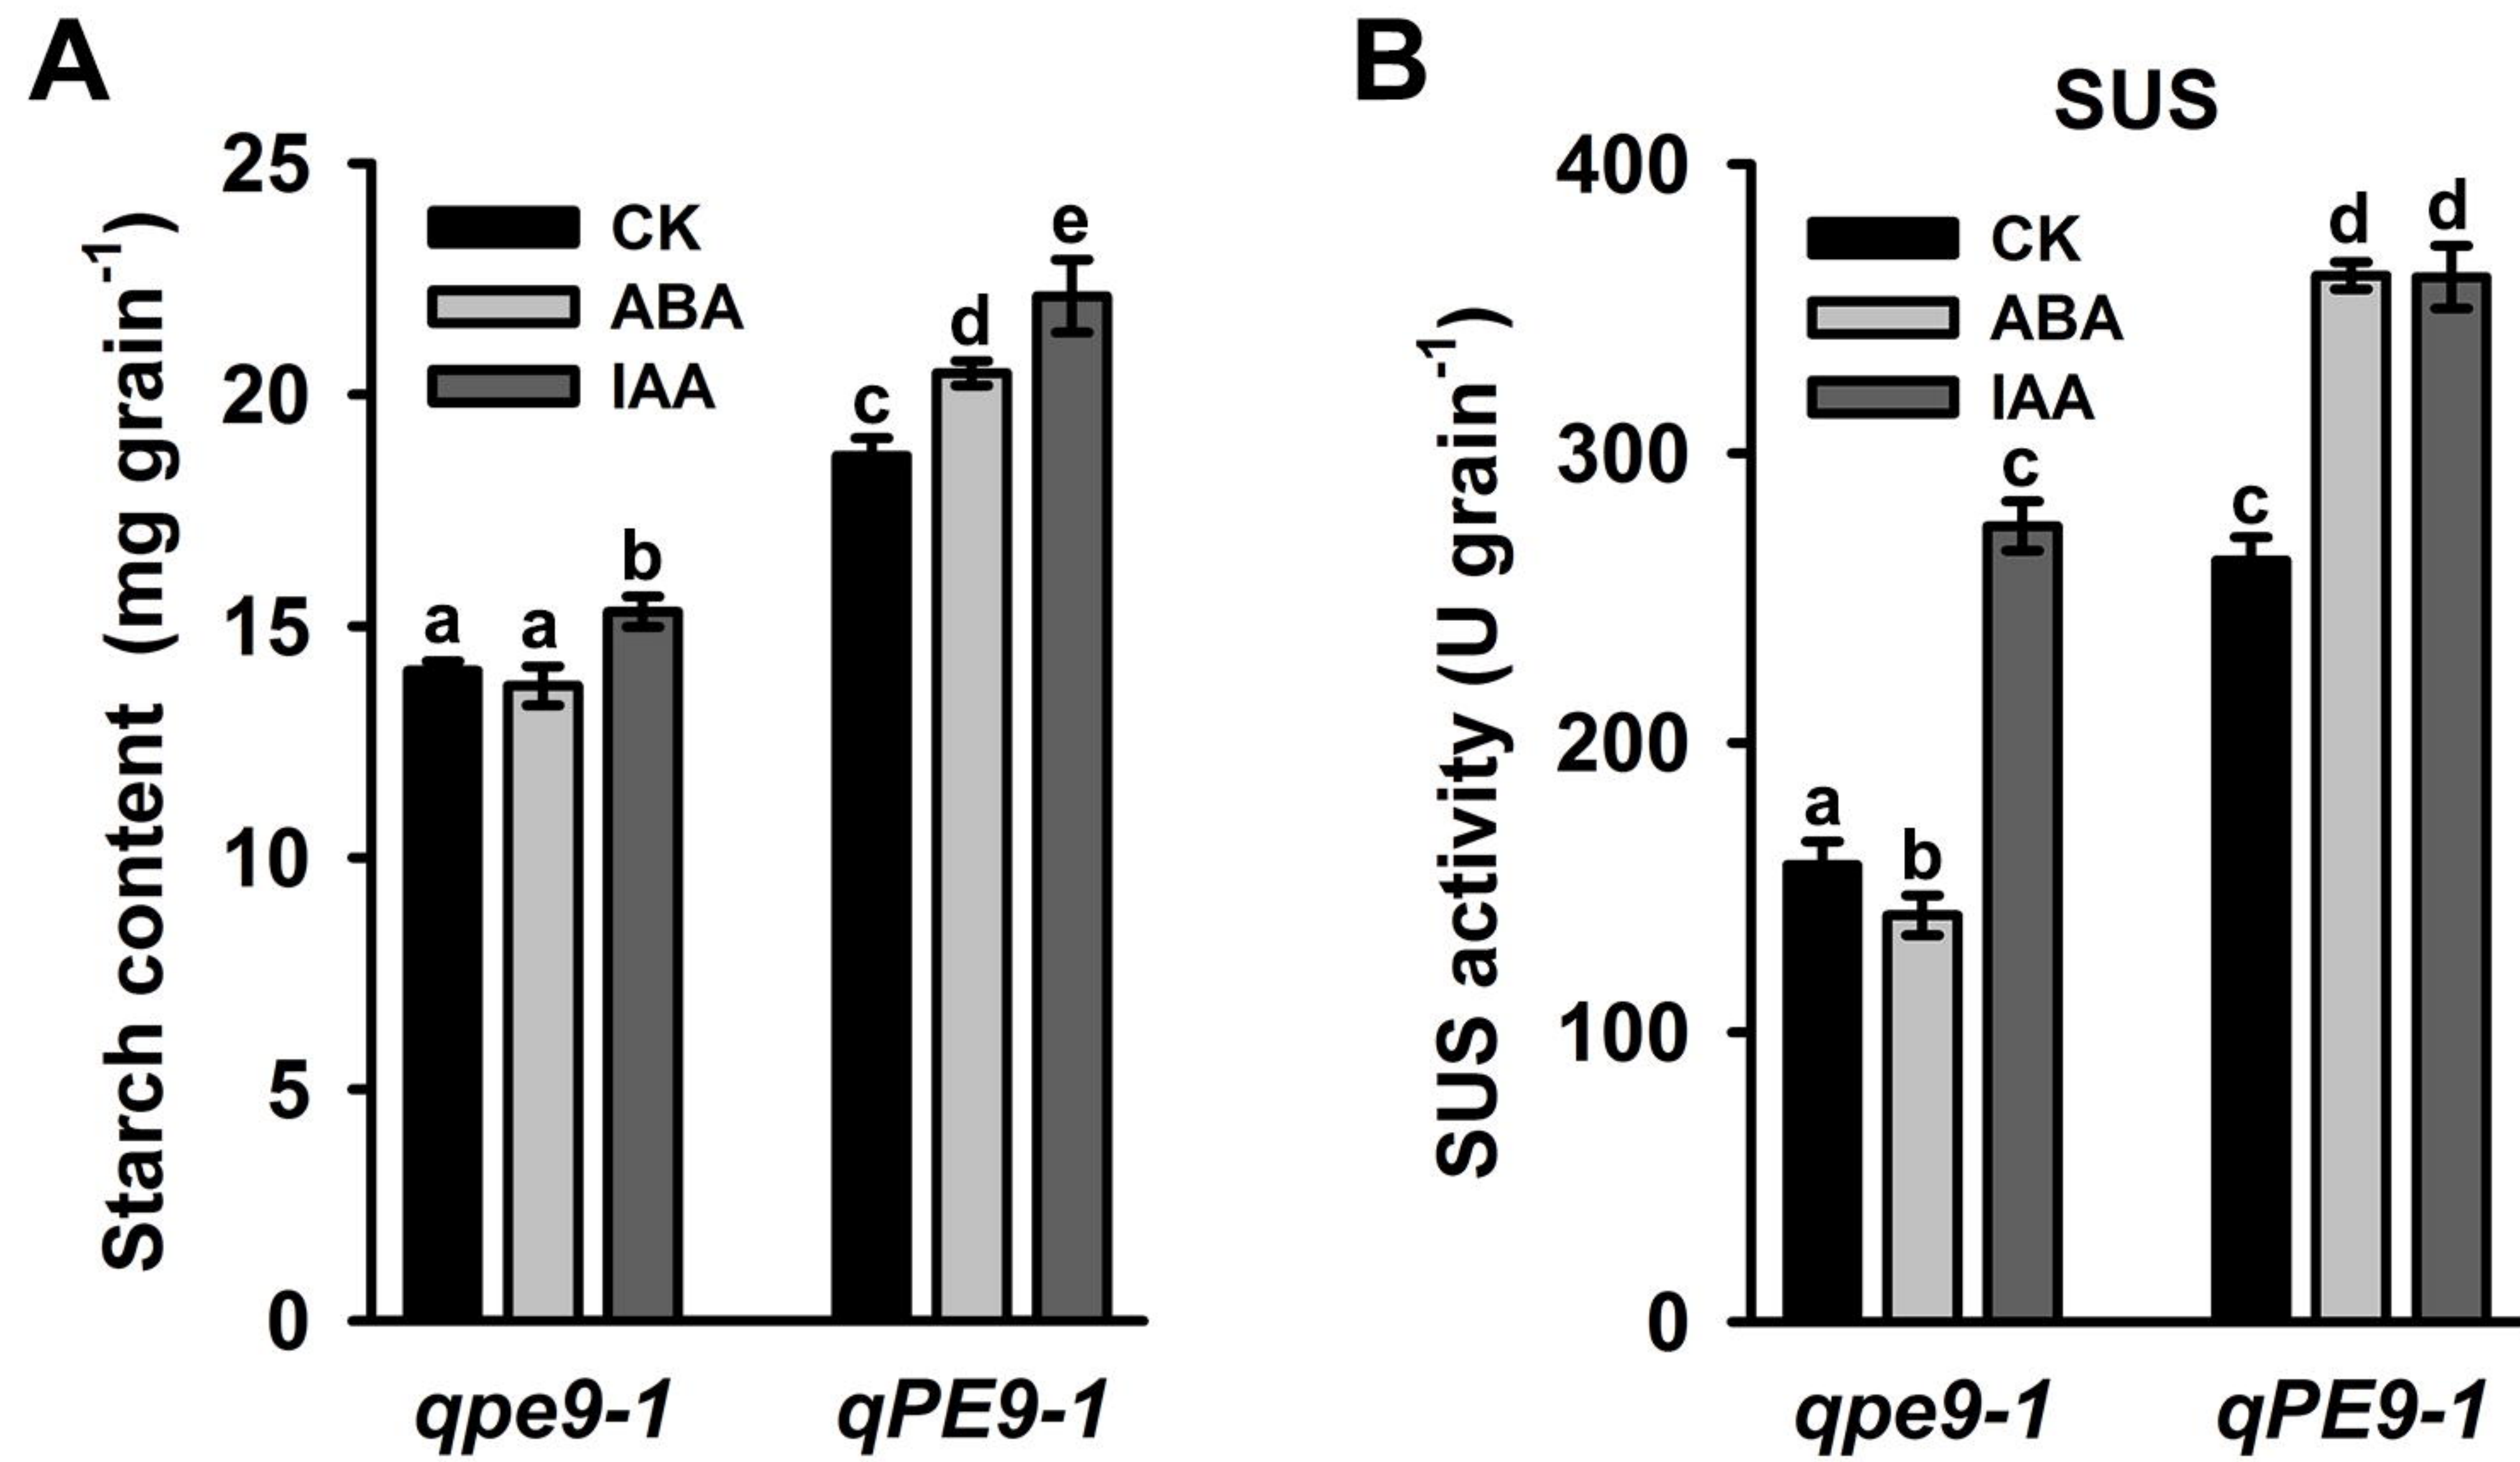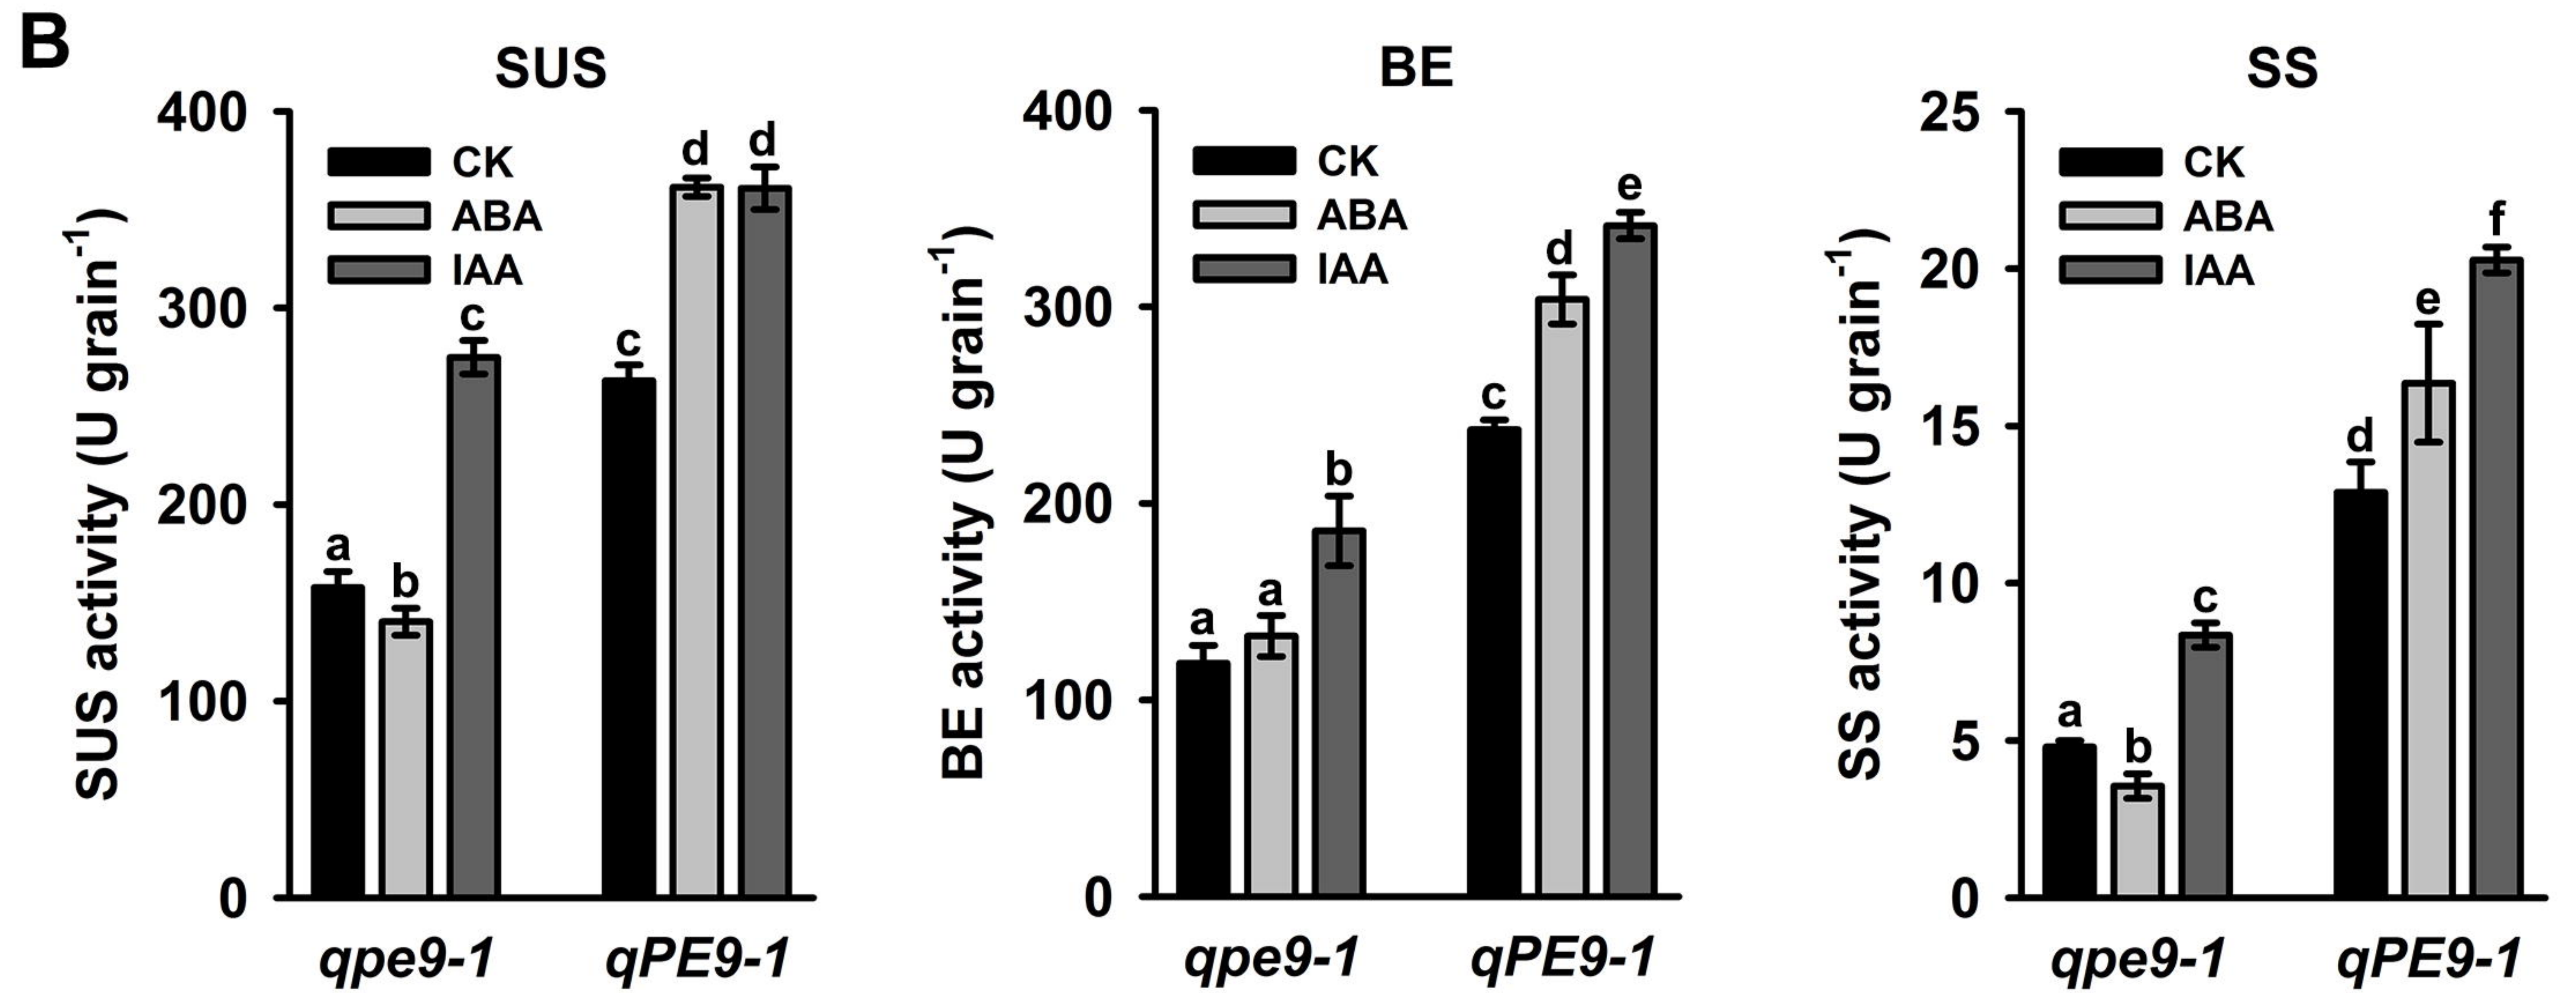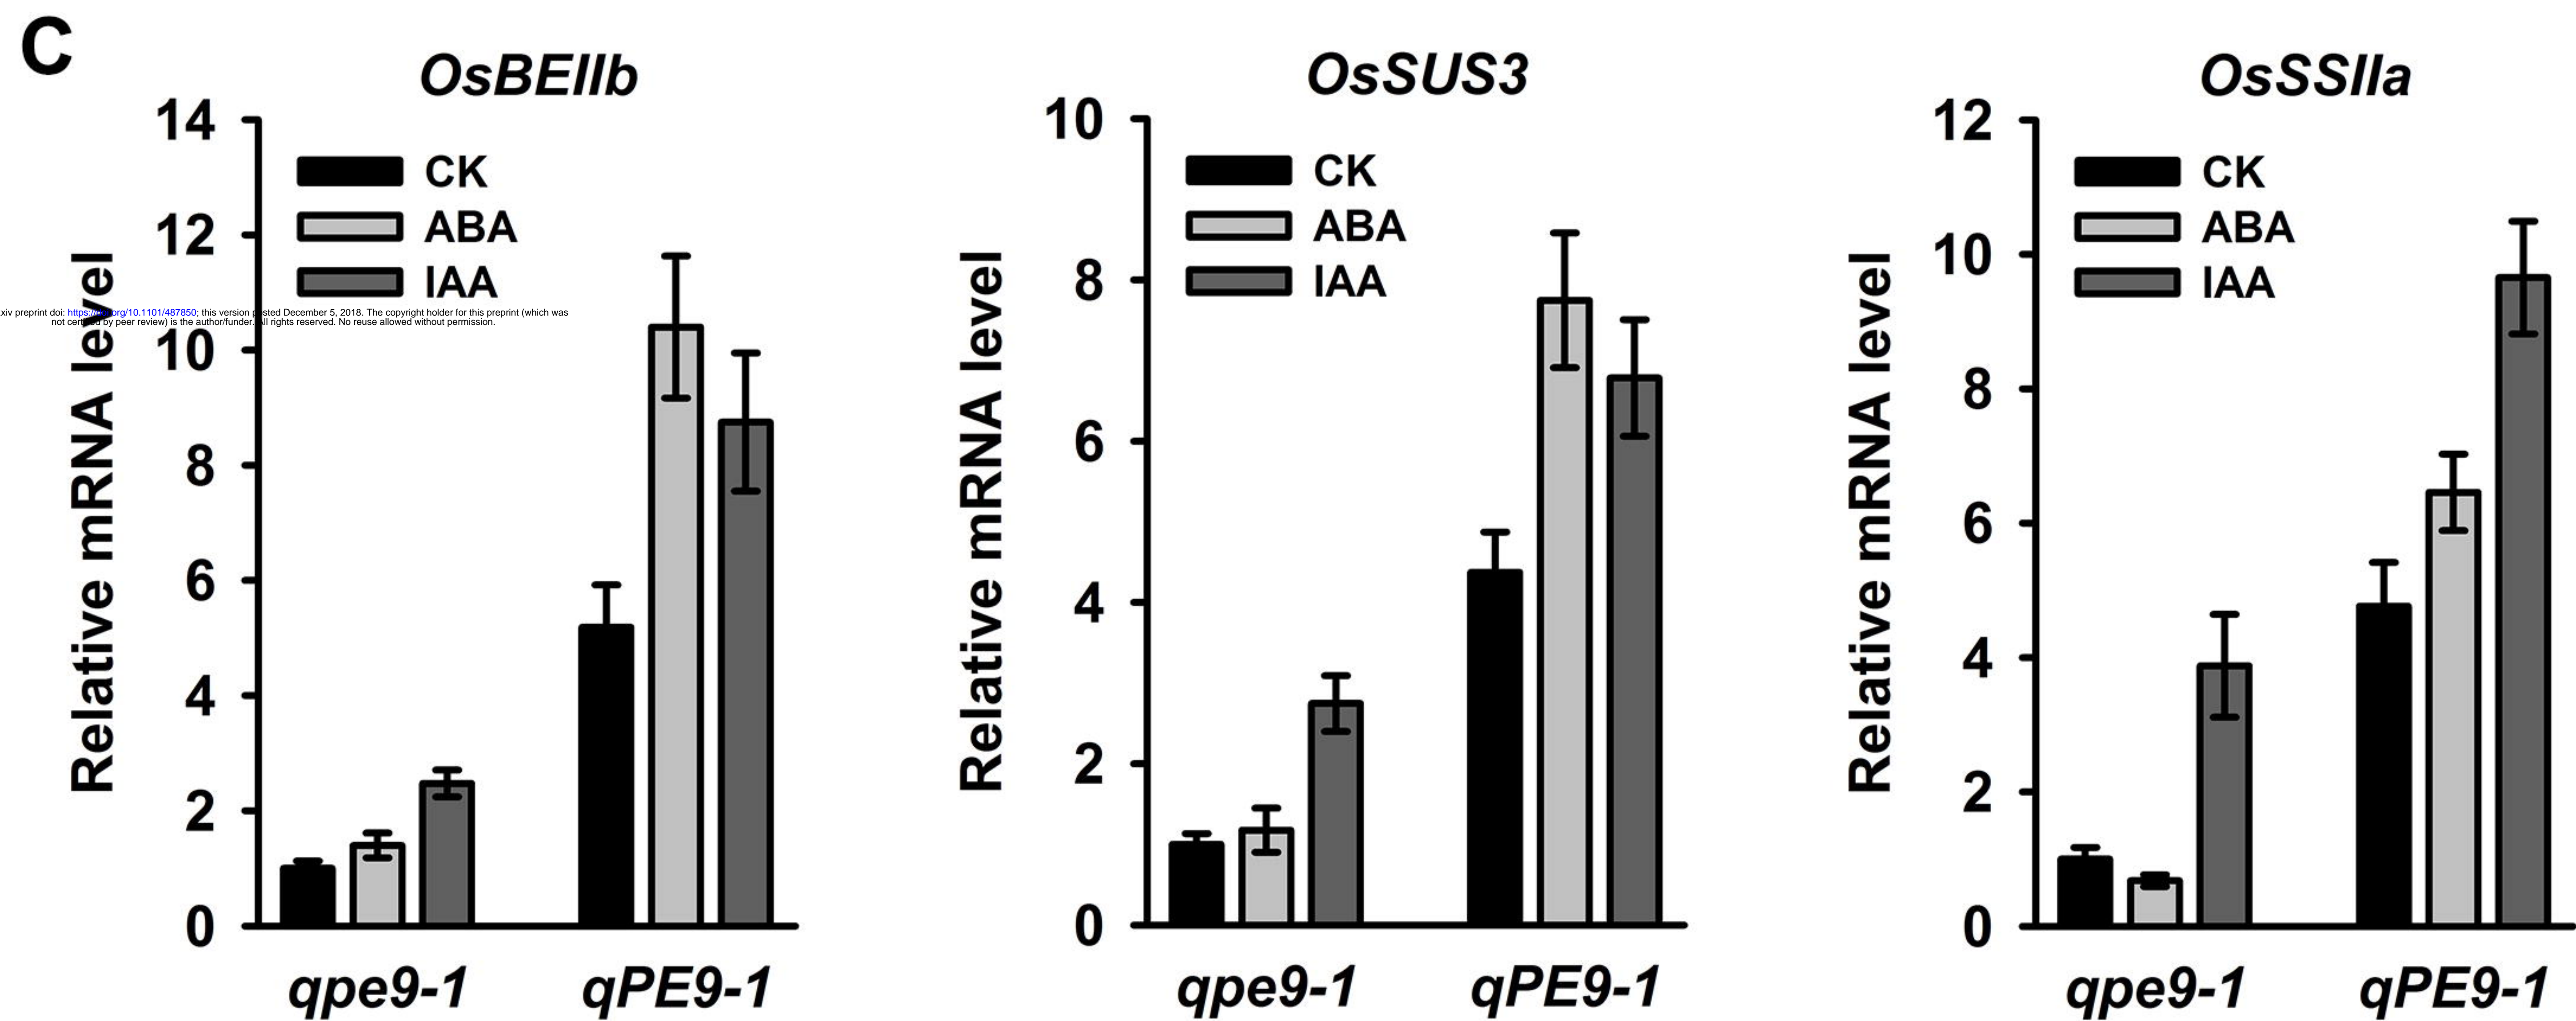

Source: https://www.biorxiv.org/content/10.1101/487850v1.full.pdf
